# Supplementary material for: Taxonomic Composition and Trophic Structure of the Continental Bony Fish Assemblage from the Early Late Cretaceous of Southeastern Morocco
Source: PLoS One. 2015 May 27;10(5):e0125786. doi: 10.1371/journal.pone.0125786 (PMC4446216; doi:10.1371/journal.pone.0125786)
Supplement: S1 Table — (XLSX) [file pone.0125786.s002.xlsx]

## Sheet: Table 1
Taxonomic composition and trophic structure of the continental bony fish assemblage
from the early Late Cretaceous of southeastern Morocco
Lionel Cavin, Larbi Boudad, Haiyan Tong, Emilie Läng, Jérôme Tabouelle, Romain Vullo
Data from FishBase (version (06/2014). www.fishbase.org
Supporting information 2	Data for Recent fish assemblages
Paraguay basin
Species	Name	Family	Habitat	Length (cm) TL	Trophic Level
Acestrorhynchus pantaneiro		Acestrorhynchidae	benthopelagic	35.2	4.2
Catathyridium lorentzii		Achiridae	demersal	14	3.3
Abramites hypselonotus	Marbled headstander	Anostomidae	pelagic	14	2.9
Leporinus macrocephalus		Anostomidae	benthopelagic	73.2	2
Leporinus obtusidens		Anostomidae	benthopelagic	76	2
Leporinus striatus		Anostomidae	benthopelagic	25	2
Schizodon borellii		Anostomidae	benthopelagic	36.6	2.5
Schizodon isognathus		Anostomidae	benthopelagic	42.7	2.5
Schizodon nasutus		Anostomidae	benthopelagic	40.2	2.8
Apteronotus caudimaculosus		Apteronotidae	benthopelagic	28.7	3.3
Apteronotus ellisi		Apteronotidae	benthopelagic	32.8	3.3
Bunocephalus doriae		Aspredinidae	demersal	10.1	3.1
Pseudobunocephalus iheringii		Aspredinidae	demersal	7.2	3.1
Pseudobunocephalus rugosus		Aspredinidae	demersal	3.7	3
Pterobunocephalus depressus		Aspredinidae	demersal	10.9	3.1
Xyliphius barbatus		Aspredinidae	demersal	11.2	3.1
Entomocorus radiosus		Auchenipteridae	pelagic	6.4	3.3
Epapterus dispilurus		Auchenipteridae	demersal	15.9	4.2
Tatia neivai		Auchenipteridae	benthopelagic	10	3.3
Potamorrhaphis eigenmanni		Belonidae	pelagic	27.8	3.9
Pseudotylosurus angusticeps		Belonidae	pelagic	36.4	4
Brycon hilarii		Bryconidae	benthopelagic	56	2
Salminus brasiliensis	Dorado	Bryconidae	benthopelagic	122	3.8
Corydoras areio		Callichthyidae	demersal	6.1	3
Corydoras aurofrenatus		Callichthyidae	demersal	5.8	3
Corydoras britskii	Britski's catfish	Callichthyidae	demersal	10.7	2.9
Corydoras ellisae		Callichthyidae	demersal	6.1	3
Corydoras isbrueckeri		Callichthyidae	demersal	7.5	2.9
Corydoras paragua		Callichthyidae	demersal	4.3	3
Corydoras paucerna		Callichthyidae	demersal	4.4	3
Corydoras polystictus		Callichthyidae	demersal	4.3	2.9
Lepthoplosternum pectorale		Callichthyidae	demersal	7.4	2.9
Megalechis thoracata		Callichthyidae	demersal	15.1	2.9
Cetopsis gobioides		Cetopsidae	demersal	13.3	3.6
Aphyocharax dentatus		Characidae	benthopelagic	8.8	3
Aphyocharax gracilis		Characidae	benthopelagic	6.6	3
Aphyocharax nattereri		Characidae	benthopelagic	3.8	3
Aphyocharax paraguayensis		Characidae	benthopelagic	3.8	3
Aphyocharax rathbuni	Redflank bloodfin	Characidae	benthopelagic	3.3	3
Astyanacinus moorii		Characidae	benthopelagic	12.2	3
Astyanax asuncionensis		Characidae	benthopelagic	18.3	2.8
Astyanax lineatus		Characidae	benthopelagic	14.6	2.8
Astyanax marionae		Characidae	benthopelagic	7.3	2.8
Astyanax paraguayensis		Characidae	benthopelagic	10.4	2.8
Astyanax pellegrini		Characidae	benthopelagic	9.8	2.8
Astyanax pirapuan		Characidae	benthopelagic	10.4
Brachychalcinus retrospina		Characidae	benthopelagic	8.4	3.2
Bryconamericus exodon		Characidae	benthopelagic	6.9	2.7
Bryconamericus stramineus		Characidae	benthopelagic	11.4	2.7
Bryconamericus thomasi		Characidae	benthopelagic	8.5	2.6
Charax leticiae		Characidae	benthopelagic	12.2	3.7
Charax stenopterus		Characidae	benthopelagic	11.5	3.7
Creagrutus meridionalis		Characidae	benthopelagic	7.6	2.4
Creagrutus paraguayensis		Characidae	benthopelagic	7.1	2.4
Ctenobrycon alleni		Characidae	pelagic	11	2.8
Cynopotamus argenteus		Characidae	benthopelagic	29.3	4
Cynopotamus kincaidi		Characidae	benthopelagic	25.8	4
Galeocharax humeralis		Characidae	benthopelagic	30.5	4
Gymnocorymbus ternetzi	Black tetra	Characidae	pelagic	9.1	3.1
Hemigrammus lunatus		Characidae	benthopelagic	4.8	3
Hemigrammus mahnerti		Characidae	benthopelagic	3.4	3
Hemigrammus marginatus		Characidae	benthopelagic	5.5	2.8
Hemigrammus maxillaris		Characidae	benthopelagic	6.1	3
Hemigrammus tridens		Characidae	benthopelagic	2.4	3
Hemigrammus ulreyi		Characidae	benthopelagic	4.4	3
Hyphessobrycon anisitsi	Buenos Aires tetra	Characidae	benthopelagic	7.3	3
Hyphessobrycon elachys		Characidae	benthopelagic	2.4	3
Hyphessobrycon eques	Jewel tetra	Characidae	benthopelagic	4.9	3.1
Hyphessobrycon herbertaxelrodi	Black neon tetra	Characidae	benthopelagic	3.9	2.9
Hyphessobrycon luetkenii		Characidae	benthopelagic	8.5	2.9
Hyphessobrycon megalopterus	Black phantom tetra	Characidae	benthopelagic	4.4	3.2
Jupiaba acanthogaster		Characidae	benthopelagic	6.7	2.9
Knodus chapadae		Characidae	benthopelagic	6.9	2.8
Knodus geryi		Characidae	benthopelagic	7.9	3.2
Knodus moenkhausii		Characidae	benthopelagic	4.5	2.6
Markiana nigripinnis		Characidae	benthopelagic	12.7	3
Mimagoniates pulcher		Characidae	benthopelagic	4.5
Mixobrycon ribeiroi		Characidae	pelagic	4.3	3
Moenkhausia cosmops		Characidae	benthopelagic	5.9	3.3
Moenkhausia dichroura	Bandtail tetra	Characidae	benthopelagic	12.2	3.5
Moenkhausia forestii		Characidae	benthopelagic	4.6
Moenkhausia lopesi		Characidae	benthopelagic	4.7	3.3
Moenkhausia sanctaefilomenae	Redeye tetra	Characidae	benthopelagic	8.5	3
Odontostilbe microcephala		Characidae	benthopelagic	5.6	2.4
Odontostilbe paraguayensis		Characidae	benthopelagic	4.9	2.5
Odontostilbe pequira		Characidae	benthopelagic	6.8	2.4
Oligosarcus bolivianus		Characidae	benthopelagic	17.9	3.8
Oligosarcus oligolepis		Characidae	pelagic	3	3.2
Oligosarcus perdido		Characidae	demersal	11.9	3.6
Phenacogaster jancupa		Characidae	benthopelagic	5.7	3.4
Phenacogaster tegatus		Characidae	benthopelagic	4.3	3.3
Piabarchus analis		Characidae	benthopelagic	4.5	3
Piabarchus torrenticola		Characidae	benthopelagic	9.4	3
Planaltina myersi		Characidae	benthopelagic	5.6	3.2
Poptella paraguayensis		Characidae	benthopelagic	8.5	3.2
Prionobrama paraguayensis		Characidae	pelagic	5	3
Psellogrammus kennedyi		Characidae	benthopelagic	7.2	3
Pseudocorynopoma doriae	Dragonfin tetra	Characidae	benthopelagic	7.6	3.3
Roeboides descalvadensis	Parana scale-eating characin	Characidae	benthopelagic	10.9	3.3
Roeboides microlepis		Characidae	benthopelagic	24.4	4
Roeboides prognathus		Characidae	benthopelagic	17.1	4.1
Serrapinnus calliurus		Characidae	benthopelagic	5.4	2.6
Serrapinnus heterodon		Characidae	pelagic	5	2.5
Serrapinnus kriegi		Characidae	benthopelagic	2.9	2.8
Serrapinnus microdon		Characidae	benthopelagic	5.1	2.6
Serrapinnus notomelas		Characidae	benthopelagic	4.3	2.2
Xenurobrycon macropus		Characidae	benthopelagic	2.4	3
Aequidens plagiozonatus		Cichlidae	benthopelagic	12.6	3.2
Apistogramma borellii	Umbrella cichlid	Cichlidae	benthopelagic	4.8	3.3
Apistogramma commbrae	Corumba cichlid	Cichlidae	benthopelagic	3.5	3.2
Apistogramma inconspicua		Cichlidae	benthopelagic	5.4	3.3
Apistogramma trifasciata		Cichlidae	benthopelagic	5.4	3.3
Astronotus crassipinnis		Cichlidae	benthopelagic	29.3	3
Bujurquina oenolaemus		Cichlidae	benthopelagic	8.2	3.4
Bujurquina vittata	Banded acara	Cichlidae	benthopelagic	11	3.4
Chaetobranchopsis australis		Cichlidae	benthopelagic	14.6	3.5
Cichlasoma dimerus		Cichlidae	benthopelagic	14.3	3.4
Crenicichla lepidota	Pike cichlid	Cichlidae	benthopelagic	22	3.6
Crenicichla semifasciata		Cichlidae	benthopelagic	18.3	3.2
Crenicichla vittata		Cichlidae	benthopelagic	31.7	3.2
Gymnogeophagus balzanii	Argentine humphead	Cichlidae	benthopelagic	14.6	3.3
Laetacara dorsigera	Redbreast acara	Cichlidae	benthopelagic	7.3	3.1
Mesonauta festivus	Flag cichlid	Cichlidae	benthopelagic	10	2.5
Satanoperca pappaterra	Pantanal eartheater	Cichlidae	benthopelagic	23.4	2.8
Characidium nupelia		Crenuchidae	benthopelagic	3.9	3
Characidium rachovii		Crenuchidae	benthopelagic	5.3	3.1
Curimatella dorsalis		Curimatidae	benthopelagic	13.9	2.2
Curimatopsis myersi		Curimatidae	benthopelagic	5.3	2.6
Cyphocharax gillii		Curimatidae	benthopelagic	12.2	2
Cyphocharax modestus		Curimatidae	benthopelagic	19.8	2
Cyphocharax platanus		Curimatidae	benthopelagic	16.4	2
Cyphocharax spilotus		Curimatidae	benthopelagic	10.9	2.1
Cyphocharax voga		Curimatidae	benthopelagic	23.9	2
Potamorhina squamoralevis		Curimatidae	benthopelagic	28.5	2
Psectrogaster curviventris		Curimatidae	benthopelagic	20.9	2
Steindachnerina biornata		Curimatidae	benthopelagic	18.8	2
Steindachnerina brevipinna		Curimatidae	benthopelagic	20.5	2
Steindachnerina conspersa		Curimatidae	benthopelagic	15.6	2
Rhaphiodon vulpinus	Biara	Cynodontidae	pelagic	97.6	4.5
Ossancora eigenmanni		Doradidae	demersal	12.5	2.8
Gasteropelecus sternicla	River hatchetfish	Gasteropelecidae	pelagic	4.6	3.3
Thoracocharax stellatus	Spotfin hatchetfish	Gasteropelecidae	pelagic	8.2	3.5
Gymnotus inaequilabiatus		Gymnotidae	benthopelagic	60	3.3
Gymnotus paraguensis		Gymnotidae	benthopelagic	29.3	3.2
Hemiodus orthonops		Hemiodontidae	benthopelagic	30.5	2.7
Imparfinis stictonotus		Heptapteridae	demersal	5.9	3
Phenacorhamdia hoehnei		Heptapteridae	demersal	4.6	3.1
Pimelodella griffini		Heptapteridae	demersal	8.8	3.4
Pimelodella laticeps		Heptapteridae	demersal	9	3.4
Pimelodella megalura		Heptapteridae	demersal	22	3.7
Pimelodella mucosa		Heptapteridae	demersal	16.5	3.6
Pimelodella notomelas		Heptapteridae	demersal	6	3.3
Pimelodella parva		Heptapteridae	demersal	2.8	3.1
Pimelodella taeniophora		Heptapteridae	demersal	8.5	3.4
Pimelodella taenioptera		Heptapteridae	demersal	14.8	3.6
Piabucus melanostoma		Iguanodectidae	benthopelagic	14	3
Pyrrhulina australis		Lebiasinidae	benthopelagic	6.1	3.2
Lepidosiren paradoxa	South American lungfish	Lepidosirenidae	demersal	125	3.1
Ancistrus claro		Loricariidae	demersal	8.1	2.3
Ancistrus cuiabae		Loricariidae	demersal	14	2
Ancistrus dubius		Loricariidae	demersal	15.4	2
Ancistrus hoplogenys		Loricariidae	demersal	19.3	2
Ancistrus pirareta		Loricariidae	demersal	19	2
Brochiloricaria macrodon		Loricariidae	demersal	32.7	2.3
Farlowella isbruckeri		Loricariidae	demersal	16.4	2.4
Farlowella jauruensis		Loricariidae	demersal	16	2.5
Farlowella paraguayensis		Loricariidae	demersal	21.4	2.4
Hemiodontichthys acipenserinus		Loricariidae	demersal	16.4	3.3
Hisonotus maculipinnis		Loricariidae	benthopelagic	4.9	2
Hisonotus nigricauda		Loricariidae	benthopelagic	6.1	2
Hypoptopoma inexspectatum		Loricariidae	demersal	8.7	2
Hypostomus careopinnatus		Loricariidae	demersal	7.1
Hypostomus peckoltoides		Loricariidae	demersal	13.5
Loricaria apeltogaster		Loricariidae	demersal	31.7	2.3
Loricaria holmbergi		Loricariidae	demersal	24	2.3
Loricaria luciae		Loricariidae	demersal
Loricariichthys labialis		Loricariidae	demersal	26.8	2.6
Megalancistrus parananus		Loricariidae	demersal	71.7	2
Otocinclus bororo		Loricariidae	demersal	3.8	2.3
Otocinclus vittatus		Loricariidae	demersal	3.3	2.5
Otothyropsis piribebuy		Loricariidae	demersal	3.5
Paraloricaria agastor		Loricariidae	demersal	13.2	2.5
Pseudohemiodon laticeps		Loricariidae	demersal	36.4	2.2
Pseudohemiodon platycephalus		Loricariidae	demersal	22	2.4
Pterygoplichthys ambrosettii		Loricariidae	demersal	43.2
Pyxiloricaria menezesi		Loricariidae	demersal	17.1	2.4
Rineloricaria cacerensis		Loricariidae	demersal	16.4	2.4
Rineloricaria hoehnei		Loricariidae	demersal	7.1	2.7
Rineloricaria parva		Loricariidae	demersal	13.4	2.5
Spatuloricaria evansii		Loricariidae	demersal	24.4	2.3
Sturisoma barbatum		Loricariidae	demersal	34.2	2.3
Sturisoma robustum		Loricariidae	demersal	30.5	2.3
Parodon carrikeri		Parodontidae	benthopelagic	17.9	2.3
Iheringichthys megalops		Pimelodidae	demersal	25.9	3.9
Pimelodus ornatus		Pimelodidae	benthopelagic	47	3.3
Pimelodus pantaneiro		Pimelodidae	demersal	31.3	3.3
Pseudoplatystoma reticulatum		Pimelodidae	demersal	73.8
Zungaro jahu		Pimelodidae	benthopelagic	170.8	4.5
Cnesterodon raddai		Poeciliidae	benthopelagic	2.8	3
Pamphorichthys hasemani		Poeciliidae	pelagic	2.5	3
Phalloceros harpagos		Poeciliidae	benthopelagic	5.7	3
Phallotorynus psittakos		Poeciliidae	benthopelagic	2.9	3
Potamotrygon brachyura	Short-tailed river stingray	Potamotrygonidae	demersal	144.8	3.2
Potamotrygon falkneri	Largespot river stingray	Potamotrygonidae	benthopelagic	144.8	3.2
Potamotrygon hystrix	Porcupine river stingray	Potamotrygonidae	benthopelagic	144.8	3.2
Potamotrygon motoro	South American freshwater stingray	Potamotrygonidae	benthopelagic	144.8	3.2
Potamotrygon schuhmacheri		Potamotrygonidae	benthopelagic	144.8	3.2
Prochilodus lineatus	Streaked prochilod	Prochilodontidae	benthopelagic	80	2.2
Batrochoglanis melanurus		Pseudopimelodidae	demersal	16.7	3.6
Microglanis carlae		Pseudopimelodidae	demersal	4.1	3.2
Pseudopimelodus mangurus		Pseudopimelodidae	demersal	69	3.9
Austrolebias monstrosus		Rivulidae	benthopelagic	15	3.3
Austrolebias paranaensis		Rivulidae	benthopelagic	7	3.2
Austrolebias patriciae		Rivulidae	benthopelagic	4	3.1
Austrolebias vandenbergi		Rivulidae	benthopelagic	9	3.2
Melanorivulus bororo		Rivulidae	benthopelagic	3	3.1
Melanorivulus paresi		Rivulidae	benthopelagic	3.9	3.2
Melanorivulus punctatus		Rivulidae	benthopelagic	3.5	3.1
Moema heterostigma		Rivulidae	benthopelagic	9	3.3
Neofundulus ornatipinnis		Rivulidae	benthopelagic	7	3.2
Neofundulus paraguayensis		Rivulidae	benthopelagic	7	3.2
Neofundulus parvipinnis		Rivulidae	benthopelagic	6	3.2
Papiliolebias bitteri		Rivulidae	benthopelagic	5	3.2
Plesiolebias glaucopterus		Rivulidae	benthopelagic	3	3.1
Pterolebias longipinnis	Longfin killie	Rivulidae	benthopelagic	12	3.3
Pterolebias phasianus		Rivulidae	benthopelagic	7	3.2
Simpsonichthys chacoensis		Rivulidae	benthopelagic	6	3.2
Stenolebias bellus		Rivulidae	benthopelagic	3	3.1
Stenolebias damascenoi		Rivulidae	benthopelagic	4	3.1
Trigonectes aplocheiloides		Rivulidae	benthopelagic	10	3.3
Trigonectes balzanii		Rivulidae	benthopelagic	16	3.3
Pachyurus bonariensis	La Plata croaker	Sciaenidae	benthopelagic	27.6	3.5
Plagioscion squamosissimus	South American silver croaker	Sciaenidae	benthopelagic	80	4.3
Plagioscion ternetzi	Freshwater croaker	Sciaenidae	benthopelagic	47.6	3.9
Scoloplax dicra		Scoloplacidae	demersal	1.7	3
Scoloplax distolothrix		Scoloplacidae	demersal	2.2	3
Scoloplax empousa	Pantanal dwarf catfish	Scoloplacidae	demersal	2.4	2.8
Catoprion mento	Wimple piranha	Serrasalmidae	pelagic	18.3	3.2
Metynnis cuiaba		Serrasalmidae	benthopelagic	17.4
Metynnis hypsauchen	Silver dollar	Serrasalmidae	pelagic	15	2.9
Metynnis maculatus	Spotted metynnis	Serrasalmidae	pelagic	18	2.9
Metynnis mola		Serrasalmidae	pelagic	15	2.9
Metynnis otuquensis		Serrasalmidae	pelagic	10.6	2.9
Myleus levis		Serrasalmidae	benthopelagic	24.4	2
Myleus tiete		Serrasalmidae	benthopelagic	19.9	2.2
Mylossoma duriventre		Serrasalmidae	benthopelagic	30.5	2.8
Piaractus mesopotamicus	Pacu	Serrasalmidae	demersal	49.4	2
Serrasalmus maculatus		Serrasalmidae	pelagic	26	4.1
Serrasalmus marginatus		Serrasalmidae	benthopelagic	32.9	3.5
Eigenmannia trilineata		Sternopygidae	benthopelagic	25	3
Sternopygus macrurus	Longtail knifefish	Sternopygidae	benthopelagic	140.5	3.2
Homodiaetus anisitsi		Trichomycteridae	demersal	5.1	3.1
Ituglanis eichorniarum		Trichomycteridae	benthopelagic	6.3	3.2
Ituglanis herberti		Trichomycteridae	benthopelagic	8.1	3.2
Ochmacanthus batrachostomus		Trichomycteridae	benthopelagic	3.9	3.1
Paravandellia oxyptera	Pantanal parasitic catfish	Trichomycteridae	benthopelagic	3.4	3.1
Tridentopsis cahuali		Trichomycteridae	benthopelagic	2.7	3
Clupeacharax anchoveoides		Triportheidae	pelagic	8	3
Engraulisoma taeniatum		Triportheidae	pelagic	5.1	3
Triportheus nematurus		Triportheidae	benthopelagic	22.3	2.8
Triportheus pantanensis		Triportheidae	benthopelagic	19.3	2.8
Triportheus paranensis	Tetra	Triportheidae	benthopelagic	23.2	2.8
			Means	19.7077	2.97381

## Sheet: Table 2
Data from FishBase (version (06/2014). www.fishbase.org
Gange
Species	Name	Family	Habitat	Length (cm)	Trophic Level
Parambassis lala	Highfin glassy perchlet	Ambassidae	demersal	4.7	3.2
Arius maculatus	Spotted catfish	Ariidae	demersal	80	3.4
Badis badis	Badis	Badidae	benthopelagic	5	3.3
Badis chittagongis		Badidae	benthopelagic	4.3	3.1
Batasio macronotus		Bagridae	benthopelagic	10.9	3.3
Hemibagrus menoda	Menoda catfish	Bagridae	demersal	45	3.5
Mystus dibrugarensis		Bagridae	demersal	19.9
Mystus gulio	Long whiskers catfish	Bagridae	demersal	46	4
Sperata aor	Long-whiskered catfish	Bagridae	demersal	180	3.6
Sperata seenghala	Giant river-catfish	Bagridae	demersal	150	3.7
Xenentodon cancila	Freshwater garfish	Belonidae	pelagic-neritic	40	3.9
Chaca chaca	Squarehead catfish	Chacidae	demersal	20	4.2
Gonialosa manmina	Ganges river gizzard shad	Clupeidae	pelagic	14.1	3.2
Gudusia chapra	Indian river shad	Clupeidae	pelagic	20	3.3
Tenualosa ilisha	Hilsa shad	Clupeidae	pelagic-neritic	73.2	2
Botia dario	Bengal loach	Cobitidae	demersal	15.1	3.3
Botia lohachata	Reticulate loach	Cobitidae	demersal	13.4	3.3
Lepidocephalichthys annandalei	Annandale loach	Cobitidae	demersal	5.3	2.8
Lepidocephalichthys goalparensis		Cobitidae	demersal	5.4
Lepidocephalichthys guntea	Guntea loach	Cobitidae	demersal	15	2.6
Pangio pangia		Cobitidae	demersal	6.5	3.4
Bangana ariza	Reba	Cyprinidae	benthopelagic	36.6	2.7
Barilius barna		Cyprinidae	benthopelagic	15	3.4
Barilius shacra		Cyprinidae	benthopelagic	14	3.3
Barilius tileo		Cyprinidae	benthopelagic	37.2	3.5
Barilius vagra		Cyprinidae	benthopelagic	12.5	3.3
Chagunius chagunio	Chaguni	Cyprinidae	demersal	50	2.8
Crossocheilus latius	Stone roller	Cyprinidae	benthopelagic	12.5	2.1
Danio rerio	Zebra danio	Cyprinidae	benthopelagic	4.6	3.1
Labeo boga		Cyprinidae	benthopelagic	30	2.3
Labeo pangusia		Cyprinidae	benthopelagic	90	2
Neolissochilus spinulosus		Cyprinidae	benthopelagic	36.5	2.1
Opsarius cocsa		Cyprinidae	benthopelagic	12.8	3.2
Pethia conchonius	Rosy barb	Cyprinidae	benthopelagic	14	2.9
Pethia guganio	Glass-barb	Cyprinidae	benthopelagic	8	2.9
Puntius chelynoides	Dark mahseer	Cyprinidae	benthopelagic	66	2.6
Raiamas bola	Trout barb	Cyprinidae	demersal	35	2.8
Rasbora rasbora	Gangetic scissortail rasbora	Cyprinidae	benthopelagic	13	3.2
Salmophasia bacaila	Large razorbelly minnow	Cyprinidae	benthopelagic	18	3.2
Salmophasia phulo	Finescale razorbelly minnow	Cyprinidae	benthopelagic	12	3.2
Salmophasia sardinella	Sardinella razorbelly minnow	Cyprinidae	benthopelagic	15	3.2
Schizothorax progastus	Dinnawah snowtrout	Cyprinidae	benthopelagic	50	2.8
Systomus clavatus	Stedman barb	Cyprinidae	benthopelagic	24	3.2
Tor tor	Tor barb	Cyprinidae	benthopelagic	200	2.3
Datnioides polota		Datnioididae	benthopelagic	36.6	3.7
Setipinna brevifilis	Short-hairfin anchovy	Engraulidae	pelagic	31.7	3.4
Setipinna phasa	Gangetic hairfin anchovy	Engraulidae	pelagic	40	3.3
Erethistes pusillus		Erethistidae	demersal	5.2	3.1
Pseudolaguvia flavida		Erethistidae	demersal	3
Rhinomugil corsula	Corsula	Mugilidae	pelagic	45	2.4
Sicamugil cascasia	Yellowtail mullet	Mugilidae	demersal	10	2.7
Nandus andrewi		Nandidae	benthopelagic	15.3	3.5
Acanthocobitis botia	Moted loach	Nemacheilidae	demersal	11	3.2
Schistura obliquofascia		Nemacheilidae	demersal	12
Triplophysa stewarti		Nemacheilidae	benthopelagic	25.4	3.1
Chitala chitala	Clown knifefish	Notopteridae	demersal	148.8	3.7
Notopterus notopterus	Bronze featherback	Notopteridae	demersal	73.2	3.5
Trichogaster chuna	Honey gourami	Osphronemidae	benthopelagic	7	3
Trichogaster lalius	Dwarf gourami	Osphronemidae	benthopelagic	8.8	3
Pangasius pangasius	Pangas catfish	Pangasiidae	benthopelagic	366	3.4
Ilisha megaloptera	Bigeye ilisha	Pristigasteridae	pelagic-neritic	34.2	3
Psilorhynchus nepalensis		Psilorhynchidae	benthopelagic	5.8	2.9
Psilorhynchus sucatio	River stone carp	Psilorhynchidae	demersal	8.2	2.9
Ailia coila	Gangetic ailia	Schilbeidae	pelagic	30	3.4
Ailiichthys punctata	Jamuna ailia	Schilbeidae	demersal	10	3.2
Eutropiichthys murius		Schilbeidae	demersal	28	3.4
Silonia silondia	Silond catfish	Schilbeidae	demersal	183	3.5
Johnius gangeticus		Sciaenidae	benthopelagic	14.6	3.2
Otolithoides pama	Pama croaker	Sciaenidae	benthopelagic	160	3.8
Ompok pabda	Pabdah catfish	Siluridae	demersal	30	3.8
Pinniwallago kanpurensis		Siluridae	demersal	50.2	4
Pterocryptis gangelica		Siluridae	demersal	18	3.6
Wallago attu	Wallago	Siluridae	demersal	240	3.7
Bagarius bagarius	Goonch	Sisoridae	benthopelagic	200	3.7
Bagarius yarrelli		Sisoridae	demersal	244	3.7
Euchiloglanis kishinouyei		Sisoridae	demersal	21.6	3.2
Gagata cenia		Sisoridae	demersal	18.3	3.3
Gagata gagata	Gangetic gagata	Sisoridae	demersal	31	3.4
Gagata sexualis		Sisoridae	demersal	6	3.2
Gagata youssoufi		Sisoridae	benthopelagic	6.1	3.2
Glyptothorax botius		Sisoridae	demersal	9.1	3.2
Glyptothorax indicus		Sisoridae	benthopelagic	13.4	3.2
Glyptothorax lonah		Sisoridae	benthopelagic	15	3.2
Glyptothorax stolickae		Sisoridae	benthopelagic	9	3.2
Glyptothorax telchitta		Sisoridae	benthopelagic	10	3.2
Gogangra viridescens		Sisoridae	demersal	8.5	3.2
Nangra assamensis	Koshi Nangra	Sisoridae	demersal	11.2	3.2
Nangra bucculenta		Sisoridae	benthopelagic	4.2	3.1
Nangra nangra		Sisoridae	demersal	5.5	3.2
Pseudecheneis crassicauda		Sisoridae	demersal	16.7	3.2
Pseudecheneis sulcata	Sucker throat catfish	Sisoridae	demersal	20	3.2
Pseudecheneis suppaetula		Sisoridae	demersal	10.3	3.2
Sisor rabdophorus		Sisoridae	demersal	22	3.4
Sisor rheophilus		Sisoridae	demersal	15.5	3.3
Sisor torosus		Sisoridae	demersal	11.6	3.3
			Means	41.4789	3.19341

## Sheet: Table 3
Data from FishBase (version (06/2014). www.fishbase.org
Amazone
Species	Name	Family	Habitat	Length (cm)	Trophic Level
Acestrorhynchus abbreviatus		Acestrorhynchidae	benthopelagic	26.8	4.1
Acestrorhynchus altus		Acestrorhynchidae	benthopelagic	28.4	4.2
Acestrorhynchus falcatus		Acestrorhynchidae	benthopelagic	33.2	4.2
Acestrorhynchus falcirostris		Acestrorhynchidae	benthopelagic	40	3.8
Acestrorhynchus grandoculis		Acestrorhynchidae	benthopelagic	13.2	3.8
Acestrorhynchus heterolepis		Acestrorhynchidae	benthopelagic	39.2	4.2
Acestrorhynchus lacustris		Acestrorhynchidae	benthopelagic	32.9	4.2
Acestrorhynchus maculipinna		Acestrorhynchidae	benthopelagic	9.6	3.7
Acestrorhynchus microlepis	Pike characin	Acestrorhynchidae	benthopelagic	31.7	4.3
Acestrorhynchus minimus		Acestrorhynchidae	benthopelagic	7.7	3.6
Acestrorhynchus nasutus		Acestrorhynchidae	benthopelagic	8.4	3.6
Gnathocharax steindachneri		Acestrorhynchidae	pelagic	6.1	3.4
Heterocharax leptogrammus		Acestrorhynchidae	benthopelagic	4.1	3.3
Heterocharax macrolepis		Acestrorhynchidae	benthopelagic	5.8	3.4
Heterocharax virgulatus		Acestrorhynchidae	benthopelagic	5.1	3.3
Hoplocharax goethei		Acestrorhynchidae	benthopelagic	3.7	3.2
Roestes ogilviei		Acestrorhynchidae	benthopelagic	22.8	4
Apionichthys dumerili	Longtail sole	Achiridae	demersal	15.1	3.3
Apionichthys finis		Achiridae	demersal	10.7	3.3
Apionichthys menezesi		Achiridae	demersal	7.3	3.2
Apionichthys nattereri		Achiridae	demersal	28.5	3.4
Apionichthys rosai		Achiridae	demersal	4.2	3.1
Apionichthys seripierriae		Achiridae	demersal	10.7	3.3
Hypoclinemus mentalis		Achiridae	demersal	16.6	3.3
Pnictes asphyxiatus		Achiridae	demersal	11.7	3.3
Abramites hypselonotus	Marbled headstander	Anostomidae	pelagic	14	2.9
Anostomus anostomus	Striped headstander	Anostomidae	benthopelagic	16	3
Anostomus longus		Anostomidae	benthopelagic	14.2	2.5
Anostomus ternetzi		Anostomidae	benthopelagic	12	2.6
Hypomasticus lineomaculatus		Anostomidae	benthopelagic	7.8
Laemolyta fasciata		Anostomidae	benthopelagic	25.2	2.3
Laemolyta fernandezi		Anostomidae	benthopelagic	30.5	2.4
Laemolyta garmani		Anostomidae	benthopelagic	26.1	2.3
Laemolyta taeniata		Anostomidae	benthopelagic	35.1	2.2
Leporellus vittatus		Anostomidae	benthopelagic	36.6	2.3
Leporinus acutidens		Anostomidae	benthopelagic	33	2
Leporinus affinis		Anostomidae	benthopelagic	25	2.3
Leporinus agassizii		Anostomidae	benthopelagic	28.5	2.1
Leporinus alternus		Anostomidae	benthopelagic	25.4	2.1
Leporinus cylindriformis		Anostomidae	benthopelagic	25.4	2.1
Leporinus fasciatus	Banded leporinus	Anostomidae	benthopelagic	30	3
Leporinus holostictus		Anostomidae	benthopelagic	25.4	2.1
Leporinus jamesi		Anostomidae	pelagic	18.8	2.1
Leporinus klausewitzi		Anostomidae	benthopelagic	25.4	2.1
Leporinus moralesi		Anostomidae	benthopelagic	30	2.1
Leporinus multifasciatus		Anostomidae	benthopelagic	25.4	2.1
Leporinus nattereri		Anostomidae	benthopelagic	25.4	2.1
Leporinus pachyurus		Anostomidae	benthopelagic	25.4	2.1
Leporinus parae		Anostomidae	pelagic	27.9	2.1
Leporinus paralternus		Anostomidae	benthopelagic	25.4	2.1
Leporinus pellegrinii		Anostomidae	benthopelagic	12	2
Leporinus striatus		Anostomidae	benthopelagic	25	2
Leporinus trifasciatus		Anostomidae	benthopelagic	29	2
Leporinus wolfei		Anostomidae	benthopelagic	30	2.1
Leporinus y-ophorus		Anostomidae	benthopelagic	25.4	2.1
Petulanos intermedius		Anostomidae	benthopelagic	13.5	2.5
Pseudanos gracilis		Anostomidae	benthopelagic	22.1	2.4
Pseudanos trimaculatus	Threespot headstander	Anostomidae	benthopelagic	19.1	2
Rhytiodus argenteofuscus		Anostomidae	benthopelagic	36.6	2.4
Rhytiodus microlepis		Anostomidae	benthopelagic	36.6	2
Schizodon fasciatus		Anostomidae	benthopelagic	40	2.5
Schizodon vittatus		Anostomidae	benthopelagic	36.8	2.4
Adontosternarchus balaenops		Apteronotidae	benthopelagic	25	3.3
Adontosternarchus devenanzii		Apteronotidae	benthopelagic	18.6	3.3
Adontosternarchus duartei		Apteronotidae	benthopelagic	18.5
Adontosternarchus nebulosus		Apteronotidae	demersal	21.8	3.3
Apteronotus albifrons	Black ghost	Apteronotidae	benthopelagic	50	3
Apteronotus bonapartii		Apteronotidae	benthopelagic	27	3.3
Apteronotus lindalvae		Apteronotidae	benthopelagic	33.3
Apteronotus macrolepis		Apteronotidae	benthopelagic	18	3.3
Compsaraia compsus		Apteronotidae	benthopelagic	33.9	3.3
Magosternarchus duccis		Apteronotidae	benthopelagic	22.6	3.3
Magosternarchus raptor		Apteronotidae	benthopelagic	19.9	3.3
Orthosternarchus tamandua		Apteronotidae	benthopelagic	44	3.4
Parapteronotus hasemani		Apteronotidae	benthopelagic	38.1	3.3
Pariosternarchus amazonensis		Apteronotidae	benthopelagic	18.5	3.3
Platyurosternarchus crypticus		Apteronotidae	benthopelagic	30.8
Platyurosternarchus macrostomus		Apteronotidae	benthopelagic	40	3.3
Porotergus gimbeli		Apteronotidae	benthopelagic	24	3.3
Sternarchella calhamazon		Apteronotidae	benthopelagic	18.5
Sternarchella schotti		Apteronotidae	benthopelagic	40	3.3
Sternarchella sima		Apteronotidae	benthopelagic	40	3.3
Sternarchella terminalis		Apteronotidae	benthopelagic	22.4	3.3
Sternarchogiton labiatus		Apteronotidae	pelagic	21.4	3.3
Sternarchogiton nattereri		Apteronotidae	benthopelagic	25	3.3
Sternarchogiton porcinum		Apteronotidae	benthopelagic	30	3.3
Sternarchogiton preto		Apteronotidae	pelagic	26.5	3.3
Sternarchorhamphus muelleri		Apteronotidae	benthopelagic	45.5	3.4
Sternarchorhynchus caboclo	Cabocolo tube-snouted ghost knifefish	Apteronotidae	benthopelagic	22.6	3.3
Sternarchorhynchus curumim	Curumim tube-snouted ghost knifefish	Apteronotidae	benthopelagic	18.1	3.3
Sternarchorhynchus curvirostris		Apteronotidae	benthopelagic	40.6	3.3
Sternarchorhynchus higuchii	Higuchi’s tube-snouted ghost knifefish	Apteronotidae	benthopelagic	24.6
Sternarchorhynchus jaimei	Jamei’s tube-snouted ghost knifefish	Apteronotidae	benthopelagic	20
Sternarchorhynchus montanus	Montanus tube-snouted ghost knifefish	Apteronotidae	benthopelagic	25.8
Sternarchorhynchus mormyrus	Mormyrus tube-snouted ghost knifefish	Apteronotidae	benthopelagic	54	3.4
Sternarchorhynchus oxyrhynchus	Oxyrhynchus tube-snouted ghost knifefish	Apteronotidae	benthopelagic	47	3.4
Sternarchorhynchus retzeri	Retzer’s tube-snouted ghost knifefish	Apteronotidae	benthopelagic	38.2
Sternarchorhynchus roseni	Rosen’s tube-snouted ghost knifefish	Apteronotidae	benthopelagic	41.7	3.3
Sternarchorhynchus severii	Severi’s tube-snouted ghost knifefish	Apteronotidae	benthopelagic	16.9	3.3
Sternarchorhynchus stewarti	Stewart’s tube-snouted ghost knifefish	Apteronotidae	benthopelagic	22.9
Arapaima gigas	Arapaima	Arapaimidae	demersal	450	4.5
Amphiarius rugispinis	Softhead sea catfish	Ariidae	demersal	45	3.6
Aspistor quadriscutis	Bressou sea catfish	Ariidae	benthopelagic	50	3.5
Bagre bagre	Coco sea catfish	Ariidae	demersal	55	4
Sciades couma	Couma sea catfish	Ariidae	demersal	97	3.4
Amaralia hypsiura		Aspredinidae	demersal	16.2	3.2
Aspredo aspredo	Banjo	Aspredinidae	demersal	46.7	3.3
Bunocephalus aleuropsis		Aspredinidae	demersal	11.1	2.6
Bunocephalus coracoideus	Guitarrita	Aspredinidae	demersal	13.4	3.8
Bunocephalus knerii	Ecuador banjo catfish	Aspredinidae	demersal	15.9	3.2
Bunocephalus verrucosus	Gnarled catfish	Aspredinidae	demersal	11.6	3.1
Micromyzon akamai		Aspredinidae	demersal	1.9	3
Pseudobunocephalus amazonicus		Aspredinidae	demersal	5.5	3.1
Pseudobunocephalus bifidus		Aspredinidae	demersal	5.3	3.1
Pseudobunocephalus quadriradiatus		Aspredinidae	demersal	3.9	3
Pterobunocephalus depressus		Aspredinidae	demersal	10.9	3.1
Pterobunocephalus dolichurus		Aspredinidae	demersal	8.2	3.1
Xyliphius lepturus		Aspredinidae	demersal	16.1	3.2
Xyliphius melanopterus		Aspredinidae	demersal	17.9	3.2
Astroblepus boulengeri		Astroblepidae	benthopelagic	8.5	3.3
Astroblepus festae		Astroblepidae	demersal	12.2	3.4
Ageneiosus atronasus		Auchenipteridae	pelagic	14.6	3.5
Ageneiosus brevis		Auchenipteridae	pelagic	19.5	3.6
Ageneiosus ucayalensis		Auchenipteridae	pelagic	35.4	3.7
Ageneiosus uranophthalmus		Auchenipteridae	demersal	31.9
Ageneiosus vittatus		Auchenipteridae	pelagic	26.8	3.7
Auchenipterichthys coracoideus		Auchenipteridae	demersal	12.2	3.4
Auchenipterichthys longimanus		Auchenipteridae	benthopelagic	18.3	3.4
Auchenipterichthys punctatus		Auchenipteridae	benthopelagic	18.4	2.7
Auchenipterichthys thoracatus		Auchenipteridae	benthopelagic	11	3.3
Auchenipterus brachyurus		Auchenipteridae	benthopelagic	20.1	3.5
Auchenipterus britskii		Auchenipteridae	benthopelagic	17.1	3.5
Auchenipterus fordicei		Auchenipteridae	benthopelagic	12.1	3.4
Auchenipterus nuchalis		Auchenipteridae	pelagic	18.8	3.6
Auchenipterus osteomystax		Auchenipteridae	benthopelagic	32.9	3.6
Centromochlus existimatus		Auchenipteridae	demersal	8.1	3.3
Centromochlus heckelii		Auchenipteridae	demersal	8.5	3.3
Centromochlus perugiae		Auchenipteridae	benthopelagic	6.1	3.2
Entomocorus melaphareus		Auchenipteridae	demersal	7.2	3.3
Epapterus dispilurus		Auchenipteridae	demersal	15.9	4.2
Gelanoglanis nanonocticolus		Auchenipteridae	pelagic	2.7	3
Gelanoglanis travieso		Auchenipteridae	demersal	3.5	3.1
Pseudepapterus cucuhyensis		Auchenipteridae	demersal	7.2	3.3
Pseudepapterus hasemani		Auchenipteridae	demersal	12.1	3.3
Spinipterus acsi		Auchenipteridae	benthopelagic	3.9
Tatia aulopygia		Auchenipteridae	benthopelagic	19.4	3.4
Tatia brunnea		Auchenipteridae	benthopelagic	14.1	3.3
Tatia caxiuanensis		Auchenipteridae	demersal	5	3.2
Tatia dunni		Auchenipteridae	demersal	14.6	3.3
Tatia gyrina		Auchenipteridae	benthopelagic	5.1	3.2
Tatia intermedia		Auchenipteridae	benthopelagic	14.6	3.5
Tatia nigra		Auchenipteridae	demersal	14.3	3.3
Tatia strigata		Auchenipteridae	benthopelagic	14.3	3.2
Tetranematichthys barthemi		Auchenipteridae	demersal	21.4
Tetranematichthys quadrifilis		Auchenipteridae	demersal	19.5	3.4
Trachelyichthys exilis		Auchenipteridae	demersal	9.8	3.3
Trachelyopterichthys taeniatus	Striped woodcat	Auchenipteridae	demersal	15	3.4
Trachelyopterus brevibarbis		Auchenipteridae	demersal	21.9	3.5
Trachelyopterus coriaceus		Auchenipteridae	demersal	18	3.4
Trachelyopterus galeatus		Auchenipteridae	demersal	26.8	3.1
Trachelyopterus isacanthus		Auchenipteridae	demersal	21.9	3.5
Trachycorystes trachycorystes	Black catfish	Auchenipteridae	demersal	42.7	3.6
Potamobatrachus trispinosus		Batrachoididae	demersal	6.1	3.3
Thalassophryne amazonica		Batrachoididae	demersal	11.4	3.4
Belonion apodion		Belonidae	benthopelagic	6.1	3.4
Potamorrhaphis guianensis		Belonidae	pelagic	29.1	3.9
Potamorrhaphis labiatus		Belonidae	pelagic	29
Pseudotylosurus angusticeps		Belonidae	pelagic	36.4	4
Pseudotylosurus microps		Belonidae	pelagic	49.7	4.1
Brycon amazonicus		Bryconidae	benthopelagic	56.4	3
Brycon cephalus		Bryconidae	benthopelagic	45	2
Brycon falcatus		Bryconidae	benthopelagic	37	2.6
Brycon melanopterus		Bryconidae	benthopelagic	36.6	2.5
Brycon pesu	Mourning tetra	Bryconidae	benthopelagic	14.6	2.8
Salminus affinis		Bryconidae	benthopelagic	12.2	3
Salminus hilarii		Bryconidae	benthopelagic	61	3
Brochis multiradiatus	Hognosed brochis	Callichthyidae	demersal	8.2	3
Callichthys serralabium		Callichthyidae	demersal	19.3	2.9
Corydoras acutus	Blacktop corydoras	Callichthyidae	demersal	5.4	3
Corydoras agassizii		Callichthyidae	demersal	6.3	3
Corydoras ambiacus	Spotted corydoras	Callichthyidae	demersal	6	3
Corydoras amphibelus		Callichthyidae	demersal	5.8	3
Corydoras arcuatus	Skunk corydoras	Callichthyidae	demersal	4.9	3
Corydoras armatus		Callichthyidae	demersal	6.1	3
Corydoras atropersonatus		Callichthyidae	demersal	5.5	3
Corydoras bifasciatus	Twostripe corydoras	Callichthyidae	demersal	6.3	3
Corydoras elegans	Elegant corydoras	Callichthyidae	demersal	6.2	3
Corydoras eques		Callichthyidae	demersal	5.9	3
Corydoras evelynae		Callichthyidae	demersal	4.9	3
Corydoras fowleri		Callichthyidae	demersal	7.9	2.9
Corydoras gomezi		Callichthyidae	demersal	4.6	3
Corydoras gracilis		Callichthyidae	demersal	2.8	3
Corydoras griseus	Gray corydoras	Callichthyidae	demersal	5.1	3
Corydoras hastatus	Dwarf corydoras	Callichthyidae	demersal	2.9	3
Corydoras julii	Leopard corydoras	Callichthyidae	demersal	6.3	3
Corydoras leopardus		Callichthyidae	demersal	7.4	2.9
Corydoras leucomelas	False spotted catfish	Callichthyidae	demersal	5.5	3
Corydoras loretoensis		Callichthyidae	demersal	4.4	3
Corydoras melini	Bandit corydoras	Callichthyidae	demersal	6.1	3
Corydoras napoensis		Callichthyidae	demersal	5.1	3
Corydoras narcissus		Callichthyidae	demersal	7.9	2.9
Corydoras panda	Panda corydoras	Callichthyidae	demersal	4.6	3
Corydoras pinheiroi		Callichthyidae	demersal	6.9	2.9
Corydoras punctatus	Spotfin corydoras	Callichthyidae	demersal	8.1	2.9
Corydoras rabauti	Rust corydoras	Callichthyidae	demersal	6.1	3
Corydoras reticulatus	Reticulated corydoras	Callichthyidae	demersal	7.4	2.9
Corydoras robustus		Callichthyidae	demersal	8.7	2.9
Corydoras semiaquilus		Callichthyidae	demersal	7.3	2.9
Corydoras sodalis	False network catfish	Callichthyidae	demersal	5.9	3
Corydoras splendens	Emerald catfish	Callichthyidae	demersal	7.4	3.3
Corydoras trilineatus	Threestripe corydoras	Callichthyidae	demersal	7.4	2.9
Corydoras weitzmani	Twosaddle corydoras	Callichthyidae	demersal	5.8	3
Corydoras zygatus	Black band catfish	Callichthyidae	demersal	6.8	2.9
Dianema longibarbis	Porthole catfish	Callichthyidae	demersal	10	2.9
Dianema urostriatum	Flagtail catfish	Callichthyidae	demersal	10.3	2.9
Hoplosternum littorale	Atipa	Callichthyidae	demersal	24	2.7
Lepthoplosternum altamazonicum		Callichthyidae	demersal	6.1	2.9
Lepthoplosternum ucamara		Callichthyidae	benthopelagic	5.6	2.9
Megalechis picta	Spotted hoplo	Callichthyidae	demersal	18.9	2.9
Megalechis thoracata		Callichthyidae	demersal	15.1	2.9
Cetopsidium ferreirai		Cetopsidae	benthopelagic	4.5	3.3
Cetopsidium minutum		Cetopsidae	demersal	6	3.4
Cetopsis candiru		Cetopsidae	benthopelagic	32.1	3.9
Cetopsis coecutiens		Cetopsidae	benthopelagic	32.3	3.9
Cetopsis montana		Cetopsidae	benthopelagic	14.5	3.7
Cetopsis oliveirai		Cetopsidae	demersal	4.4	3.3
Cetopsis parma		Cetopsidae	benthopelagic	20.7	3.8
Cetopsis plumbea		Cetopsidae	demersal	14.4	3.7
Cetopsis sandrae		Cetopsidae	benthopelagic	9.1	3.5
Denticetopsis seducta		Cetopsidae	benthopelagic	6.2	3.4
Helogenes marmoratus		Cetopsidae	demersal	8.9	3.5
Acestrocephalus boehlkei		Characidae	benthopelagic	16.5	3.8
Acrobrycon ipanquianus		Characidae	benthopelagic	12.2	3.4
Aphyocharax agassizii		Characidae	benthopelagic	4.1	3
Aphyocharax alburnus	Goldencrown tetra	Characidae	benthopelagic	5.6	3
Aphyocharax nattereri		Characidae	benthopelagic	3.8	3
Aphyocharax pusillus		Characidae	benthopelagic	7.8	3
Astyanax abramis		Characidae	benthopelagic	17.1	2.8
Astyanax ajuricaba		Characidae	benthopelagic	11.6
Astyanax anterior		Characidae	benthopelagic	13.6	2.8
Astyanax argyrimarginatus		Characidae	benthopelagic	10.4	2.8
Astyanax bimaculatus	Twospot astyanax	Characidae	benthopelagic	17.5	2.2
Astyanax bourgeti		Characidae	benthopelagic	10.4	2.8
Astyanax clavitaeniatus		Characidae	benthopelagic	8.8	2.8
Astyanax gracilior		Characidae	benthopelagic	10.4	2.8
Astyanax kennedyi		Characidae	benthopelagic	10.4	2.8
Astyanax longior		Characidae	benthopelagic	10.4	2.8
Astyanax maximus		Characidae	benthopelagic	15.1	2.7
Astyanax multidens		Characidae	benthopelagic	10.4	2.8
Astyanax poetzschkei		Characidae	benthopelagic	10.4	2.8
Astyanax stilbe		Characidae	benthopelagic	10.4	2.8
Astyanax symmetricus		Characidae	benthopelagic	10.4	2.8
Axelrodia lindeae		Characidae	benthopelagic	2.5	3
Axelrodia stigmatias		Characidae	benthopelagic	2.5	3
Bario steindachneri		Characidae	pelagic	11	3
Boehlkea fredcochui	Cochu's blue tetra	Characidae	benthopelagic	5	3
Brachychalcinus copei		Characidae	benthopelagic	8.9	3.2
Brachychalcinus nummus		Characidae	benthopelagic	10.3	3.3
Bryconacidnus ellisi		Characidae	pelagic	4.6	3
Bryconacidnus paipayensis		Characidae	pelagic	6.1	3
Bryconamericus alfredae		Characidae	benthopelagic	6.6	2.7
Bryconamericus carlosi		Characidae	benthopelagic	6.9	2.7
Bryconamericus caucanus		Characidae	benthopelagic	8.8	2.6
Bryconamericus diaphanus		Characidae	benthopelagic	5	2.8
Bryconamericus grosvenori		Characidae	benthopelagic	7	2.7
Bryconamericus oroensis		Characidae	benthopelagic	11.8
Bryconamericus osgoodi		Characidae	benthopelagic	7.4	2.7
Bryconamericus pachacuti		Characidae	benthopelagic	7.5	2.7
Bryconamericus peruanus		Characidae	benthopelagic	11.2	2.5
Bryconamericus phoenicopterus		Characidae	benthopelagic	6	2.7
Bryconamericus simus		Characidae	benthopelagic	8.7	2.6
Bryconamericus thomasi		Characidae	benthopelagic	8.5	2.6
Bryconamericus zamorensis		Characidae	benthopelagic	7.9
Bryconella pallidifrons		Characidae	pelagic	2.8	3
Bryconexodon juruenae		Characidae	benthopelagic	15.3	3
Ceratobranchia binghami		Characidae	pelagic	6.5	3
Ceratobranchia delotaenia		Characidae	pelagic	4.6	3
Ceratobranchia elatior		Characidae	pelagic	6.3	3
Ceratobranchia obtusirostris		Characidae	pelagic	6.7	3
Chalceus epakros		Characidae	benthopelagic	27.9	3
Chalceus erythrurus	Tucan fish	Characidae	pelagic	26	3
Chalceus macrolepidotus	Pinktail chalceus	Characidae	pelagic	29.8	3.4
Charax condei		Characidae	benthopelagic	6.6	4.2
Charax hemigrammus		Characidae	benthopelagic	4	3.3
Charax pauciradiatus		Characidae	benthopelagic	12.3	3.7
Charax tectifer		Characidae	benthopelagic	12.2	3.7
Charax unimaculatus		Characidae	benthopelagic	10.5	3.6
Cheirodon luelingi		Characidae	benthopelagic	2.2	3
Chrysobrycon hesperus		Characidae	pelagic	10	3.4
Chrysobrycon myersi		Characidae	pelagic	6	3.3
Creagrutus amoenus		Characidae	benthopelagic	11.1	2.2
Creagrutus barrigai		Characidae	benthopelagic	6.5	2.5
Creagrutus beni	Goldstripe characin	Characidae	benthopelagic	8.9	2.3
Creagrutus cochui		Characidae	benthopelagic	9.6	2.3
Creagrutus melanzonus		Characidae	benthopelagic	4.4	2.6
Creagrutus peruanus		Characidae	benthopelagic	10.6	2.3
Ctenobrycon hauxwellianus		Characidae	pelagic	9.8	2.5
Cynopotamus amazonum		Characidae	benthopelagic	20.7	3.9
Exodon paradoxus	Bucktooth tetra	Characidae	pelagic	9.1	3.8
Galeocharax gulo		Characidae	benthopelagic	26.8	4
Gymnocorymbus thayeri	False black tetra	Characidae	pelagic	6.1	3
Hemibrycon helleri		Characidae	benthopelagic	12.2	3
Hemibrycon huambonicus		Characidae	benthopelagic	14.5	3
Hemibrycon jelskii		Characidae	benthopelagic	12.4	3
Hemibrycon polyodon		Characidae	benthopelagic	20.5	3
Hemibrycon tridens	Jumping tetra	Characidae	benthopelagic	7.9	3
Hemigrammus analis		Characidae	benthopelagic	3.6	3
Hemigrammus arua		Characidae	benthopelagic	3.7
Hemigrammus bellottii		Characidae	benthopelagic	3.2	3.2
Hemigrammus boesemani		Characidae	benthopelagic	4	3
Hemigrammus coeruleus		Characidae	benthopelagic	5.8	3
Hemigrammus cupreus		Characidae	benthopelagic	5.3	3
Hemigrammus diagonicus		Characidae	pelagic	3.4
Hemigrammus elegans		Characidae	benthopelagic	4.9	3
Hemigrammus gracilis		Characidae	benthopelagic	5.4	3
Hemigrammus haraldi		Characidae	benthopelagic	3.3	3
Hemigrammus hyanuary	January tetra	Characidae	benthopelagic	4.4	3
Hemigrammus levis		Characidae	benthopelagic	4.8	3
Hemigrammus luelingi		Characidae	benthopelagic	3.1	3
Hemigrammus lunatus		Characidae	benthopelagic	4.8	3
Hemigrammus marginatus		Characidae	benthopelagic	5.5	2.8
Hemigrammus microstomus		Characidae	benthopelagic	4.9	3
Hemigrammus mimus		Characidae	benthopelagic	3.5	3
Hemigrammus neptunus		Characidae	benthopelagic	3.9	3
Hemigrammus ocellifer	Head-and-taillight tetra	Characidae	benthopelagic	4.4	3.2
Hemigrammus pretoensis		Characidae	benthopelagic	5.5	3
Hemigrammus pulcher	Garnet tetra	Characidae	benthopelagic	4	2.8
Hemigrammus rhodostomus	Rummy-nose tetra	Characidae	benthopelagic	5	3
Hemigrammus rodwayi		Characidae	benthopelagic	5.3	3
Hemigrammus schmardae		Characidae	benthopelagic	4.5	3
Hemigrammus stictus		Characidae	benthopelagic	4.3	3
Hemigrammus unilineatus	Featherfin tetra	Characidae	benthopelagic	5.3	3.4
Hyphessobrycon agulha		Characidae	benthopelagic	5.1	2.9
Hyphessobrycon amaronensis		Characidae	pelagic	3.3
Hyphessobrycon bentosi	Ornate tetra	Characidae	benthopelagic	5.3	2.9
Hyphessobrycon copelandi		Characidae	benthopelagic	4.2	2.9
Hyphessobrycon eques	Jewel tetra	Characidae	benthopelagic	4.9	3.1
Hyphessobrycon erythrostigma	Bleeding-heart tetra	Characidae	benthopelagic	7.4	2.8
Hyphessobrycon gracilior		Characidae	benthopelagic	2.6	3
Hyphessobrycon heterorhabdus	Flag tetra	Characidae	benthopelagic	3.6	2.9
Hyphessobrycon hildae		Characidae	benthopelagic	2.3	3
Hyphessobrycon loretoensis	Loreto tetra	Characidae	benthopelagic	2.9	3
Hyphessobrycon melazonatus		Characidae	benthopelagic	3.8	2.9
Hyphessobrycon peruvianus	Peruvian tetra	Characidae	benthopelagic	3.4	2.9
Hyphessobrycon pulchripinnis	Lemon tetra	Characidae	benthopelagic	4.6	2.9
Hyphessobrycon pyrrhonotus		Characidae	benthopelagic	5.5	2.9
Hyphessobrycon robustulus		Characidae	benthopelagic	4.4	2.9
Hyphessobrycon rosaceus	Rosy tetra	Characidae	benthopelagic	4.2	2.9
Hyphessobrycon scholzei	Blackline tetra	Characidae	benthopelagic	4	2.9
Hyphessobrycon socolofi	Spotfin tetra	Characidae	benthopelagic	6.9	2.9
Hyphessobrycon stramineus		Characidae	benthopelagic	3.8	2.9
Hyphessobrycon sweglesi	Red phantom tetra	Characidae	benthopelagic	3.9	3.2
Hyphessobrycon taguae		Characidae	pelagic	3.7
Hyphessobrycon takasei	Coffee-bean tetra	Characidae	benthopelagic	3.7	2.9
Hyphessobrycon tenuis		Characidae	benthopelagic	3.2	3
Hyphessobrycon tukunai		Characidae	benthopelagic	2.5	3
Jupiaba anteroides		Characidae	benthopelagic	9.1	2.9
Jupiaba asymmetrica		Characidae	benthopelagic	8.1	2.9
Jupiaba zonata		Characidae	benthopelagic	5.8	2.9
Knodus breviceps		Characidae	benthopelagic	8.7	2.8
Knodus caquetae		Characidae	benthopelagic	7.9	2.8
Knodus delta		Characidae	benthopelagic	4.4	2.9
Knodus gamma		Characidae	benthopelagic	5.9	2.8
Knodus hypopterus		Characidae	benthopelagic	4.4	2.8
Knodus megalops		Characidae	benthopelagic	5.9	2.8
Knodus moenkhausii		Characidae	benthopelagic	4.5	2.6
Leptagoniates steindachneri		Characidae	pelagic	9.3	3
Leptobrycon jatuaranae		Characidae	benthopelagic	7.9	3
Microgenys lativirgata		Characidae	benthopelagic	8.7	3
Microgenys weyrauchi		Characidae	benthopelagic	3.4	3
Microschemobrycon callops		Characidae	benthopelagic	3.7	3
Microschemobrycon geisleri		Characidae	benthopelagic	3.3	3
Moenkhausia agnesae		Characidae	benthopelagic	8.4	3.4
Moenkhausia atahualpiana		Characidae	benthopelagic	7.7	3.3
Moenkhausia barbouri		Characidae	benthopelagic	6.5	3.3
Moenkhausia celibela		Characidae	benthopelagic	5
Moenkhausia ceros		Characidae	benthopelagic	5	3.2
Moenkhausia chrysargyrea		Characidae	benthopelagic	14.6	3.5
Moenkhausia collettii		Characidae	benthopelagic	6.1	3.4
Moenkhausia comma		Characidae	benthopelagic	9	3.4
Moenkhausia copei		Characidae	benthopelagic	7.3	3.3
Moenkhausia cotinho		Characidae	benthopelagic	6.2	3.3
Moenkhausia dichroura	Bandtail tetra	Characidae	benthopelagic	12.2	3.5
Moenkhausia diktyota		Characidae	pelagic	6.4	3.3
Moenkhausia dorsinuda		Characidae	benthopelagic	8.7	3.4
Moenkhausia gracilima		Characidae	benthopelagic	7.2	3.3
Moenkhausia grandisquamis		Characidae	benthopelagic	12.2	3.5
Moenkhausia intermedia		Characidae	benthopelagic	9.8	2.7
Moenkhausia jamesi		Characidae	benthopelagic	8.3	3.4
Moenkhausia justae		Characidae	benthopelagic	7.3	3.3
Moenkhausia latissima		Characidae	pelagic	11.2	3.4
Moenkhausia lepidura		Characidae	benthopelagic	10.9	3.5
Moenkhausia levidorsa		Characidae	pelagic	7.8	3.3
Moenkhausia margitae		Characidae	benthopelagic	7.8	3.3
Moenkhausia megalops		Characidae	benthopelagic	6.1	3.3
Moenkhausia melogramma		Characidae	benthopelagic	4.9	3.2
Moenkhausia mikia		Characidae	demersal	9.6
Moenkhausia naponis		Characidae	benthopelagic	6.6	3.3
Moenkhausia newtoni		Characidae	benthopelagic	3.3	3.1
Moenkhausia oligolepis	Glass tetra	Characidae	benthopelagic	12.2	3.5
Moenkhausia ovalis		Characidae	benthopelagic	9.8	3.4
Moenkhausia robertsi		Characidae	benthopelagic	6	3.3
Moenkhausia simulata		Characidae	benthopelagic	8.8	3.4
Moenkhausia takasei	Black-jacket tetra	Characidae	benthopelagic	4	3.2
Moenkhausia tridentata		Characidae	benthopelagic	7.7	3.3
Odontostilbe dierythrura		Characidae	benthopelagic	4.7	2.5
Odontostilbe fugitiva		Characidae	benthopelagic	4.5	2.5
Othonocheirodus eigenmanni		Characidae	benthopelagic	7.9	3
Oxybrycon parvulus		Characidae	pelagic	2	3
Paragoniates alburnus		Characidae	demersal	6	3
Petitella georgiae	False rummynose tetra	Characidae	pelagic	4.7	3
Phenacogaster beni		Characidae	benthopelagic	4.5	3.3
Phenacogaster pectinatus		Characidae	benthopelagic	5.5	3.4
Phenacogaster prolatus		Characidae	pelagic	6.1
Piabarchus analis		Characidae	benthopelagic	4.5	3
Poptella brevispina		Characidae	benthopelagic	9.3	3.5
Poptella compressa		Characidae	benthopelagic	8.3	3.2
Priocharax pygmaeus		Characidae	benthopelagic	2	3
Prionobrama filigera	Glass bloodfin	Characidae	pelagic	6	3
Pristella maxillaris	X-ray tetra	Characidae	pelagic	4.5	3.2
Prodontocharax alleni		Characidae	benthopelagic	5.4	2.4
Prodontocharax howesi		Characidae	benthopelagic	5.1	2.5
Prodontocharax melanotus		Characidae	benthopelagic	5.9	2.4
Ptychocharax rhyacophila		Characidae	pelagic	7.6	3.3
Roeboexodon geryi		Characidae	benthopelagic	18.3	3
Roeboides affinis		Characidae	benthopelagic	13.4	3.7
Roeboides biserialis		Characidae	benthopelagic	5.9	3.5
Roeboides microlepis		Characidae	benthopelagic	24.4	4
Roeboides myersii		Characidae	benthopelagic	22	4.2
Roeboides oligistos		Characidae	benthopelagic	8.5	3.6
Scopaeocharax atopodus		Characidae	pelagic	2.7	3.1
Scopaeocharax rhinodus		Characidae	pelagic	3	3.1
Serrapinnus heterodon		Characidae	pelagic	5	2.5
Serrapinnus micropterus		Characidae	benthopelagic	3.2	2.7
Stethaprion crenatum		Characidae	benthopelagic	10.4	3.3
Stethaprion erythrops		Characidae	benthopelagic	10.7	3.3
Stichonodon insignis		Characidae	benthopelagic	8	3
Tetragonopterus argenteus		Characidae	demersal	13.7	3
Tetragonopterus carvalhoi		Characidae	benthopelagic	5.6
Tetragonopterus chalceus		Characidae	demersal	12	3
Thayeria boehlkei	Blackline penguinfish	Characidae	pelagic	3.8	3.3
Thayeria ifati		Characidae	pelagic	4.3	3
Thayeria obliqua	Penguinfish	Characidae	pelagic	9.3	3
Tyttobrycon hamatus		Characidae	pelagic	2.1	3
Tyttocharax cochui		Characidae	pelagic	2.6	3.1
Tyttocharax madeirae	Blackedge tetra	Characidae	pelagic	2.5	3
Xenurobrycon heterodon		Characidae	benthopelagic	2.1	3
Xenurobrycon pteropus		Characidae	benthopelagic	1.6	3
Pseudoscopelus scriptus		Chiasmodontidae	bathypelagic	18.9	3.4
Caenotropus labyrinthicus		Chilodontidae	demersal	18.5	2.8
Chilodus gracilis		Chilodontidae	demersal	7.8	2.9
Chilodus punctatus	Spotted headstander	Chilodontidae	pelagic	9.6	2.8
Acarichthys heckelii	Threadfin acara	Cichlidae	benthopelagic	16.4	2.7
Acaronia nassa	Bigeye cichlid	Cichlidae	benthopelagic	18.8	3.7
Aequidens diadema		Cichlidae	benthopelagic	14.4	3.2
Aequidens epae		Cichlidae	benthopelagic	13.8	3.2
Aequidens gerciliae		Cichlidae	benthopelagic	15.6	3.1
Aequidens hoehnei		Cichlidae	benthopelagic	6.8	3.1
Aequidens mauesanus		Cichlidae	benthopelagic	16.4	3.2
Aequidens michaeli		Cichlidae	benthopelagic	20	3.2
Aequidens pallidus	Doublespot acara	Cichlidae	benthopelagic	17.5	3.2
Aequidens patricki		Cichlidae	benthopelagic	14.1	3.7
Aequidens plagiozonatus		Cichlidae	benthopelagic	12.6	3.2
Aequidens rondoni		Cichlidae	benthopelagic	11.8	3.2
Aequidens tetramerus	Saddle cichlid	Cichlidae	benthopelagic	19.8	3.2
Aequidens tubicen		Cichlidae	benthopelagic	14.1	3.2
Aequidens viridis		Cichlidae	benthopelagic	20.1	3.2
Apistogramma agassizii	Agassiz's dwarf cichlid	Cichlidae	benthopelagic	5.1	3.3
Apistogramma alacrina		Cichlidae	benthopelagic	6.7	3.3
Apistogramma amoena	Pleasant cichlid	Cichlidae	benthopelagic	6.3	3.2
Apistogramma arua		Cichlidae	benthopelagic	5.4	3.3
Apistogramma atahualpa		Cichlidae	benthopelagic	5.1	3.3
Apistogramma bitaeniata		Cichlidae	benthopelagic	5.6	3.3
Apistogramma brevis		Cichlidae	benthopelagic	4.8	3.3
Apistogramma cacatuoides	Cockatoo cichlid	Cichlidae	benthopelagic	6.1	3.3
Apistogramma cruzi		Cichlidae	benthopelagic	6.2	3.3
Apistogramma diplotaenia		Cichlidae	benthopelagic	4.5	3.2
Apistogramma elizabethae		Cichlidae	benthopelagic	4.9	3.3
Apistogramma eunotus		Cichlidae	benthopelagic	6.5	3.3
Apistogramma geisleri		Cichlidae	benthopelagic	3.4	3.2
Apistogramma gephyra		Cichlidae	benthopelagic	5.4	3.3
Apistogramma gibbiceps		Cichlidae	benthopelagic	5.4	3.3
Apistogramma hippolytae		Cichlidae	benthopelagic	5.4	3.3
Apistogramma inconspicua		Cichlidae	benthopelagic	5.4	3.3
Apistogramma juruensis		Cichlidae	benthopelagic	2.9	3.1
Apistogramma linkei		Cichlidae	benthopelagic	5.4	3.3
Apistogramma luelingi		Cichlidae	benthopelagic	4	3.2
Apistogramma meinkeni		Cichlidae	benthopelagic	5.4	3.3
Apistogramma mendezi		Cichlidae	benthopelagic	5.4	3.3
Apistogramma moae		Cichlidae	benthopelagic	6.1	3.3
Apistogramma nijsseni		Cichlidae	benthopelagic	4.8	3.3
Apistogramma norberti		Cichlidae	benthopelagic	4.8	3.3
Apistogramma panduro		Cichlidae	benthopelagic	6	3.3
Apistogramma paucisquamis		Cichlidae	benthopelagic	4.2	3.2
Apistogramma payaminonis		Cichlidae	benthopelagic	4.9	3.3
Apistogramma personata		Cichlidae	benthopelagic	6	3.3
Apistogramma pertensis	Amazon dwarf cichlid	Cichlidae	benthopelagic	4.5	3.2
Apistogramma pulchra		Cichlidae	benthopelagic	3.9	3.2
Apistogramma regani		Cichlidae	benthopelagic	5.4	3.3
Apistogramma resticulosa		Cichlidae	benthopelagic	5.4	3.3
Apistogramma rupununi	Two-spot Apistogramma	Cichlidae	benthopelagic	5.4	3.3
Apistogramma staecki		Cichlidae	benthopelagic	5.4	3.3
Apistogramma taeniata		Cichlidae	benthopelagic	5.1	3.3
Apistogramma trifasciata		Cichlidae	benthopelagic	5.4	3.3
Apistogramma uaupesi		Cichlidae	benthopelagic	6	3.3
Apistogramma urteagai		Cichlidae	benthopelagic	5	3.3
Apistogrammoides pucallpaensis		Cichlidae	benthopelagic	3.3	3.1
Astronotus crassipinnis		Cichlidae	benthopelagic	29.3	3
Astronotus ocellatus	Oscar	Cichlidae	benthopelagic	45.7	2.8
Biotodoma cupido	Greenstreaked eartheater	Cichlidae	benthopelagic	11.8	3.3
Biotodoma wavrini	Orinoco eartheater	Cichlidae	benthopelagic	12.2	3.3
Biotoecus opercularis		Cichlidae	benthopelagic	10	3.3
Bujurquina apoparuana		Cichlidae	benthopelagic	9.4	3.4
Bujurquina cordemadi		Cichlidae	benthopelagic	7.6	3.3
Bujurquina eurhinus		Cichlidae	benthopelagic	10.9	3.5
Bujurquina hophrys		Cichlidae	benthopelagic	10.4	3.4
Bujurquina huallagae		Cichlidae	benthopelagic	10.1	4.2
Bujurquina labiosa		Cichlidae	benthopelagic	6.7	3.3
Bujurquina megalospilus		Cichlidae	benthopelagic	8.7	3.4
Bujurquina moriorum		Cichlidae	benthopelagic	11.8	3.2
Bujurquina ortegai		Cichlidae	benthopelagic	13.4	3.5
Bujurquina peregrinabunda		Cichlidae	benthopelagic	13.1	3.5
Bujurquina robusta		Cichlidae	benthopelagic	10.7	3.4
Bujurquina syspilus		Cichlidae	benthopelagic	12.6	3.5
Bujurquina tambopatae		Cichlidae	benthopelagic	10	3.4
Bujurquina zamorensis		Cichlidae	benthopelagic	9	3.4
Caquetaia myersi		Cichlidae	benthopelagic	23.2	3.2
Caquetaia spectabilis		Cichlidae	benthopelagic	20.1	3.3
Chaetobranchopsis australis		Cichlidae	benthopelagic	14.6	3.5
Chaetobranchopsis orbicularis		Cichlidae	benthopelagic	14.6	3
Chaetobranchus flavescens		Cichlidae	benthopelagic	26	3
Chaetobranchus semifasciatus		Cichlidae	benthopelagic	28.1	3
Cichla intermedia		Cichlidae	benthopelagic	55	4.1
Cichla monoculus		Cichlidae	benthopelagic	85.4	3.9
Cichla nigromaculata		Cichlidae	benthopelagic	32	4.1
Cichla orinocensis		Cichlidae	benthopelagic	75.3	4.4
Cichla pleiozona		Cichlidae	benthopelagic	41.5	4.2
Cichla temensis	Speckled pavon	Cichlidae	benthopelagic	99	4.5
Cichlasoma amazonarum		Cichlidae	benthopelagic	13.9	2.8
Cichlasoma araguaiense		Cichlidae	benthopelagic	11.2	3.4
Cichlasoma bimaculatum	Black acara	Cichlidae	benthopelagic	30	3.6
Cichlasoma boliviense		Cichlidae	benthopelagic	13.1	3.4
Crenicara latruncularium		Cichlidae	benthopelagic	10.9	3.3
Crenicara punctulatum	Checkerboard cichlid	Cichlidae	benthopelagic	12.2	3.3
Crenicichla acutirostris		Cichlidae	benthopelagic	23	3.2
Crenicichla adspersa		Cichlidae	benthopelagic	35.4	3.3
Crenicichla alta	Millet	Cichlidae	benthopelagic	19.5	3.2
Crenicichla anthurus		Cichlidae	benthopelagic	27.3	2.8
Crenicichla cametana		Cichlidae	benthopelagic	22.3	3.2
Crenicichla cincta		Cichlidae	benthopelagic	23.8	3.2
Crenicichla compressiceps		Cichlidae	benthopelagic	6.7	3.1
Crenicichla cyanonotus		Cichlidae	benthopelagic	18.1	3.2
Crenicichla cyclostoma		Cichlidae	benthopelagic	11.7	3.2
Crenicichla geayi	Halfbanded pike cichlid	Cichlidae	benthopelagic	15.9	3.2
Crenicichla heckeli		Cichlidae	benthopelagic	6.3	3.1
Crenicichla hemera		Cichlidae	benthopelagic	11.8	3.2
Crenicichla hummelincki		Cichlidae	benthopelagic	13.2	3.2
Crenicichla inpa		Cichlidae	benthopelagic	20.5	3.2
Crenicichla isbrueckeri		Cichlidae	benthopelagic	11.6	3.2
Crenicichla jegui		Cichlidae	benthopelagic	24.4	3.2
Crenicichla johanna		Cichlidae	benthopelagic	34.5	3.1
Crenicichla labrina		Cichlidae	benthopelagic	19.5	3.2
Crenicichla lenticulata		Cichlidae	benthopelagic	36.6	3.3
Crenicichla lepidota	Pike cichlid	Cichlidae	benthopelagic	22	3.6
Crenicichla lucius		Cichlidae	benthopelagic	20.5	3.2
Crenicichla lugubris		Cichlidae	benthopelagic	29.3	3.2
Crenicichla macrophthalma		Cichlidae	benthopelagic	24.4	3.2
Crenicichla marmorata		Cichlidae	benthopelagic	34.2	3.3
Crenicichla notophthalmus		Cichlidae	benthopelagic	9.3	3.1
Crenicichla pellegrini		Cichlidae	benthopelagic	19.1	3.2
Crenicichla percna		Cichlidae	benthopelagic	26.8	3.2
Crenicichla phaiospilus		Cichlidae	benthopelagic	29.3	3.2
Crenicichla proteus		Cichlidae	benthopelagic	18.9	3.2
Crenicichla pydanielae		Cichlidae	benthopelagic	21.7	3.2
Crenicichla regani		Cichlidae	benthopelagic	9.6	3.1
Crenicichla reticulata		Cichlidae	benthopelagic	26.4	3.2
Crenicichla rosemariae		Cichlidae	benthopelagic	29.8	3.2
Crenicichla santosi		Cichlidae	benthopelagic	14.6	3.2
Crenicichla sedentaria		Cichlidae	benthopelagic	27	3.8
Crenicichla semicincta		Cichlidae	benthopelagic	20.9	3.2
Crenicichla stocki		Cichlidae	benthopelagic	25	3.2
Crenicichla strigata		Cichlidae	benthopelagic	36.6	3.3
Crenicichla tigrina		Cichlidae	benthopelagic	34.2	3.3
Crenicichla urosema		Cichlidae	benthopelagic	8.3	3.1
Crenicichla virgatula		Cichlidae	benthopelagic	8.1	3.1
Dicrossus filamentosus	Chessboard cichlid	Cichlidae	benthopelagic	4.6	3.1
Dicrossus foirni		Cichlidae	benthopelagic	8.6
Dicrossus maculatus		Cichlidae	benthopelagic	6.4	3.2
Dicrossus warzeli		Cichlidae	benthopelagic	7.3
Geophagus altifrons		Cichlidae	benthopelagic	27.5	2.2
Geophagus argyrostictus		Cichlidae	benthopelagic	22	2.3
Geophagus megasema		Cichlidae	benthopelagic	21.4	2.3
Geophagus proximus		Cichlidae	benthopelagic	27.5	2.2
Guianacara geayi		Cichlidae	benthopelagic	10.4	3.3
Heroina isonycterina		Cichlidae	benthopelagic	12.4	3.2
Heros efasciatus		Cichlidae	benthopelagic	17.1	2.7
Heros notatus		Cichlidae	benthopelagic	18.3	2.8
Heros severus	Banded cichlid	Cichlidae	benthopelagic	24.4	2.8
Heros spurius		Cichlidae	benthopelagic	14.6	2.8
Hoplarchus psittacus		Cichlidae	benthopelagic	32	3.7
Hypselecara coryphaenoides		Cichlidae	benthopelagic	19.5	3.8
Hypselecara temporalis	Emerald cichlid	Cichlidae	benthopelagic	18.3	2.4
Laetacara curviceps	Flag acara	Cichlidae	benthopelagic	7.9	3.1
Laetacara dorsigera	Redbreast acara	Cichlidae	benthopelagic	7.3	3.1
Laetacara flavilabris		Cichlidae	benthopelagic	10	3.5
Laetacara thayeri		Cichlidae	benthopelagic	12	3.2
Mesonauta acora		Cichlidae	benthopelagic	8.7	3.3
Mesonauta festivus	Flag cichlid	Cichlidae	benthopelagic	10	2.5
Mesonauta guyanae		Cichlidae	benthopelagic	12.2	3.3
Mesonauta insignis		Cichlidae	benthopelagic	11.5	3.4
Mesonauta mirificus		Cichlidae	benthopelagic	11.8	3.3
Mikrogeophagus altispinosus		Cichlidae	benthopelagic	6.8	3.2
Nannacara adoketa		Cichlidae	benthopelagic	6	3.1
Pterophyllum altum		Cichlidae	benthopelagic	18	3.2
Pterophyllum leopoldi		Cichlidae	benthopelagic	6.1	3.1
Pterophyllum scalare	Freshwater angelfish	Cichlidae	benthopelagic	9.1	3.6
Retroculus lapidifer		Cichlidae	benthopelagic	24.8	3.4
Retroculus xinguensis		Cichlidae	benthopelagic	17.6	3.3
Satanoperca acuticeps	Sharphead eartheater	Cichlidae	benthopelagic	20.7	3.1
Satanoperca daemon	Threespot eartheater	Cichlidae	benthopelagic	20.7	3.1
Satanoperca jurupari	Demon eartheater	Cichlidae	benthopelagic	22.6	3.1
Satanoperca lilith		Cichlidae	benthopelagic	31.1	3.1
Satanoperca pappaterra	Pantanal eartheater	Cichlidae	benthopelagic	23.4	2.8
Symphysodon aequifasciatus	Blue discus	Cichlidae	benthopelagic	16.7	3.3
Symphysodon discus	Red discus	Cichlidae	benthopelagic	15	2.9
Symphysodon tarzoo		Cichlidae	benthopelagic	16.1
Taeniacara candidi		Cichlidae	benthopelagic	5	3.2
Tahuantinsuyoa chipi		Cichlidae	demersal	10	3.1
Tahuantinsuyoa macantzatza		Cichlidae	demersal	12	3.2
Teleocichla centisquama	Slender pike cichlid	Cichlidae	benthopelagic	4.9	3.2
Teleocichla centrarchus		Cichlidae	benthopelagic	7.3	3.3
Teleocichla cinderella		Cichlidae	benthopelagic	6.6	3.3
Teleocichla gephyrogramma		Cichlidae	benthopelagic	5.6	3.2
Teleocichla monogramma		Cichlidae	benthopelagic	7.7	3.3
Teleocichla prionogenys		Cichlidae	benthopelagic	6.9	3.3
Teleocichla proselytus		Cichlidae	benthopelagic	6.9	3.3
Uaru amphiacanthoides	Uaru	Cichlidae	benthopelagic	30.5	2.8
Rhinosardinia amazonica	Amazon spinejaw sprat	Clupeidae	pelagic	9.8	3.4
Ammocryptocharax elegans		Crenuchidae	benthopelagic	4	3
Ammocryptocharax minutus		Crenuchidae	benthopelagic	2.4	3
Characidium boavistae		Crenuchidae	benthopelagic	6.4	3.1
Characidium crandellii		Crenuchidae	benthopelagic	7.8	3.1
Characidium declivirostre		Crenuchidae	benthopelagic	9.7	3.1
Characidium etheostoma		Crenuchidae	benthopelagic	5.1	3.1
Characidium hasemani		Crenuchidae	benthopelagic	8.3	3.1
Characidium mirim		Crenuchidae	pelagic	2.5
Characidium papachibe		Crenuchidae	benthopelagic	3.3
Characidium purpuratum		Crenuchidae	benthopelagic	6.5	3.1
Characidium roesseli		Crenuchidae	benthopelagic	3.7	3
Characidium steindachneri		Crenuchidae	benthopelagic	5	3.1
Crenuchus spilurus	Sailfin tetra	Crenuchidae	pelagic	5.7	3.3
Elachocharax junki		Crenuchidae	pelagic	2.8	3
Elachocharax mitopterus		Crenuchidae	pelagic	1.7	3
Elachocharax pulcher		Crenuchidae	pelagic	2.7	3
Geryichthys sterbai		Crenuchidae	benthopelagic	3.7	3
Klausewitzia ritae		Crenuchidae	pelagic	3	3
Leptocharacidium omospilus		Crenuchidae	pelagic	8.5	3.1
Melanocharacidium depressum		Crenuchidae	benthopelagic	3.4	3
Melanocharacidium dispilomma		Crenuchidae	benthopelagic	5	3.1
Melanocharacidium melanopteron		Crenuchidae	benthopelagic	8.8	3.1
Melanocharacidium nigrum		Crenuchidae	benthopelagic	8.2	3.1
Melanocharacidium pectorale		Crenuchidae	benthopelagic	4.4	3.1
Melanocharacidium rex		Crenuchidae	benthopelagic	12	3.1
Microcharacidium weitzmani		Crenuchidae	pelagic	1.5	3
Odontocharacidium aphanes	Green dwarf tetra	Crenuchidae	pelagic	2	3
Poecilocharax weitzmani	Black morpho tetra	Crenuchidae	benthopelagic	4	3.1
Boulengerella cuvieri		Ctenoluciidae	pelagic	97.7	4.5
Boulengerella lateristriga	Striped pike-characin	Ctenoluciidae	pelagic	31.5	4.2
Boulengerella lucius	Golden pike-characin	Ctenoluciidae	pelagic	51.2	4.5
Boulengerella maculata	Spotted pike-characin	Ctenoluciidae	pelagic	38.9	4.2
Boulengerella xyrekes		Ctenoluciidae	pelagic	46.6	4.5
Curimata aspera		Curimatidae	benthopelagic	25.9	2
Curimata cisandina		Curimatidae	benthopelagic	14.9	2.2
Curimata cyprinoides		Curimatidae	benthopelagic	26	2.4
Curimata inornata		Curimatidae	benthopelagic	16.6	2
Curimata knerii		Curimatidae	benthopelagic	21.6	2
Curimata ocellata		Curimatidae	benthopelagic	27.5	2
Curimata roseni		Curimatidae	benthopelagic	17.6	2.1
Curimata vittata		Curimatidae	benthopelagic	22.8	2
Curimatella alburna		Curimatidae	benthopelagic	22.6	2
Curimatella dorsalis		Curimatidae	benthopelagic	13.9	2.2
Curimatella immaculata		Curimatidae	benthopelagic	11.4	2.3
Curimatella meyeri		Curimatidae	benthopelagic	19	2
Curimatopsis crypticus		Curimatidae	benthopelagic	6.1	2.5
Curimatopsis evelynae	Spottail curimata	Curimatidae	benthopelagic	4.9	2.6
Curimatopsis macrolepis	Shinyscaled curimata	Curimatidae	benthopelagic	7.3	2.4
Curimatopsis microlepis		Curimatidae	benthopelagic	10.9	2.3
Cyphocharax abramoides		Curimatidae	benthopelagic	26	2
Cyphocharax festivus		Curimatidae	benthopelagic	7.7	2.3
Cyphocharax leucostictus		Curimatidae	benthopelagic	12.8	2
Cyphocharax mestomyllon		Curimatidae	benthopelagic	5.1	2.5
Cyphocharax multilineatus		Curimatidae	benthopelagic	13.3	2
Cyphocharax nigripinnis		Curimatidae	benthopelagic	7.9	2.3
Cyphocharax notatus		Curimatidae	benthopelagic	15	2
Cyphocharax pantostictos		Curimatidae	benthopelagic	12	2
Cyphocharax plumbeus		Curimatidae	benthopelagic	21.7	2
Cyphocharax saladensis	Rosy curimata	Curimatidae	benthopelagic	8.2	2
Cyphocharax spiluropsis		Curimatidae	benthopelagic	11	2.1
Cyphocharax spilurus		Curimatidae	benthopelagic	12.7	2
Cyphocharax stilbolepis		Curimatidae	benthopelagic	13.2	2
Cyphocharax vexillapinnus		Curimatidae	benthopelagic	7.7	2.3
Potamorhina altamazonica		Curimatidae	benthopelagic	32.9	2
Potamorhina latior		Curimatidae	benthopelagic	25	2
Potamorhina pristigaster		Curimatidae	benthopelagic	26.7	2
Psectrogaster amazonica		Curimatidae	benthopelagic	20.4	2
Psectrogaster ciliata		Curimatidae	benthopelagic	15.7	2
Psectrogaster essequibensis		Curimatidae	benthopelagic	20.6	2
Psectrogaster falcata		Curimatidae	benthopelagic	20.5	2
Psectrogaster rhomboides		Curimatidae	benthopelagic	21.7	2
Psectrogaster rutiloides		Curimatidae	benthopelagic	17.5	2
Steindachnerina bimaculata		Curimatidae	benthopelagic	16.2	2
Steindachnerina binotata		Curimatidae	benthopelagic	16.2	2
Steindachnerina dobula		Curimatidae	benthopelagic	19.9	2
Steindachnerina guentheri		Curimatidae	benthopelagic	13.5	2
Steindachnerina hypostoma		Curimatidae	benthopelagic	12	2
Steindachnerina leucisca		Curimatidae	benthopelagic	18.4	2
Steindachnerina planiventris		Curimatidae	benthopelagic	10.6	2.1
Steindachnerina quasimodoi		Curimatidae	benthopelagic	15	2
Steindachnerina seriata		Curimatidae	pelagic	10.1
Cynodon gibbus		Cynodontidae	pelagic	34.2	4.5
Cynodon septenarius		Cynodontidae	pelagic	38.1	4.2
Hydrolycus armatus		Cynodontidae	pelagic	80.5	4.5
Hydrolycus scomberoides	Payara	Cynodontidae	benthopelagic	117	4.5
Hydrolycus tatauaia		Cynodontidae	pelagic	55.5	4.4
Rhaphiodon vulpinus	Biara	Cynodontidae	pelagic	97.6	4.5
Orestias agassizii		Cyprinodontidae	benthopelagic	7	2.9
Orestias empyraeus		Cyprinodontidae	benthopelagic	10	2.9
Orestias gymnotus		Cyprinodontidae	benthopelagic	8	2.9
Orestias jussiei		Cyprinodontidae	benthopelagic	8.5	2.9
Orestias pentlandii		Cyprinodontidae	benthopelagic	23.5	2.8
Orestias ututo		Cyprinodontidae	benthopelagic	5.5	2.9
Acanthodoras cataphractus	Spiny catfish	Doradidae	demersal	14	2
Acanthodoras depressus		Doradidae	demersal	9.9	2.8
Acanthodoras spinosissimus	Talking catfish	Doradidae	demersal	16.7	2.8
Agamyxis albomaculatus	Spiny cat-fish	Doradidae	demersal	18.3	2.8
Agamyxis pectinifrons	Whitebarred catfish	Doradidae	demersal	18.3	2.8
Amblydoras monitor		Doradidae	demersal	11	2.8
Amblydoras nauticus		Doradidae	demersal	9.1	2.8
Anadoras grypus		Doradidae	demersal	13.9	2.8
Anadoras regani		Doradidae	demersal	13.4	2.8
Astrodoras asterifrons		Doradidae	demersal	9.8	2.8
Centrochir crocodili		Doradidae	demersal	25.6	2.8
Centrodoras brachiatus		Doradidae	demersal	41	2.7
Doras carinatus		Doradidae	demersal	36.6	2.7
Doras higuchii		Doradidae	demersal	39.7	2.8
Doras phlyzakion		Doradidae	demersal	39.7	2.8
Hassar orestis		Doradidae	demersal	30.1	2.8
Hemidoras morrisi		Doradidae	demersal	17.1	2.8
Hemidoras stenopeltis		Doradidae	demersal	15.3	2.8
Hypodoras forficulatus		Doradidae	demersal	12.7	2.8
Leptodoras acipenserinus		Doradidae	demersal	24.8	2.8
Leptodoras juruensis		Doradidae	demersal	35.1	2.7
Leptodoras linnelli		Doradidae	demersal	28.1	2.8
Leptodoras myersi		Doradidae	demersal	9.4	2.8
Leptodoras praelongus		Doradidae	demersal	22.6	2.8
Lithodoras dorsalis	Rock-bacu	Doradidae	demersal	100	2
Megalodoras uranoscopus		Doradidae	demersal	73.2	2.7
Nemadoras elongatus		Doradidae	demersal	15.5	2.8
Nemadoras hemipeltis		Doradidae	demersal	17.6	2.8
Nemadoras humeralis		Doradidae	demersal	15.9	2.8
Nemadoras trimaculatus		Doradidae	demersal	13.2	2.8
Opsodoras boulengeri		Doradidae	demersal	17.3	2.8
Opsodoras morei		Doradidae	demersal	12.6	2.8
Opsodoras stuebelii		Doradidae	demersal	13.4	2.8
Opsodoras ternetzi		Doradidae	demersal	14.9	2.8
Ossancora asterophysa		Doradidae	demersal	13.1
Ossancora eigenmanni		Doradidae	demersal	12.5	2.8
Ossancora punctata		Doradidae	demersal	13.4	2.8
Oxydoras niger	Ripsaw catfish	Doradidae	demersal	122	2.8
Physopyxis ananas		Doradidae	demersal	2.7	3
Physopyxis cristata		Doradidae	demersal	2.8	3
Physopyxis lyra		Doradidae	demersal	4.3	2.9
Platydoras costatus	Raphael catfish	Doradidae	demersal	29.3	3
Pterodoras granulosus	Granulated catfish	Doradidae	demersal	70	2.5
Rhinodoras boehlkei		Doradidae	demersal	16.2	2.8
Scorpiodoras heckelii		Doradidae	demersal	19.6	2.8
Trachydoras microstomus		Doradidae	demersal	7.2	2.9
Trachydoras nattereri		Doradidae	demersal	12.6	2.8
Trachydoras steindachneri		Doradidae	demersal	10.5	2.8
Amazonsprattus scintilla	Rio Negro pygmy anchovy	Engraulidae	pelagic	2.4	3.2
Anchoviella alleni	Allen's anchovy	Engraulidae	pelagic	10.7	3.3
Anchoviella carrikeri	Carriker's anchovy	Engraulidae	pelagic	7.9	3.2
Anchoviella guianensis	Guyana anchovy	Engraulidae	pelagic	9	3.4
Anchoviella jamesi	James's anchovy	Engraulidae	pelagic	6.1	3.1
Anchoviella juruasanga		Engraulidae	pelagic	6.4
Anchoviella nattereri	Natterer's anchovy	Engraulidae	pelagic	6.1	3.2
Jurengraulis juruensis	Jurua anchovy	Engraulidae	pelagic	19.5	3.4
Lycengraulis grossidens	Atlantic sabretooth anchovy	Engraulidae	pelagic-neritic	28.7	3.6
Hoplerythrinus unitaeniatus	Aimara	Erythrinidae	pelagic	25	3.4
Hoplias aimara		Erythrinidae	benthopelagic	122	3.7
Hoplias curupira		Erythrinidae	benthopelagic	36.5
Hoplias macrophthalmus	Giant trahira	Erythrinidae	benthopelagic	100	4.2
Hoplias malabaricus	Trahira	Erythrinidae	benthopelagic	55.2	4.5
Carnegiella marthae	Blackwing hatchetfish	Gasteropelecidae	pelagic	3.4	3.2
Carnegiella myersi	Pygmy hatchetfish	Gasteropelecidae	pelagic	2.6	3.1
Carnegiella schereri	Dwarf hatchetfish	Gasteropelecidae	pelagic	3.2	3.2
Carnegiella strigata	Marbled hatchetfish	Gasteropelecidae	pelagic	4.3	3.3
Gasteropelecus levis	Silver hatchetfish	Gasteropelecidae	pelagic	4.3	3.3
Gasteropelecus sternicla	River hatchetfish	Gasteropelecidae	pelagic	4.6	3.3
Thoracocharax securis	Giant hatchetfish	Gasteropelecidae	pelagic	8.3	3.5
Thoracocharax stellatus	Spotfin hatchetfish	Gasteropelecidae	pelagic	8.2	3.5
Awaous flavus		Gobiidae	benthopelagic	10	2.5
Ctenogobius thoropsis	Sperm goby	Gobiidae	demersal	5.4	3.2
Electrophorus electricus	Electric eel	Gymnotidae	benthopelagic	305	3.9
Gymnotus anguillaris		Gymnotidae	benthopelagic	36.6	3.3
Gymnotus capanema		Gymnotidae	benthopelagic	17.9
Gymnotus cataniapo		Gymnotidae	benthopelagic	31.6	3.3
Gymnotus coatesi		Gymnotidae	benthopelagic	30	3.3
Gymnotus coropinae		Gymnotidae	benthopelagic	16.2	3.2
Gymnotus curupira		Gymnotidae	benthopelagic	23.5	3.3
Gymnotus javari		Gymnotidae	benthopelagic	20.1	3.2
Gymnotus jonasi		Gymnotidae	benthopelagic	13.5	2.5
Gymnotus mamiraua		Gymnotidae	demersal	24.3	3.3
Gymnotus melanopleura		Gymnotidae	demersal	10	3.2
Gymnotus obscurus		Gymnotidae	benthopelagic	21.5	3.2
Gymnotus onca		Gymnotidae	demersal	12	3.2
Gymnotus pedanopterus		Gymnotidae	benthopelagic	28.1	3.3
Gymnotus stenoleucus		Gymnotidae	benthopelagic	14.2	3.2
Gymnotus tigre		Gymnotidae	benthopelagic	41.1	3.3
Gymnotus varzea		Gymnotidae	benthopelagic	28.5	3.2
Anodus elongatus		Hemiodontidae	pelagic	37	3.4
Anodus orinocensis		Hemiodontidae	pelagic	33.5	2.8
Argonectes longiceps		Hemiodontidae	benthopelagic	29.9	2.8
Bivibranchia fowleri		Hemiodontidae	benthopelagic	17.6	2.9
Bivibranchia velox		Hemiodontidae	benthopelagic	18.5	2.9
Hemiodus amazonum		Hemiodontidae	benthopelagic	19.8	2.7
Hemiodus argenteus		Hemiodontidae	benthopelagic	28.9	2.7
Hemiodus atranalis		Hemiodontidae	benthopelagic	11.2	2.8
Hemiodus gracilis		Hemiodontidae	benthopelagic	19.9	2.7
Hemiodus immaculatus		Hemiodontidae	benthopelagic	30.1	2.9
Hemiodus jatuarana		Hemiodontidae	benthopelagic	18.7	2.7
Hemiodus microlepis		Hemiodontidae	benthopelagic	29.2	2.8
Hemiodus quadrimaculatus	Barred hemiodus	Hemiodontidae	benthopelagic	16	2.6
Hemiodus semitaeniatus	Halfline hemiodus	Hemiodontidae	benthopelagic	24.4	2.7
Hemiodus sterni		Hemiodontidae	benthopelagic	9.6	2.8
Hemiodus thayeria		Hemiodontidae	benthopelagic	10.9	2.8
Hemiodus unimaculatus		Hemiodontidae	benthopelagic	26.2	2
Hemiodus vorderwinkleri		Hemiodontidae	benthopelagic	8.7	2.8
Micromischodus sugillatus		Hemiodontidae	benthopelagic	20.7	2.9
Hyporhamphus brederi		Hemiramphidae	pelagic	12.2	3
Brachyrhamdia meesi		Heptapteridae	demersal	7.4	3.2
Cetopsorhamdia phantasia		Heptapteridae	demersal	4.9	3.1
Chasmocranus peruanus		Heptapteridae	demersal	6.3	3.2
Chasmocranus quadrizonatus		Heptapteridae	demersal	6	3.2
Goeldiella eques		Heptapteridae	demersal	35.3	3.4
Horiomyzon retropinnatus		Heptapteridae	demersal	2.9	3.1
Imparfinis nemacheir		Heptapteridae	demersal	12.1	3
Mastiglanis asopos		Heptapteridae	demersal	8.1	3.2
Myoglanis koepckei		Heptapteridae	demersal	7.2	3.2
Nemuroglanis lanceolatus		Heptapteridae	demersal	4.7	3.1
Nemuroglanis pauciradiatus		Heptapteridae	demersal	4	3.1
Pariolius armillatus		Heptapteridae	demersal	3.9	3.2
Phreatobius cisternarum		Heptapteridae	demersal	6.7	3.2
Phreatobius dracunculus		Heptapteridae	demersal	4.7	3.1
Pimelodella cristata		Heptapteridae	demersal	41.5	3.6
Pimelodella gracilis	Graceful pimelodella	Heptapteridae	demersal	22	3.2
Pimelodella nigrofasciata		Heptapteridae	demersal	13.1	3.6
Pimelodella ophthalmica		Heptapteridae	demersal	14.5	3.6
Pimelodella peruensis		Heptapteridae	demersal	5.2	3.3
Pimelodella steindachneri		Heptapteridae	demersal	25.9	3.8
Rhamdella rusbyi		Heptapteridae	demersal	16	3.3
Rhamdia laukidi		Heptapteridae	benthopelagic	40.3	3.5
Rhamdia muelleri		Heptapteridae	benthopelagic	25.4	3.4
Rhamdia quelen	South American catfish	Heptapteridae	benthopelagic	47.4	3.2
Brachyhypopomus bennetti		Hypopomidae	benthopelagic
Brachyhypopomus brevirostris	Bluntnose knifefish	Hypopomidae	benthopelagic	34.7	3.2
Brachyhypopomus pinnicaudatus		Hypopomidae	benthopelagic	18.6	3.2
Hypopygus benoneae		Hypopomidae	benthopelagic	9.2
Hypopygus hoedemani	Hoedeman's Hypopygus	Hypopomidae	benthopelagic	5.9
Hypopygus isbruckeri	Isbrücker's Hypopygus	Hypopomidae	benthopelagic	9
Hypopygus lepturus		Hypopomidae	benthopelagic	10	3.1
Hypopygus nijsseni	Nijssen's Hypopygus	Hypopomidae	benthopelagic	9.6
Hypopygus ortegai	Ortega's Hypopygus	Hypopomidae	benthopelagic	11.4
Microsternarchus bilineatus		Hypopomidae	benthopelagic	12	3.1
Racenisia fimbriipinna		Hypopomidae	benthopelagic	11.7	3.1
Steatogenys duidae		Hypopomidae	benthopelagic	20.9	3.2
Steatogenys elegans	Barred knifefish	Hypopomidae	benthopelagic	29.4	3.2
Steatogenys ocellatus		Hypopomidae	benthopelagic	40.5	3.2
Stegostenopos cryptogenes		Hypopomidae	benthopelagic	9.8	3.1
Bryconops affinis	Orangefin tetra	Iguanodectidae	benthopelagic	12	2.7
Bryconops alburnoides		Iguanodectidae	benthopelagic	12.2	3.2
Bryconops caudomaculatus	Tailspot tetra	Iguanodectidae	benthopelagic	7	4.2
Bryconops melanurus		Iguanodectidae	benthopelagic	14.6	3.2
Iguanodectes purusii		Iguanodectidae	benthopelagic	9.1	3
Iguanodectes rachovii		Iguanodectidae	benthopelagic	7.6	3
Iguanodectes spilurus		Iguanodectidae	benthopelagic	12.4	3
Piabucus dentatus		Iguanodectidae	benthopelagic	15.7	3.5
Copeina guttata	Redspotted tetra	Lebiasinidae	pelagic	9.3	3.1
Copeina osgoodi		Lebiasinidae	pelagic	6.2	3.3
Copella arnoldi	Splash tetra	Lebiasinidae	benthopelagic	4.1	3.3
Copella metae		Lebiasinidae	benthopelagic	4.2	3.3
Copella nattereri	Spotted tetra	Lebiasinidae	benthopelagic	5.5	3.4
Copella nigrofasciata		Lebiasinidae	benthopelagic	5.5	3.4
Copella vilmae	Rainbow copella	Lebiasinidae	benthopelagic	5.5	3.4
Lebiasina yepezi		Lebiasinidae	benthopelagic	18.6
Nannostomus beckfordi	Golden pencilfish	Lebiasinidae	benthopelagic	7.9	3.3
Nannostomus digrammus	Twostripe pencilfish	Lebiasinidae	benthopelagic	3.4	3.2
Nannostomus eques	Brown pencilfish	Lebiasinidae	benthopelagic	5	3.3
Nannostomus harrisoni	Blackstripe pencilfish	Lebiasinidae	benthopelagic	5.5	3.3
Nannostomus limatus	Elegant pencilfish	Lebiasinidae	benthopelagic	4.4	3.2
Nannostomus marginatus		Lebiasinidae	benthopelagic	3.5	3.2
Nannostomus trifasciatus	Threestripe pencilfish	Lebiasinidae	benthopelagic	4	3.3
Nannostomus unifasciatus	Oneline pencilfish	Lebiasinidae	benthopelagic	4.6	3.3
Piabucina elongata		Lebiasinidae	demersal	17.5	3.6
Pyrrhulina australis		Lebiasinidae	benthopelagic	6.1	3.2
Pyrrhulina beni		Lebiasinidae	benthopelagic	6.1	3.2
Pyrrhulina brevis		Lebiasinidae	benthopelagic	8.5	3.3
Pyrrhulina eleanorae		Lebiasinidae	benthopelagic	9.1	3.3
Pyrrhulina filamentosa		Lebiasinidae	benthopelagic	10.4	3.4
Pyrrhulina laeta	Halfbanded pyrrhulina	Lebiasinidae	benthopelagic	9.3	3.3
Pyrrhulina marilynae		Lebiasinidae	pelagic	3.7
Pyrrhulina maxima		Lebiasinidae	benthopelagic	9.8	3.3
Pyrrhulina obermulleri		Lebiasinidae	benthopelagic	7.3	3.3
Pyrrhulina semifasciata		Lebiasinidae	benthopelagic	8.5	3.3
Pyrrhulina spilota		Lebiasinidae	benthopelagic	8.5	3.3
Pyrrhulina vittata	Banded pyrrhulina	Lebiasinidae	benthopelagic	4.3	3.2
Pyrrhulina zigzag		Lebiasinidae	benthopelagic	4.3	3.2
Lepidosiren paradoxa	South American lungfish	Lepidosirenidae	demersal	125	3.1
Acanthicus hystrix		Loricariidae	demersal	64.7	2
Acestridium triplax		Loricariidae	demersal	6.8	2
Ancistrus dolichopterus	Bushymouth catfish	Loricariidae	demersal	14.4	2
Ancistrus dubius		Loricariidae	demersal	15.4	2
Ancistrus fulvus		Loricariidae	demersal	10.7	2.1
Ancistrus hoplogenys		Loricariidae	demersal	19.3	2
Ancistrus latifrons		Loricariidae	demersal	18.8	2
Ancistrus maculatus		Loricariidae	demersal	14.4	2
Apistoloricaria condei		Loricariidae	demersal	17.2	2.4
Apistoloricaria ommation		Loricariidae	demersal	12	2.5
Aposturisoma myriodon		Loricariidae	demersal	24.4	2.3
Crossoloricaria rhami		Loricariidae	demersal	15.5	2.5
Dekeyseria amazonica		Loricariidae	demersal	21.7	2
Farlowella amazonum		Loricariidae	demersal	27.5	2.3
Farlowella gracilis		Loricariidae	demersal	21.7	2.4
Farlowella knerii		Loricariidae	demersal	19.8	2.4
Farlowella nattereri		Loricariidae	demersal	32.3	2.3
Farlowella oxyrryncha		Loricariidae	demersal	28.1	2.3
Farlowella platorynchus		Loricariidae	demersal	23.7	2.3
Farlowella schreitmuelleri		Loricariidae	demersal	22.1	2.4
Hemiancistrus pankimpuju		Loricariidae	demersal	15.9	2
Hemiodontichthys acipenserinus		Loricariidae	demersal	16.4	3.3
Hisonotus bockmanni		Loricariidae	demersal	2.9
Hypancistrus inspector		Loricariidae	benthopelagic	15.4	2
Hypoptopoma bianale		Loricariidae	benthopelagic	5.4
Hypoptopoma brevirostratum		Loricariidae	benthopelagic	5.1
Hypoptopoma gulare		Loricariidae	demersal	12.8	2
Hypoptopoma psilogaster		Loricariidae	demersal	8.5	2
Hypoptopoma spectabile		Loricariidae	demersal	3.5	2.4
Hypoptopoma steindachneri		Loricariidae	demersal	12.2	2
Hypoptopoma sternoptychum		Loricariidae	demersal	4	2.3
Hypoptopoma thoracatum		Loricariidae	demersal	8	2
Hypostomus carinatus		Loricariidae	demersal	30.3	2
Hypostomus ericius		Loricariidae	demersal	22.8	2.2
Hypostomus hemicochliodon		Loricariidae	demersal	28	2.1
Hypostomus soniae		Loricariidae	demersal	17.8	2.2
Lamontichthys filamentosus		Loricariidae	demersal	20.4	2.4
Lasiancistrus heteracanthus		Loricariidae	demersal	18.7	2
Lasiancistrus schomburgkii		Loricariidae	demersal	17.6	2.4
Leporacanthicus galaxias		Loricariidae	demersal	25.7	2
Limatulichthys griseus		Loricariidae	demersal	22	2.4
Lithoxus bovallii		Loricariidae	demersal	7.2	2.4
Loricaria cataphracta		Loricariidae	demersal	36	2.2
Loricaria clavipinna		Loricariidae	demersal	22	2.4
Loricaria parnahybae		Loricariidae	demersal	19.5	2.4
Loricaria pumila		Loricariidae	demersal	9.9	2.6
Loricaria simillima		Loricariidae	demersal	22	2.4
Loricariichthys cashibo		Loricariidae	demersal	26	2.6
Loricariichthys nudirostris		Loricariidae	demersal	26	2.6
Loricariichthys stuebelii		Loricariidae	demersal	23.2	2.6
Loricariichthys ucayalensis		Loricariidae	demersal	22	2.6
Micracanthicus vandragti		Loricariidae	demersal	5.2
Neoplecostomus bandeirante		Loricariidae	demersal	13.4
Neoplecostomus botucatu		Loricariidae	demersal	12
Neoplecostomus langeanii		Loricariidae	demersal	10.4
Oligancistrus punctatissimus		Loricariidae	demersal	12.9	2.1
Otocinclus batmani		Loricariidae	demersal	4.5	2.1
Otocinclus hoppei		Loricariidae	demersal	4	2.3
Otocinclus huaorani		Loricariidae	demersal	3.9	2.3
Otocinclus macrospilus		Loricariidae	demersal	4.3	2.2
Otocinclus mariae		Loricariidae	demersal	4	2.3
Otocinclus mura		Loricariidae	demersal	4.4	2.2
Otocinclus vestitus		Loricariidae	demersal	3.9	2.3
Otocinclus vittatus		Loricariidae	demersal	3.3	2.5
Oxyropsis carinata		Loricariidae	demersal	9.3	2
Oxyropsis wrightiana		Loricariidae	demersal	6.8	2
Panaqolus albivermis		Loricariidae	demersal
Panaqolus gnomus	Dwarf panaque	Loricariidae	benthopelagic	8.7	2.3
Panaqolus nocturnus	Dusky panaque	Loricariidae	benthopelagic	17	2
Panaque bathyphilus		Loricariidae	demersal	9	2
Panaque nigrolineatus	Royal panaque	Loricariidae	benthopelagic	52.5	2
Panaque schaeferi		Loricariidae	demersal	31.4
Parancistrus aurantiacus		Loricariidae	demersal	23.5	2
Pareiorhaphis regani		Loricariidae	demersal	14.8	2.3
Parotocinclus amazonensis		Loricariidae	demersal	2.5	2.8
Parotocinclus longirostris		Loricariidae	demersal	3.2	2.5
Peckoltia bachi		Loricariidae	demersal	14	2.2
Peckoltia oligospila		Loricariidae	demersal	12.8	2.1
Peckoltia vermiculata		Loricariidae	demersal	15.9	2
Peckoltia vittata		Loricariidae	demersal	14	2
Planiloricaria cryptodon		Loricariidae	demersal	26.2	2.3
Pseudacanthicus histrix		Loricariidae	demersal	90	2
Pseudacanthicus spinosus		Loricariidae	demersal	31.7	2
Pseudohemiodon amazonum		Loricariidae	demersal	11.2	2.5
Pseudohemiodon apithanos		Loricariidae	demersal	17.7	2.4
Pseudohemiodon lamina		Loricariidae	demersal	19.4	2.4
Pseudoloricaria laeviuscula		Loricariidae	demersal	37.2	2.2
Pseudorinelepis genibarbis		Loricariidae	benthopelagic	43.4	2
Pterosturisoma microps		Loricariidae	demersal	19.6	2.4
Pterygoplichthys disjunctivus	Vermiculated sailfin catfish	Loricariidae	demersal	70	2
Pterygoplichthys gibbiceps	Leopard pleco	Loricariidae	demersal	50	2
Pterygoplichthys lituratus		Loricariidae	demersal	45.1	2
Pterygoplichthys multiradiatus	Orinoco sailfin catfish	Loricariidae	demersal	50	2.2
Pterygoplichthys pardalis	Amazon sailfin catfish	Loricariidae	demersal	51.6	2
Pterygoplichthys punctatus	Corroncho	Loricariidae	demersal	34.8	2
Pterygoplichthys scrophus		Loricariidae	demersal	33.5	2.1
Pterygoplichthys weberi		Loricariidae	demersal	24	2.2
Pterygoplichthys xinguensis		Loricariidae	demersal	32.9	2.1
Rhadinoloricaria macromystax		Loricariidae	demersal	17.3	2.4
Rineloricaria fallax		Loricariidae	demersal	19.1	2.4
Rineloricaria formosa		Loricariidae	demersal	18.5	2.4
Rineloricaria hasemani		Loricariidae	demersal	16.7	2.4
Rineloricaria heteroptera		Loricariidae	demersal	16.2	2.5
Rineloricaria konopickyi		Loricariidae	demersal	11.7	2.5
Rineloricaria lanceolata	Chocolate-colored catfish	Loricariidae	demersal	16.4	2.4
Rineloricaria melini		Loricariidae	demersal	15.9	2.5
Rineloricaria phoxocephala		Loricariidae	demersal	18.3	2.4
Rineloricaria teffeana		Loricariidae	demersal	17.1	2.4
Soromonichthys stearleyi		Loricariidae	demersal	3.6
Squaliforma scopularia		Loricariidae	demersal	60.4	2
Squaliforma virescens		Loricariidae	demersal	8.9	2.5
Sturisoma guentheri		Loricariidae	demersal	28.1	2.3
Stictorhinus potamius		Ophichthidae	demersal	34.5	3.7
Osteoglossum bicirrhosum	Arawana	Osteoglossidae	benthopelagic	90	3.4
Osteoglossum ferreirai	Black arawana	Osteoglossidae	benthopelagic	90	2
Parodon buckleyi		Parodontidae	benthopelagic	18.3	2.2
Parodon pongoensis	Pongo characin	Parodontidae	benthopelagic	12.7	2.4
Aguarunichthys inpai		Pimelodidae	benthopelagic	51.2	4.1
Aguarunichthys torosus		Pimelodidae	benthopelagic	42.2	4
Brachyplatystoma capapretum		Pimelodidae	benthopelagic	70.9	4.3
Brachyplatystoma juruense	Zebra catfish	Pimelodidae	demersal	60	4.5
Brachyplatystoma platynemum	Slobbering catfish	Pimelodidae	demersal	122	4.5
Brachyplatystoma rousseauxii		Pimelodidae	demersal	192	4.6
Brachyplatystoma tigrinum	Tigerstriped catfish	Pimelodidae	demersal	60	4.2
Brachyplatystoma vaillantii	Laulao catfish	Pimelodidae	demersal	150	4.5
Calophysus macropterus	Zamurito	Pimelodidae	demersal	40	3.2
Cheirocerus eques		Pimelodidae	demersal	21.5	3.8
Cheirocerus goeldii		Pimelodidae	demersal	18.5	3.7
Duopalatinus peruanus		Pimelodidae	demersal	18.3	3.7
Exallodontus aguanai		Pimelodidae	demersal	24.4	3.8
Hemisorubim platyrhynchos	Porthole shovelnose catfish	Pimelodidae	demersal	64.1	4.5
Hypophthalmus edentatus	Highwaterman catfish	Pimelodidae	pelagic	57.5	2.9
Hypophthalmus marginatus		Pimelodidae	demersal	55	3.4
Leiarius longibarbis		Pimelodidae	demersal	80	4.2
Leiarius marmoratus		Pimelodidae	demersal	100	4.5
Megalonema amaxanthum		Pimelodidae	demersal	12.9	3.6
Megalonema platycephalum		Pimelodidae	demersal	30	4
Phractocephalus hemioliopterus	Redtail catfish	Pimelodidae	demersal	134	4.2
Pimelodina flavipinnis		Pimelodidae	demersal	54.4	3.2
Pimelodus albofasciatus		Pimelodidae	benthopelagic	25	3.3
Pimelodus altissimus		Pimelodidae	benthopelagic	26.7	3.3
Pimelodus blochii	Bloch's catfish	Pimelodidae	benthopelagic	35	3.1
Pimelodus jivaro		Pimelodidae	benthopelagic	26.7	3.3
Pimelodus microstoma		Pimelodidae	benthopelagic	22	3.2
Pimelodus ornatus		Pimelodidae	benthopelagic	47	3.3
Pimelodus pictus	Pictus cat	Pimelodidae	benthopelagic	11	3.2
Pinirampus pirinampu	Flatwhiskered catfish	Pimelodidae	demersal	120	4.5
Platynematichthys notatus	Coroatá	Pimelodidae	demersal	97.6	4.3
Platysilurus mucosus		Pimelodidae	demersal	24.4	3.8
Platystomatichthys sturio		Pimelodidae	demersal	40	4
Propimelodus caesius		Pimelodidae	demersal	20.7	3.8
Propimelodus eigenmanni		Pimelodidae	benthopelagic	29.3	3.9
Pseudoplatystoma corruscans	Spotted sorubim	Pimelodidae	demersal	166	4.5
Pseudoplatystoma fasciatum	Barred sorubim	Pimelodidae	demersal	104	4.4
Pseudoplatystoma reticulatum		Pimelodidae	demersal	73.8
Pseudoplatystoma tigrinum	Tiger sorubim	Pimelodidae	demersal	130	4.5
Sorubim elongatus	Slender shovelnose catfish	Pimelodidae	demersal	36.6	4
Sorubim lima	Duckbill catfish	Pimelodidae	demersal	54.2	4.1
Sorubim maniradii		Pimelodidae	demersal	30.7	3.9
Sorubimichthys planiceps	Firewood catfish	Pimelodidae	demersal	183	4.5
Zungaro zungaro	Gilded catfish	Pimelodidae	demersal	170.8	4.5
Fluviphylax pygmaeus		Poeciliidae	benthopelagic	2.4	3
Fluviphylax simplex		Poeciliidae	benthopelagic	2	3
Micropoecilia bifurca		Poeciliidae	benthopelagic	3	3
Micropoecilia branneri		Poeciliidae	benthopelagic	4	3
Micropoecilia picta	Swamp guppies	Poeciliidae	benthopelagic	5	3
Pamphorichthys minor	Mini-molly	Poeciliidae	benthopelagic	2.1	3
Pamphorichthys scalpridens		Poeciliidae	pelagic	4	3
Poecilia parae		Poeciliidae	benthopelagic	7.5	3
Poecilia waiapi		Poeciliidae	pelagic	7.5
Monocirrhus polyacanthus	Amazon leaffish	Polycentridae	benthopelagic	9.8	4.2
Polycentrus schomburgkii	Guyana leaffish	Polycentridae	benthopelagic	6.7	3.5
Ilisha amazonica	Amazon ilisha	Pristigasteridae	pelagic	21.1	3.4
Pellona altamazonica		Pristigasteridae	pelagic	3.6	3.3
Pellona castelnaeana	Amazon pellona	Pristigasteridae	pelagic	88.8	3.7
Pellona flavipinnis	Yellowfin river pellona	Pristigasteridae	pelagic	73	4.5
Pristigaster cayana	Amazon hatchet herring	Pristigasteridae	pelagic	17.7	3.4
Pristigaster whiteheadi		Pristigasteridae	pelagic	17.7	3.4
Prochilodus britskii		Prochilodontidae	benthopelagic	29	2.1
Prochilodus nigricans	Black prochilodus	Prochilodontidae	benthopelagic	37	2.4
Prochilodus rubrotaeniatus		Prochilodontidae	benthopelagic	39	2
Semaprochilodus brama		Prochilodontidae	benthopelagic	34.2	2
Semaprochilodus insignis	Kissing prochilodus	Prochilodontidae	benthopelagic	27	2
Semaprochilodus taeniurus	Silver prochilodus	Prochilodontidae	benthopelagic	29.3	2
Batrochoglanis raninus		Pseudopimelodidae	demersal	24.4	3.7
Batrochoglanis villosus		Pseudopimelodidae	demersal	14.8	3.5
Microglanis lundbergi		Pseudopimelodidae	demersal
Microglanis zonatus		Pseudopimelodidae	demersal	2.4	3.1
Pseudopimelodus pulcher		Pseudopimelodidae	demersal	8.7	3.4
Gymnorhamphichthys rondoni		Rhamphichthyidae	benthopelagic	15	3.1
Rhamphichthys drepanium		Rhamphichthyidae	benthopelagic	54.9	3.2
Rhamphichthys longior		Rhamphichthyidae	benthopelagic	97.6	3.2
Rhamphichthys marmoratus		Rhamphichthyidae	benthopelagic	65	3.2
Anablepsoides amanan		Rivulidae	benthopelagic	3.4	3.1
Anablepsoides atratus		Rivulidae	benthopelagic	4	3.1
Anablepsoides christinae		Rivulidae	benthopelagic	6.5	3.2
Anablepsoides derhami		Rivulidae	benthopelagic	5	3.2
Anablepsoides elongatus		Rivulidae	benthopelagic	5	3.2
Anablepsoides erberi		Rivulidae	benthopelagic	6	3.2
Anablepsoides gamae		Rivulidae	benthopelagic	2.2
Anablepsoides holmiae		Rivulidae	benthopelagic	8	3.3
Anablepsoides immaculatus		Rivulidae	benthopelagic	9.5	3.3
Anablepsoides intermittens		Rivulidae	benthopelagic	7.5	3.3
Anablepsoides iridescens		Rivulidae	benthopelagic	7.5	3.3
Anablepsoides jari		Rivulidae	benthopelagic	2.5
Anablepsoides jucundus		Rivulidae	benthopelagic	5	3.2
Anablepsoides limoncochae		Rivulidae	benthopelagic	7.5	3.3
Anablepsoides micropus		Rivulidae	benthopelagic	7	3.3
Anablepsoides monticola		Rivulidae	benthopelagic	4	3.1
Anablepsoides ophiomimus		Rivulidae	benthopelagic	8.5	3.3
Anablepsoides ornatus		Rivulidae	benthopelagic	4	3.1
Anablepsoides ottonii		Rivulidae	benthopelagic	2.3
Anablepsoides peruanus		Rivulidae	benthopelagic	5.5	3.2
Anablepsoides roraima		Rivulidae	benthopelagic	2.9
Anablepsoides rubrolineatus		Rivulidae	benthopelagic	6.5	3.2
Anablepsoides speciosus		Rivulidae	benthopelagic	3.5	3.1
Anablepsoides taeniatus		Rivulidae	benthopelagic	6	3.2
Anablepsoides urophthalmus		Rivulidae	benthopelagic	7	3.3
Anablepsoides waimacui		Rivulidae	benthopelagic	8.5	3.3
Anablepsoides xanthonotus		Rivulidae	benthopelagic	7.5	3.3
Anablepsoides xinguensis		Rivulidae	benthopelagic	6.4
Aphyolebias obliquus		Rivulidae	benthopelagic	5.9	3.2
Aphyolebias peruensis	Peruvian longfin	Rivulidae	benthopelagic	10	3.3
Aphyolebias rubrocaudatus		Rivulidae	benthopelagic	6	3.2
Aphyolebias wischmanni		Rivulidae	benthopelagic	13	3.3
Laimosemion amanapira		Rivulidae	benthopelagic	4.9	3.2
Laimosemion breviceps		Rivulidae	benthopelagic	3.5	3.1
Laimosemion dibaphus		Rivulidae	benthopelagic	4	3.1
Laimosemion geayi		Rivulidae	benthopelagic	5	3.2
Laimosemion kirovskyi		Rivulidae	benthopelagic	2.8	3.1
Laimosemion lyricauda		Rivulidae	benthopelagic	5.5	3.2
Laimosemion rectocaudatus		Rivulidae	benthopelagic	6	3.2
Laimosemion strigatus		Rivulidae	benthopelagic	6	3.2
Laimosemion uakti		Rivulidae	benthopelagic	4.9	3.2
Laimosemion uatuman		Rivulidae	benthopelagic	4.9	3.2
Melanorivulus megaroni		Rivulidae	benthopelagic	3.9
Melanorivulus schuncki		Rivulidae	pelagic	3
Moema apurinan		Rivulidae	benthopelagic	11.4	3.3
Moema hellneri		Rivulidae	benthopelagic	11.4	3.3
Moema pepotei		Rivulidae	benthopelagic	12	3.3
Moema piriana		Rivulidae	benthopelagic	12	3.3
Moema portugali		Rivulidae	benthopelagic	12	3.3
Moema staecki		Rivulidae	benthopelagic	12	3.3
Plesiolebias altamira		Rivulidae	benthopelagic	2.2	3
Pterolebias longipinnis	Longfin killie	Rivulidae	benthopelagic	12	3.3
Simpsonichthys margaritatus		Rivulidae	pelagic	4.9
Pachypops fourcroi	Guyanan croaker	Sciaenidae	benthopelagic	25	4.2
Pachypops pigmaeus		Sciaenidae	pelagic	6.8	3.2
Pachypops trifilis		Sciaenidae	pelagic	23.1	3.5
Pachyurus gabrielensis		Sciaenidae	pelagic	17.8	3.4
Pachyurus junki		Sciaenidae	pelagic	35.8	3.6
Pachyurus schomburgkii	Amazon croaker	Sciaenidae	benthopelagic	25.5	3.5
Pachyurus stewarti		Sciaenidae	pelagic	23.4	3.5
Petilipinnis grunniens		Sciaenidae	pelagic	34	3.5
Plagioscion auratus	Black curbinata	Sciaenidae	benthopelagic	42.2	3.5
Plagioscion montei		Sciaenidae	pelagic	34.7	3.6
Plagioscion squamosissimus	South American silver croaker	Sciaenidae	benthopelagic	80	4.3
Plagioscion surinamensis	Pacora	Sciaenidae	benthopelagic	70	4.5
Scoloplax baskini		Scoloplacidae	benthopelagic	2	3
Scoloplax dicra		Scoloplacidae	demersal	1.7	3
Scoloplax empousa	Pantanal dwarf catfish	Scoloplacidae	demersal	2.4	2.8
Acnodon normani	Sheep-pacu	Serrasalmidae	benthopelagic	16.5	2.3
Catoprion mento	Wimple piranha	Serrasalmidae	pelagic	18.3	3.2
Metynnis argenteus		Serrasalmidae	pelagic	17	2.9
Metynnis fasciatus		Serrasalmidae	pelagic	7.1	2.9
Metynnis hypsauchen	Silver dollar	Serrasalmidae	pelagic	15	2.9
Metynnis lippincottianus		Serrasalmidae	pelagic	13	2.9
Metynnis luna		Serrasalmidae	pelagic	10.2	2.9
Metynnis maculatus	Spotted metynnis	Serrasalmidae	pelagic	18	2.9
Mylesinus paraschomburgkii		Serrasalmidae	benthopelagic	42.7	2.8
Myleus arnoldi		Serrasalmidae	benthopelagic	19.1	2.2
Myleus asterias		Serrasalmidae	benthopelagic	25	2
Myleus levis		Serrasalmidae	benthopelagic	24.4	2
Myleus lobatus		Serrasalmidae	benthopelagic	29.9	2
Myleus pacu		Serrasalmidae	benthopelagic	20	2
Myleus rhomboidalis		Serrasalmidae	benthopelagic	45.1	2.7
Myleus schomburgkii	Disk tetra	Serrasalmidae	benthopelagic	51.2	2
Myleus setiger		Serrasalmidae	benthopelagic	32.9	2
Myleus torquatus		Serrasalmidae	benthopelagic	28.7	2
Myloplus rubripinnis	Redhook myleus	Serrasalmidae	benthopelagic	39	2
Mylossoma aureum		Serrasalmidae	benthopelagic	20	2.5
Mylossoma duriventre		Serrasalmidae	benthopelagic	30.5	2.8
Ossubtus xinguense		Serrasalmidae	benthopelagic	21.5	2
Piaractus brachypomus	Pirapatinga	Serrasalmidae	pelagic	88	2.5
Pristobrycon aureus		Serrasalmidae	benthopelagic	18.4	3
Pristobrycon calmoni		Serrasalmidae	benthopelagic	15	4
Pristobrycon striolatus		Serrasalmidae	benthopelagic	15	2
Pygocentrus nattereri	Red piranha	Serrasalmidae	pelagic	61	3.7
Pygopristis denticulata	Lobetoothed piranha	Serrasalmidae	benthopelagic	20	2.9
Serrasalmus altispinis		Serrasalmidae	pelagic	23.2	3.5
Serrasalmus compressus		Serrasalmidae	benthopelagic	23.2	3.5
Serrasalmus eigenmanni		Serrasalmidae	benthopelagic	22	3.5
Serrasalmus elongatus	Slender piranha	Serrasalmidae	benthopelagic	30	3.4
Serrasalmus geryi		Serrasalmidae	benthopelagic	22.1	3.5
Serrasalmus gouldingi		Serrasalmidae	benthopelagic	34.1	3.6
Serrasalmus hollandi		Serrasalmidae	benthopelagic	22.6	3.5
Serrasalmus humeralis	Pirambeba	Serrasalmidae	benthopelagic	24.4	4
Serrasalmus maculatus		Serrasalmidae	pelagic	26	4.1
Serrasalmus manueli		Serrasalmidae	benthopelagic	43.9	3.7
Serrasalmus nigricans		Serrasalmidae	benthopelagic	25.1	3.6
Serrasalmus rhombeus	Redeye piranha	Serrasalmidae	benthopelagic	50.6	4.2
Serrasalmus sanchezi		Serrasalmidae	benthopelagic	13.9	3.4
Serrasalmus serrulatus		Serrasalmidae	benthopelagic	23.2	3.5
Serrasalmus spilopleura	Speckled piranha	Serrasalmidae	benthopelagic	25.6	3.2
Utiaritichthys sennaebragai		Serrasalmidae	benthopelagic	25	2.9
Archolaemus blax		Sternopygidae	benthopelagic	43.5	3.1
Archolaemus ferreirai		Sternopygidae	benthopelagic	34.2
Archolaemus janeae		Sternopygidae	benthopelagic	40.2
Archolaemus luciae		Sternopygidae	benthopelagic	49.7
Archolaemus santosi		Sternopygidae	benthopelagic	21.2
Distocyclus conirostris		Sternopygidae	benthopelagic	50	3.1
Eigenmannia limbata		Sternopygidae	benthopelagic	48.5	3
Eigenmannia macrops		Sternopygidae	benthopelagic	25.2	3
Eigenmannia nigra		Sternopygidae	benthopelagic	47.6	3
Eigenmannia virescens	Glass knifefish	Sternopygidae	benthopelagic	35.8	3
Rhabdolichops caviceps		Sternopygidae	benthopelagic	31	3
Rhabdolichops eastwardi		Sternopygidae	benthopelagic	27.6	3.2
Rhabdolichops lundbergi		Sternopygidae	benthopelagic	24.1	3.3
Rhabdolichops navalha		Sternopygidae	benthopelagic	19.6	3.2
Rhabdolichops nigrimans		Sternopygidae	benthopelagic	43.1	3.2
Rhabdolichops troscheli		Sternopygidae	benthopelagic	49	3.2
Sternopygus astrabes		Sternopygidae	benthopelagic	23.3	3.1
Sternopygus branco		Sternopygidae	benthopelagic	49.2	2.6
Sternopygus macrurus	Longtail knifefish	Sternopygidae	benthopelagic	140.5	3.2
Sternopygus obtusirostris		Sternopygidae	benthopelagic	56	3.2
Synbranchus madeirae		Synbranchidae	demersal	100	3.3
Synbranchus marmoratus	Marbled swamp eel	Synbranchidae	demersal	150	2.8
Colomesus asellus	Amazon puffer	Tetraodontidae	demersal	15.6	3.3
Colomesus psittacus	Banded puffer	Tetraodontidae	demersal	35.3	3.6
Acanthopoma annectens		Trichomycteridae	demersal	14.6	3.3
Apomatoceros alleni		Trichomycteridae	demersal	17.8	3.3
Haemomaster venezuelae		Trichomycteridae	demersal	8.1	3.2
Henonemus macrops		Trichomycteridae	demersal	6	3.2
Henonemus punctatus		Trichomycteridae	demersal	8.8	3.2
Ituglanis amazonicus		Trichomycteridae	benthopelagic	6.3	3.2
Ituglanis parkoi		Trichomycteridae	benthopelagic	6.3	3.2
Megalocentor echthrus		Trichomycteridae	benthopelagic	10.7	3.3
Ochmacanthus reinhardtii		Trichomycteridae	benthopelagic	5	3.1
Paracanthopoma parva		Trichomycteridae	demersal	3.3	3.1
Pareiodon microps		Trichomycteridae	demersal	8.8	3.2
Plectrochilus diabolicus		Trichomycteridae	benthopelagic	7.7	3.2
Plectrochilus machadoi		Trichomycteridae	benthopelagic	7.7	4.2
Pseudostegophilus nemurus		Trichomycteridae	demersal	15	3.3
Schultzichthys bondi		Trichomycteridae	benthopelagic	4.4	3.1
Stegophilus panzeri		Trichomycteridae	demersal	5	3.1
Trichomycterus anhanga		Trichomycteridae	demersal	1.6
Trichomycterus hasemani		Trichomycteridae	benthopelagic	10.6	3.2
Tridens melanops		Trichomycteridae	demersal	3.3	3.1
Tridensimilis brevis		Trichomycteridae	demersal	3	3.1
Tridentopsis pearsoni		Trichomycteridae	benthopelagic	2.8	3
Vandellia cirrhosa	Candiru	Trichomycteridae	demersal	20.7	4.4
Vandellia sanguinea		Trichomycteridae	demersal	10.3	3.3
Agoniates anchovia		Triportheidae	benthopelagic	18.1	3
Agoniates halecinus		Triportheidae	benthopelagic	26.2	3
Clupeacharax anchoveoides		Triportheidae	pelagic	8	3
Engraulisoma taeniatum		Triportheidae	pelagic	5.1	3
Triportheus albus		Triportheidae	benthopelagic	18.4	3.3
Triportheus angulatus		Triportheidae	benthopelagic	19.9	2.7
Triportheus auritus		Triportheidae	benthopelagic	20.4	2.8
Triportheus culter		Triportheidae	benthopelagic	29.9	2.8
Triportheus curtus		Triportheidae	benthopelagic	13	2.8
Triportheus elongatus	Elongate hatchetfish	Triportheidae	benthopelagic	29.5	2.9
Triportheus pictus		Triportheidae	benthopelagic	13.1	2.8
Triportheus rotundatus		Triportheidae	benthopelagic	21.7	2.4
			Means	19.3245	3.04435

## Sheet: Table 4
Data from FishBase (version (06/2014). www.fishbase.org
Okawango
Species	Name	Family	Habitat	Length (cm)	Trophic Level
Brycinus lateralis	Stripped robber	Alestidae	pelagic	17.1	3.5
Hydrocynus forskahlii	Elongate tigerfish	Alestidae	pelagic	95.2	4
Hydrocynus vittatus	Tiger fish	Alestidae	demersal	116.6	4.4
Micralestes acutidens	Sharptooth tetra	Alestidae	pelagic	11	2.9
Rhabdalestes maunensis	Okavango robber	Alestidae	pelagic	8.5	3.3
Amphilius uranoscopus	Stargazer mountain catfish	Amphiliidae	demersal	19.5	2.9
Zaireichthys conspicuus		Amphiliidae	benthopelagic	4.2
Zaireichthys dorae	Chobe sand catlet	Amphiliidae	demersal	3.3	3
Zaireichthys kavangoensis		Amphiliidae	benthopelagic	3.3
Zaireichthys pallidus		Amphiliidae	benthopelagic	3.1
Zaireichthys rotundiceps	Spotted sand catlet	Amphiliidae	demersal	4.6	3.4
Ctenopoma multispine	Manyspined ctenopoma	Anabantidae	benthopelagic	14	3.8
Microctenopoma intermedium		Anabantidae	benthopelagic	6.2	3.2
Chetia gracilis	Slender happy	Cichlidae	demersal	14.4	3.8
Hemichromis elongatus	Banded jewel cichlid	Cichlidae	benthopelagic	22.8	3.7
Hemichromis fasciatus	Banded jewelfish	Cichlidae	benthopelagic	24.9	3.2
Oreochromis andersonii	Three spotted tilapia	Cichlidae	benthopelagic	61	2
Oreochromis macrochir	Longfin tilapia	Cichlidae	benthopelagic	43	2.2
Oreochromis mossambicus	Mozambique tilapia	Cichlidae	benthopelagic	47.6	2
Pharyngochromis acuticeps	Zambezi bream	Cichlidae	benthopelagic	12	3.3
Pharyngochromis darlingi	Zambezi happy	Cichlidae	demersal	22	3.2
Pseudocrenilabrus philander	Southern mouthbrooder	Cichlidae	benthopelagic	13	3.7
Sargochromis carlottae	Rainbow happy	Cichlidae	demersal	42.1	3.6
Sargochromis codringtonii	Green happy	Cichlidae	demersal	39	3.1
Sargochromis giardi	Pink happy	Cichlidae	benthopelagic	48	3.5
Sargochromis greenwoodi	Greenwood's happy	Cichlidae	demersal	36.6	3.7
Serranochromis altus	Humpback largemouth	Cichlidae	demersal	56	4.2
Serranochromis angusticeps	Thinface cichlid	Cichlidae	demersal	50	4.5
Serranochromis jallae	Nembwe	Cichlidae	demersal	48.3	4.1
Serranochromis longimanus	Longfin largemouth	Cichlidae	demersal	36.6	3.9
Serranochromis macrocephalus	Purpleface largemouth	Cichlidae	demersal	42.7	4.2
Serranochromis robustus	Yellow-belly bream	Cichlidae	demersal	56	4.1
Serranochromis thumbergi	Brownspot largemouth	Cichlidae	demersal	33	3.7
Tilapia rendalli	Redbreast tilapia	Cichlidae	benthopelagic	45	2.2
Tilapia ruweti	Okavango tilapia	Cichlidae	benthopelagic	10.4	2.4
Tilapia sparrmanii	Banded tilapia	Cichlidae	benthopelagic	23.5	2.7
Clariallabes platyprosopos	Broadhead catfish	Clariidae	demersal	29.5	4.2
Clarias gariepinus	North African catfish	Clariidae	benthopelagic	170	3.2
Clarias liocephalus	Smoothhead catfish	Clariidae	demersal	32	3.3
Clarias ngamensis	Blunt-toothed African catfish	Clariidae	demersal	73	4.3
Clarias stappersii	Blotched catfish	Clariidae	demersal	50	4.5
Clarias theodorae	Snake catfish	Clariidae	demersal	35	4.4
Parauchenoglanis ngamensis	Zambezi grunter	Claroteidae	demersal	46.4	3.6
Barbus afrovernayi	Spottail barb	Cyprinidae	benthopelagic	5.7	3.5
Barbus barnardi	Blackback barb	Cyprinidae	benthopelagic	8.5	2.6
Barbus barotseensis	Barbus barb	Cyprinidae	benthopelagic	6.1	3
Barbus bifrenatus	Hyphen barb	Cyprinidae	benthopelagic	8.5	2.5
Barbus breviceps	Shorthead barb	Cyprinidae	benthopelagic	9.4	2.9
Barbus brevidorsalis	Dwarf barb	Cyprinidae	benthopelagic	4.6	3
Barbus eutaenia	Orangefin barb	Cyprinidae	benthopelagic	17.1	3.2
Barbus fasciolatus	African banded barb	Cyprinidae	benthopelagic	7.3	3
Barbus haasianus	Sickle barb	Cyprinidae	benthopelagic	3.9	3
Barbus kerstenii	Redspot barb	Cyprinidae	benthopelagic	11	3
Barbus lineomaculatus	Line-spotted barb	Cyprinidae	benthopelagic	10.5	2.9
Barbus lujae		Cyprinidae	benthopelagic	4.1	3
Barbus mattozi	Papermouth	Cyprinidae	benthopelagic	48.8	3.3
Barbus miolepis	Zigzag barb	Cyprinidae	benthopelagic	15.3	2.9
Barbus multilineatus	Copperstripe barb	Cyprinidae	benthopelagic	5.5	3
Barbus paludinosus	Straightfin barb	Cyprinidae	benthopelagic	18.3	2.8
Barbus poechii	Dashtail barb	Cyprinidae	benthopelagic	13.4	3.3
Barbus radiatus	Redeye barb	Cyprinidae	benthopelagic	14.6	2.8
Barbus thamalakanensis	Thamalakane barb	Cyprinidae	benthopelagic	5	2.6
Barbus unitaeniatus	Slender barb	Cyprinidae	benthopelagic	17.1	2.8
Coptostomabarbus wittei	Upjaw barb	Cyprinidae	benthopelagic	4.9	2.7
Labeo cylindricus	Redeye labeo	Cyprinidae	benthopelagic	48.8	2
Labeo lunatus	Upper Zambezi labeo	Cyprinidae	benthopelagic	48.8	2
Labeobarbus codringtonii	Upper Zambezi yellowfish	Cyprinidae	benthopelagic	39	3.7
Mesobola brevianalis	River sardine	Cyprinidae	benthopelagic	9.1	3.2
Opsaridium zambezense	Barred minnow	Cyprinidae	benthopelagic	18.3	3.4
Hemigrammocharax machadoi	Dwarf citharine	Distichodontidae	pelagic	4.9	3
Hemigrammocharax multifasciatus	Multibar citharine	Distichodontidae	pelagic	6	2.8
Nannocharax macropterus	Broad-barred citharine	Distichodontidae	pelagic	7.3	3.5
Awaous lateristriga	West African freshwater goby	Gobiidae	demersal	26.4	2.2
Hepsetus odoe	Kafue pike	Hepsetidae	demersal	70	4.5
Kneria angolensis		Kneriidae	benthopelagic	9	2
Kneria auriculata	Airbreathing shellear	Kneriidae	benthopelagic	7.8	2
Kneria polli	Western shellear	Kneriidae	benthopelagic	8.5	2
Parakneria fortuita	Cubango kneria	Kneriidae	benthopelagic	6.9	2
Mastacembelus frenatus	Longtail spiny eel	Mastacembelidae	demersal	48.8	3.9
Mastacembelus vanderwaali	Ocellated spiny eel	Mastacembelidae	benthopelagic	15.1	3.4
Chiloglanis fasciatus	Okavango suckermouth	Mochokidae	benthopelagic	6.4	3
Chiloglanis neumanni	Neumann's suckermouth	Mochokidae	benthopelagic	7.9	2.8
Synodontis leopardinus	Leopard squeaker	Mochokidae	benthopelagic	23.9	3.4
Synodontis macrostigma	Largespot squeaker	Mochokidae	benthopelagic	17.1	3.4
Synodontis macrostoma	Largemouth squeaker	Mochokidae	benthopelagic	11.2	2.9
Synodontis nigromaculatus	Blackspotted squeaker	Mochokidae	benthopelagic	38.5	3.1
Synodontis thamalakanensis		Mochokidae	demersal	21.4	2.9
Synodontis vanderwaali		Mochokidae	benthopelagic	19.6	2.9
Synodontis woosnami	Upper Zambezi squeaker	Mochokidae	benthopelagic	25	2.3
Cyphomyrus discorhynchus	Zambesi parrotfish	Mormyridae	demersal	37.8	3.2
Hippopotamyrus ansorgii	Slender stonebasher	Mormyridae	demersal	18.3	3.2
Marcusenius altisambesi		Mormyridae	demersal	23.8	3.1
Marcusenius macrolepidotus	Bulldog	Mormyridae	demersal	32	3.2
Mormyrus lacerda	Western bottlenose mormyrid	Mormyridae	demersal	50	3.7
Petrocephalus catostoma	Churchill	Mormyridae	demersal	16.6	3.4
Petrocephalus magnitrunci		Mormyridae	demersal	10.9
Petrocephalus okavangensis		Mormyridae	demersal	11.6
Pollimyrus castelnaui	Dwarf stonebasher	Mormyridae	demersal	8.5	3.2
Aplocheilichthys hutereaui	Meshscaled topminnow	Poeciliidae	benthopelagic	3.5	3.2
Aplocheilichthys johnstoni	Johnston's topminnow	Poeciliidae	benthopelagic	8.5	3.2
Aplocheilichthys katangae	Striped topminnow	Poeciliidae	benthopelagic	4.5	3.3
Aplocheilichthys moeruensis	Moero lampeye	Poeciliidae	benthopelagic	4	3.2
Schilbe intermedius	Silver catfish	Schilbeidae	pelagic	60.5	3.6
Schilbe mystus	African butter catfish	Schilbeidae	demersal	40	3.5
			Means	25.8288	3.19192

## Sheet: Table 5
Data from FishBase (version (06/2014). www.fishbase.org
Congo basin
Species	Name	Family	Habitat	Length (cm)	Trophic Level
Alestes inferus		Alestidae	pelagic	11.5	3
Alestes liebrechtsii		Alestidae	pelagic	40	2.9
Alestes macrophthalmus	Torpedo robber	Alestidae	pelagic	73.2	2
Alestopetersius bifasciatus		Alestidae	pelagic	6.9	3.1
Alestopetersius brichardi		Alestidae	pelagic	9.6	3.1
Alestopetersius caudalis	Yellowtail tetra	Alestidae	pelagic	6.2	3.1
Alestopetersius compressus		Alestidae	pelagic	9.5	3.1
Alestopetersius conspectus		Alestidae	pelagic	6.9
Alestopetersius hilgendorfi		Alestidae	pelagic	10	3.1
Alestopetersius leopoldianus		Alestidae	pelagic	9	3.1
Alestopetersius nigropterus		Alestidae	pelagic	7.9	3.1
Alestopetersius tumbensis		Alestidae	pelagic	5.3	3.1
Bathyaethiops breuseghemi		Alestidae	pelagic	7	3.1
Bathyaethiops caudomaculatus	African moon tetra	Alestidae	pelagic	8	3.1
Bathyaethiops greeni		Alestidae	pelagic	6	3.1
Brachypetersius cadwaladeri		Alestidae	pelagic	4.3	3.1
Brachypetersius huloti		Alestidae	pelagic	7	3.1
Brachypetersius pseudonummifer		Alestidae	pelagic	8	3.1
Brycinus abeli		Alestidae	pelagic	6.3	3
Brycinus bimaculatus		Alestidae	pelagic	14	2.9
Brycinus carmesinus		Alestidae	pelagic	19.5	2.9
Brycinus comptus		Alestidae	pelagic	6.3	3
Brycinus fwaensis		Alestidae	pelagic	4.8	3
Brycinus grandisquamis	Pinkfin Alestes	Alestidae	pelagic	31.7	2.9
Brycinus humilis		Alestidae	pelagic	7	3
Brycinus imberi	Spot-tail	Alestidae	demersal	19.8	3.3
Brycinus kingsleyae		Alestidae	pelagic	20.2	2.9
Brycinus lateralis	Stripped robber	Alestidae	pelagic	17.1	3.5
Brycinus macrolepidotus	True big-scale tetra	Alestidae	pelagic	64.7	2.3
Brycinus opisthotaenia		Alestidae	pelagic	15.6	2.9
Brycinus peringueyi		Alestidae	pelagic	13.3	3
Brycinus poptae		Alestidae	pelagic	19.5	2.9
Brycinus taeniurus		Alestidae	pelagic	12	2.9
Bryconaethiops boulengeri		Alestidae	pelagic	25	3.2
Bryconaethiops macrops		Alestidae	pelagic	14.6	3.2
Bryconaethiops microstoma		Alestidae	pelagic	21	3.2
Bryconaethiops yseuxi		Alestidae	pelagic	8.8	3.1
Clupeocharax schoutedeni		Alestidae	pelagic	25	3.2
Hemigrammopetersius pulcher		Alestidae	pelagic	4	3.1
Hydrocynus forskahlii	Elongate tigerfish	Alestidae	pelagic	95.2	4
Hydrocynus goliath	Giant tigerfish	Alestidae	pelagic	147.6	4.1
Hydrocynus vittatus	Tiger fish	Alestidae	demersal	116.6	4.4
Micralestes acutidens	Sharptooth tetra	Alestidae	pelagic	11	2.9
Micralestes ambiguus		Alestidae	pelagic	5.6	3.1
Micralestes congicus		Alestidae	pelagic	7.8	3.1
Micralestes fodori		Alestidae	pelagic	4	3.1
Micralestes holargyreus		Alestidae	pelagic	8	3.1
Micralestes humilis		Alestidae	pelagic	10.6	3.1
Micralestes lualabae		Alestidae	pelagic	9.2	3.1
Micralestes sardina		Alestidae	pelagic	11.6	3.2
Micralestes schelly		Alestidae	pelagic	6	3.1
Micralestes stormsi		Alestidae	pelagic	12.2	3.2
Nannopetersius lamberti		Alestidae	pelagic	8.5	3.1
Nannopetersius mutambuei		Alestidae	benthopelagic	14.7	3.1
Phenacogrammus altus		Alestidae	pelagic	6.5	3.1
Phenacogrammus ansorgii		Alestidae	pelagic	7.5	3.1
Phenacogrammus aurantiacus		Alestidae	benthopelagic	10	3.1
Phenacogrammus bleheri		Alestidae	benthopelagic	7.7	3.1
Phenacogrammus deheyni		Alestidae	benthopelagic	10	3.1
Phenacogrammus interruptus	Congo tetra	Alestidae	benthopelagic	8	3
Phenacogrammus major		Alestidae	benthopelagic	11.6	3.1
Phenacogrammus polli		Alestidae	benthopelagic	3.2	3
Phenacogrammus taeniatus		Alestidae	benthopelagic	4.9	3.1
Rhabdalestes aeratis		Alestidae	benthopelagic	6.2	3.1
Rhabdalestes rhodesiensis	Slender robber	Alestidae	pelagic	7	3.1
Rhabdalestes yokai		Alestidae	benthopelagic	6.4	3.1
Tricuspidalestes caeruleus		Alestidae	pelagic	4.5	3.1
Amphilius brevis		Amphiliidae	demersal	8.4	3
Amphilius cryptobullatus		Amphiliidae	demersal	16.4	3
Amphilius jacksonii	Marbled mountain catfish	Amphiliidae	demersal	15	3
Amphilius kivuensis		Amphiliidae	demersal	10.6	3
Amphilius lamani		Amphiliidae	demersal	9.6	3
Amphilius lentiginosus		Amphiliidae	demersal	14.4	3
Amphilius longirostris		Amphiliidae	demersal	14	3
Amphilius maesii		Amphiliidae	demersal	8.8	3
Amphilius opisthophthalmus		Amphiliidae	demersal	8.4	3
Amphilius platychir	Mountain barbel	Amphiliidae	demersal	20.4	3
Amphilius uranoscopus	Stargazer mountain catfish	Amphiliidae	demersal	19.5	2.9
Amphilius zairensis		Amphiliidae	demersal	11.4	3
Belonoglanis brieni		Amphiliidae	demersal	5	3
Belonoglanis tenuis		Amphiliidae	demersal	17.2	3.1
Congoglanis alula		Amphiliidae	demersal	17.2	3.1
Congoglanis howesi		Amphiliidae	demersal	13.8
Congoglanis inga		Amphiliidae	demersal	13.5
Congoglanis sagitta		Amphiliidae	demersal	16.6
Dolichamphilius brieni		Amphiliidae	demersal	5.4	3
Dolichamphilius longiceps		Amphiliidae	demersal	5.2	3
Doumea typica		Amphiliidae	demersal	16.1	3.1
Leptoglanis bouilloni		Amphiliidae	demersal	7.6	3
Leptoglanis xenognathus		Amphiliidae	demersal	7.8	3
Paramphilius baudoni		Amphiliidae	demersal	9.1	3
Phractura bovei		Amphiliidae	demersal	11	3.1
Phractura brevicauda		Amphiliidae	demersal	7	3
Phractura fasciata		Amphiliidae	demersal	12.5	3.1
Phractura intermedia		Amphiliidae	demersal	9.5	3.1
Phractura lindica		Amphiliidae	demersal	9	3.1
Phractura longicauda		Amphiliidae	demersal	7.7	3
Phractura macrura		Amphiliidae	demersal	11.1	3.1
Phractura scaphyrhynchura		Amphiliidae	demersal	15	3.1
Phractura tenuicauda		Amphiliidae	demersal	9.5	3.1
Psammphiletria delicata		Amphiliidae	demersal	2.5	3
Psammphiletria nasuta		Amphiliidae	demersal	2.9	3
Tetracamphilius angustifrons		Amphiliidae	demersal	4.8	3
Tetracamphilius clandestinus		Amphiliidae	demersal	2.4	3
Tetracamphilius notatus		Amphiliidae	demersal	4	3
Tetracamphilius pectinatus		Amphiliidae	demersal	4.1	3
Trachyglanis ineac		Amphiliidae	demersal	10.1	3.1
Trachyglanis intermedius		Amphiliidae	demersal	9	3.1
Trachyglanis minutus		Amphiliidae	demersal	5	3
Trachyglanis sanghensis		Amphiliidae	demersal	5	3
Zaireichthys brevis		Amphiliidae	demersal	3.4	3
Zaireichthys dorae	Chobe sand catlet	Amphiliidae	demersal	3.3	3
Zaireichthys flavomaculatus		Amphiliidae	demersal	4.8	3
Zaireichthys heterurus		Amphiliidae	demersal	4.2	3
Zaireichthys mandevillei		Amphiliidae	demersal	3.2	3
Zaireichthys rotundiceps	Spotted sand catlet	Amphiliidae	demersal	4.6	3.4
Zaireichthys zonatus		Amphiliidae	demersal	2.5	3
Ctenopoma acutirostre	Spotted ctenopoma	Anabantidae	benthopelagic	15	3.2
Ctenopoma ashbysmithi		Anabantidae	benthopelagic	4.8	3.1
Ctenopoma gabonense		Anabantidae	demersal	20.1
Ctenopoma kingsleyae	Tailspot ctenopoma	Anabantidae	benthopelagic	24.5	3.2
Ctenopoma maculatum		Anabantidae	benthopelagic	20	3.2
Ctenopoma multispine	Manyspined ctenopoma	Anabantidae	benthopelagic	14	3.8
Ctenopoma nigropannosum	Twospot climbing perch	Anabantidae	benthopelagic	17	3.2
Ctenopoma ocellatum	Eyespot ctenopoma	Anabantidae	benthopelagic	14	3.2
Ctenopoma weeksii	Mottled ctenopoma	Anabantidae	benthopelagic	12	3.1
Microctenopoma ansorgii	Ornate ctenopoma	Anabantidae	benthopelagic	8	3.3
Microctenopoma congicum	Congo ctenopoma	Anabantidae	benthopelagic	8.5	3.3
Microctenopoma fasciolatum	Banded ctenopoma	Anabantidae	benthopelagic	8	3.3
Microctenopoma intermedium		Anabantidae	benthopelagic	6.2	3.2
Microctenopoma lineatum		Anabantidae	benthopelagic	6.8	3.2
Microctenopoma milleri		Anabantidae	benthopelagic	5.5	3.2
Microctenopoma nanum	Dwarf ctenopoma	Anabantidae	benthopelagic	8	3.3
Microctenopoma nigricans		Anabantidae	benthopelagic	8.3	3.3
Microctenopoma ocellifer		Anabantidae	benthopelagic	4.5	3.1
Microctenopoma uelense		Anabantidae	benthopelagic	7.3	3.2
Heterotis niloticus	African bonytongue	Arapaimidae	pelagic	122	2.5
Arius latiscutatus	Rough-head sea catfish	Ariidae	demersal	85	3.3
Bagrus caeruleus		Bagridae	demersal	25.6	3.8
Bagrus lubosicus		Bagridae	demersal	29.6	3.8
Bagrus ubangensis		Bagridae	demersal	31.5	4.2
Parachanna insignis		Channidae	benthopelagic	41	3.9
Parachanna obscura		Channidae	demersal	61	3.4
Astatotilapia burtoni		Cichlidae	benthopelagic	18.3	3
Chetia mola		Cichlidae	benthopelagic	16.2	3.8
Chetia welwitschi	Angolan happy	Cichlidae	benthopelagic	17.9	3.9
Chromidotilapia schoutedeni		Cichlidae	benthopelagic	8.3	3.2
Congochromis dimidiatus		Cichlidae	demersal	6.2	3.2
Congochromis pugnatus		Cichlidae	demersal	6.3	3.2
Congochromis robustus		Cichlidae	pelagic	9.2
Congochromis sabinae		Cichlidae	benthopelagic	6.4	3.2
Congochromis squamiceps		Cichlidae	demersal	6.5	3.2
Congolapia bilineata		Cichlidae	demersal	21.4	2.3
Congolapia crassa		Cichlidae	pelagic	17.9
Congolapia louna		Cichlidae	pelagic	18.3
Ctenochromis luluae		Cichlidae	benthopelagic	9.6	3.3
Ctenochromis oligacanthus		Cichlidae	benthopelagic	6.7	3.2
Ctenochromis polli		Cichlidae	benthopelagic	9.1	3.3
Cyclopharynx fwae		Cichlidae	benthopelagic	15.1	3.3
Cyclopharynx schwetzi		Cichlidae	benthopelagic	10	3.3
Haplochromis snoeksi		Cichlidae	benthopelagic	13.9
Hemichromis cerasogaster		Cichlidae	benthopelagic	9	3.8
Hemichromis elongatus	Banded jewel cichlid	Cichlidae	benthopelagic	22.8	3.7
Hemichromis fasciatus	Banded jewelfish	Cichlidae	benthopelagic	24.9	3.2
Hemichromis lifalili		Cichlidae	benthopelagic	10	3.3
Hemichromis stellifer		Cichlidae	benthopelagic	12.2	3.4
Heterochromis multidens		Cichlidae	benthopelagic	29.5	2.8
Lamprologus congoensis		Cichlidae	benthopelagic	13	3.8
Lamprologus lethops		Cichlidae	benthopelagic	10	3.7
Lamprologus mocquardi		Cichlidae	benthopelagic	12	3.7
Lamprologus symoensi		Cichlidae	benthopelagic	6.4	3.5
Lamprologus teugelsi		Cichlidae	benthopelagic	10	3.7
Lamprologus tigripictilis		Cichlidae	benthopelagic	9.7	3.6
Lamprologus tumbanus		Cichlidae	benthopelagic	9	3.6
Lamprologus werneri		Cichlidae	benthopelagic	12.3	3.7
Nanochromis consortus		Cichlidae	demersal	6.3	3.2
Nanochromis minor		Cichlidae	demersal	2.9	3.1
Nanochromis nudiceps		Cichlidae	demersal	7	3.2
Nanochromis parilus		Cichlidae	demersal	5.4	3.3
Nanochromis splendens		Cichlidae	demersal	5.5	3.2
Nanochromis teugelsi		Cichlidae	benthopelagic	6.8	3.2
Nanochromis transvestitus		Cichlidae	demersal	4.2	3.1
Nanochromis wickleri		Cichlidae	demersal	8.5	3.3
Oreochromis andersonii	Three spotted tilapia	Cichlidae	benthopelagic	61	2
Oreochromis lepidurus		Cichlidae	benthopelagic	19	2.3
Oreochromis macrochir	Longfin tilapia	Cichlidae	benthopelagic	43	2.2
Oreochromis mweruensis		Cichlidae	benthopelagic	29	2
Oreochromis niloticus	Nile tilapia	Cichlidae	benthopelagic	73.2	2
Oreochromis salinicola		Cichlidae	benthopelagic	9.6	2.5
Oreochromis upembae		Cichlidae	benthopelagic	32.9	2.2
Orthochromis kalungwishiensis		Cichlidae	benthopelagic	12.1	2
Orthochromis luongoensis		Cichlidae	benthopelagic	7.8	2.1
Orthochromis polyacanthus		Cichlidae	benthopelagic	11.8	2
Orthochromis stormsi		Cichlidae	benthopelagic	10.2	2
Orthochromis torrenticola		Cichlidae	benthopelagic	8.1	2.1
Parananochromis caudifasciatus		Cichlidae	demersal	12.2	3.3
Parananochromis longirostris		Cichlidae	demersal	12.5	3.3
Paratilapia toddi		Cichlidae	benthopelagic	15	3.3
Pelmatochromis nigrofasciatus		Cichlidae	demersal	14.1	3.3
Pelmatochromis ocellifer		Cichlidae	demersal	13	3.3
Pelvicachromis subocellatus		Cichlidae	demersal	6.5	3.2
Pseudocrenilabrus nicholsi		Cichlidae	demersal	10.4	3.3
Pseudocrenilabrus philander	Southern mouthbrooder	Cichlidae	benthopelagic	13	3.7
Pterochromis congicus		Cichlidae	demersal	18.5	3.4
Sargochromis mellandi	Snaileater	Cichlidae	demersal	20	3.4
Sargochromis thysi		Cichlidae	demersal	23.5	3.4
Sarotherodon galilaeus	Mango tilapia	Cichlidae	demersal	41.5	2
Sarotherodon mvogoi		Cichlidae	demersal	24.6	2.1
Sarotherodon nigripinnis		Cichlidae	demersal	22	2.1
Schwetzochromis neodon		Cichlidae	benthopelagic	13.1	3.3
Serranochromis angusticeps	Thinface cichlid	Cichlidae	demersal	50	4.5
Serranochromis jallae	Nembwe	Cichlidae	demersal	48.3	4.1
Serranochromis macrocephalus	Purpleface largemouth	Cichlidae	demersal	42.7	4.2
Serranochromis spei		Cichlidae	demersal	37.1	4
Serranochromis stappersi		Cichlidae	benthopelagic	31.1	3.9
Serranochromis thumbergi	Brownspot largemouth	Cichlidae	demersal	33	3.7
Steatocranus bleheri		Cichlidae	demersal	8.3	3.2
Steatocranus casuarius	Lionhead cichlid	Cichlidae	demersal	10	3.3
Steatocranus gibbiceps		Cichlidae	demersal	10	3.3
Steatocranus glaber		Cichlidae	demersal	6.5	3.2
Steatocranus mpozoensis		Cichlidae	demersal	6.7	3.2
Steatocranus rouxi		Cichlidae	demersal	7.3	3.2
Steatocranus tinanti		Cichlidae	demersal	7.7	3.2
Steatocranus ubanguiensis		Cichlidae	demersal	6.5	3.2
Teleogramma brichardi		Cichlidae	demersal	10.7	3.3
Teleogramma depressa		Cichlidae	demersal	11.6	3.3
Teleogramma gracile		Cichlidae	demersal	8.7	3.3
Teleogramma monogramma		Cichlidae	demersal	9.4	3.3
Thoracochromis bakongo		Cichlidae	benthopelagic	10.8	3.3
Thoracochromis brauschi		Cichlidae	demersal	10.1	3.3
Thoracochromis callichromus		Cichlidae	demersal	12.2	3.3
Thoracochromis demeusii		Cichlidae	benthopelagic	13	3.3
Thoracochromis fasciatus		Cichlidae	benthopelagic	12	3.3
Thoracochromis moeruensis		Cichlidae	benthopelagic	10	3.3
Thoracochromis schwetzi		Cichlidae	benthopelagic	10.1	3.3
Tilapia baloni		Cichlidae	demersal	17.5	2.3
Tilapia cabrae		Cichlidae	demersal	37	2.1
Tilapia congica		Cichlidae	demersal	25	2.2
Tilapia guineensis	Guinean tilapia	Cichlidae	benthopelagic	36.6	2.8
Tilapia nyongana		Cichlidae	benthopelagic	21	2.3
Tilapia rendalli	Redbreast tilapia	Cichlidae	benthopelagic	45	2.2
Tilapia ruweti	Okavango tilapia	Cichlidae	benthopelagic	10.4	2.4
Tilapia sparrmanii	Banded tilapia	Cichlidae	benthopelagic	23.5	2.7
Tilapia tholloni		Cichlidae	benthopelagic	22	2.3
Tilapia zillii	Redbelly tilapia	Cichlidae	benthopelagic	48.8	2
Tylochromis aristoma		Cichlidae	benthopelagic	23.5	2.7
Tylochromis bangwelensis	Hump-back bream	Cichlidae	benthopelagic	27.5	3.2
Tylochromis elongatus		Cichlidae	benthopelagic	18.7	2.7
Tylochromis labrodon		Cichlidae	benthopelagic	27.6	2.6
Tylochromis lateralis		Cichlidae	benthopelagic	26	3.1
Tylochromis microdon		Cichlidae	benthopelagic	18.5	2.8
Tylochromis mylodon	Mweru hump-backed bream	Cichlidae	benthopelagic	26.8	3.3
Tylochromis polylepis		Cichlidae	demersal	25.1	3
Tylochromis praecox		Cichlidae	benthopelagic	15.9	2.6
Tylochromis pulcher		Cichlidae	benthopelagic	27.9	3.2
Tylochromis regani		Cichlidae	benthopelagic	27.5	2.6
Tylochromis robertsi		Cichlidae	benthopelagic	25.7	2.4
Tylochromis variabilis		Cichlidae	benthopelagic	25.1	2.6
Citharinus congicus		Citharinidae	pelagic	43	2.3
Citharinus gibbosus		Citharinidae	pelagic	61	2.2
Citharinus macrolepis		Citharinidae	pelagic	75	2.1
Channallabes apus	Eel catfish	Clariidae	demersal	32.7	3.5
Channallabes sanghaensis		Clariidae	benthopelagic	27	3.4
Clariallabes brevibarbis		Clariidae	demersal	29	3.7
Clariallabes centralis		Clariidae	demersal	20.5	3.6
Clariallabes heterocephalus		Clariidae	demersal	13.7	3.5
Clariallabes laticeps		Clariidae	demersal	20	3.6
Clariallabes longicauda		Clariidae	demersal	28	3.7
Clariallabes manyangae		Clariidae	demersal	15	3.5
Clariallabes melas		Clariidae	demersal	26	3.7
Clariallabes simeonsi		Clariidae	demersal	7.1	3.3
Clariallabes teugelsi		Clariidae	demersal	17	3.6
Clariallabes uelensis		Clariidae	demersal	9.8	3.4
Clariallabes variabilis		Clariidae	demersal	15.8	3.6
Clarias albopunctatus		Clariidae	demersal	19.5	3.3
Clarias alluaudi	Alluaud's catfish	Clariidae	demersal	42.7	3.2
Clarias angolensis	Angolian walking catfish	Clariidae	demersal	35	3.3
Clarias buthupogon		Clariidae	demersal	109.8	3.3
Clarias camerunensis		Clariidae	demersal	46.6	3.5
Clarias dhonti		Clariidae	demersal	18.5	3.3
Clarias dumerilii		Clariidae	demersal	30.5	3.3
Clarias gabonensis		Clariidae	demersal	36	3.3
Clarias gariepinus	North African catfish	Clariidae	benthopelagic	170	3.2
Clarias hilli		Clariidae	demersal	19.6	3.3
Clarias jaensis		Clariidae	demersal	48.3	3.4
Clarias liocephalus	Smoothhead catfish	Clariidae	demersal	32	3.3
Clarias longior		Clariidae	demersal	22.5	3.3
Clarias ngamensis	Blunt-toothed African catfish	Clariidae	demersal	73	4.3
Clarias nigromarmoratus		Clariidae	demersal	17.6	3.3
Clarias pachynema		Clariidae	demersal	35.6	3.4
Clarias platycephalus		Clariidae	demersal	37.6	4.2
Clarias stappersii	Blotched catfish	Clariidae	demersal	50	4.5
Clarias submarginatus		Clariidae	demersal	16	3.3
Clarias theodorae	Snake catfish	Clariidae	demersal	35	4.4
Dolichallabes microphthalmus		Clariidae	demersal	25	3.4
Gymnallabes nops		Clariidae	demersal	6.9	3.2
Heterobranchus boulengeri		Clariidae	demersal	64	3.5
Heterobranchus longifilis	Sampa	Clariidae	demersal	183	3.7
Platyallabes tihoni		Clariidae	demersal	52.8	3.5
Platyclarias machadoi		Clariidae	demersal	20.1	3.4
Amarginops platus		Claroteidae	demersal	20.7	3.3
Anaspidoglanis macrostomus	Flatnose catfish	Claroteidae	demersal	24	3.8
Auchenoglanis occidentalis	Bubu	Claroteidae	demersal	85.4	2.9
Chrysichthys brevibarbis		Claroteidae	demersal	48.8	3
Chrysichthys cranchii	Kokuni	Claroteidae	demersal	150	3.1
Chrysichthys delhezi		Claroteidae	demersal	28.3	3
Chrysichthys dendrophorus		Claroteidae	demersal	60	3.1
Chrysichthys duttoni		Claroteidae	demersal	27.3	3
Chrysichthys habereri		Claroteidae	demersal	35.4	3
Chrysichthys helicophagus		Claroteidae	demersal	22	3.4
Chrysichthys laticeps		Claroteidae	demersal	126	3.1
Chrysichthys longibarbis		Claroteidae	demersal	30.5	3
Chrysichthys longipinnis	Aluminum catfish	Claroteidae	demersal	85.4	3.1
Chrysichthys mabusi		Claroteidae	demersal	50	3
Chrysichthys nigrodigitatus	Bagrid catfish	Claroteidae	demersal	79.3	2.6
Chrysichthys okae		Claroteidae	demersal	9.8	3
Chrysichthys ornatus	Ornate bagrid	Claroteidae	demersal	30.7	3
Chrysichthys polli		Claroteidae	demersal	13.6	3
Chrysichthys praecox		Claroteidae	demersal	7.6	3
Chrysichthys punctatus		Claroteidae	demersal	18.9	3
Chrysichthys sharpii	Shovelnose catfish	Claroteidae	demersal	37	3
Chrysichthys thonneri		Claroteidae	demersal	61	3.1
Chrysichthys wagenaari		Claroteidae	demersal	70	3.1
Gephyroglanis congicus		Claroteidae	demersal	52.5	3.4
Gephyroglanis habereri		Claroteidae	demersal	24.6	3.3
Gnathobagrus depressus		Claroteidae	demersal	23.8	3
Notoglanidium pallidum		Claroteidae	demersal	10.1	3.3
Parauchenoglanis altipinnis		Claroteidae	demersal	21	3.5
Parauchenoglanis balayi		Claroteidae	demersal	39	3.7
Parauchenoglanis monkei	Dotted catfish	Claroteidae	demersal	24.5	3.7
Parauchenoglanis ngamensis	Zambezi grunter	Claroteidae	demersal	46.4	3.6
Parauchenoglanis pantherinus		Claroteidae	demersal	13.7	3.5
Parauchenoglanis punctatus		Claroteidae	demersal	50	3.8
Congothrissa gossei	Smoothbelly pellonuline	Clupeidae	pelagic	4.3	3.3
Ethmalosa fimbriata	Bonga shad	Clupeidae	pelagic-neritic	45	2.5
Laeviscutella dekimpei	Roundbelly pellonuline	Clupeidae	pelagic	4.9	3.1
Microthrissa congica	Bigscale pellonuline	Clupeidae	pelagic	7.3	3.1
Microthrissa minuta	Dungu sprat	Clupeidae	pelagic	4.3	3.1
Microthrissa moeruensis	Lake Mweru sprat	Clupeidae	pelagic	4.3	3.1
Microthrissa royauxi	Royal sprat	Clupeidae	pelagic	9.9	3.2
Microthrissa whiteheadi		Clupeidae	pelagic	7	3.1
Nannothrissa parva	Lake Tumba dwarf sprat	Clupeidae	pelagic	5.1	2.7
Nannothrissa stewarti	Mai-ndombe dwarf sprat	Clupeidae	pelagic	2.7	3
Odaxothrissa ansorgii	Ansorge fangtooth pellonuline	Clupeidae	pelagic	15.9	3.2
Odaxothrissa losera	Losera fangtooth pellonuline	Clupeidae	pelagic	15.9	3.2
Odaxothrissa vittata	Regan's fangtooth pellonuline	Clupeidae	pelagic	15.9	3.2
Pellonula leonensis	Smalltoothed pellonula	Clupeidae	pelagic-neritic	10	3.3
Pellonula vorax	Bigtoothed pellonula	Clupeidae	pelagic-neritic	14.6	3.2
Potamothrissa acutirostris	Sharpnosed sawtooth pellonuline	Clupeidae	pelagic	8.5	3.2
Potamothrissa obtusirostris	Bluntnosed sawtooth pellonuline	Clupeidae	pelagic	7.3	3.2
Potamothrissa whiteheadi	Whitehead's sawtooth pellonuline	Clupeidae	pelagic	5.7	3.1
Barbus ablabes		Cyprinidae	benthopelagic	11.7	2.5
Barbus afrohamiltoni	Hamilton's barb	Cyprinidae	benthopelagic	21.4	3.2
Barbus afrovernayi	Spottail barb	Cyprinidae	benthopelagic	5.7	3.5
Barbus amanpoae		Cyprinidae	benthopelagic	4	3
Barbus ansorgii		Cyprinidae	benthopelagic	8.2	2.9
Barbus aspilus		Cyprinidae	benthopelagic	13	2.9
Barbus atromaculatus		Cyprinidae	benthopelagic	6.8	2.9
Barbus barotseensis	Barbus barb	Cyprinidae	benthopelagic	6.1	3
Barbus baudoni		Cyprinidae	benthopelagic	4	3
Barbus bifrenatus	Hyphen barb	Cyprinidae	benthopelagic	8.5	2.5
Barbus brachygramma	Linespotted ufipa barb	Cyprinidae	benthopelagic	5.2	3
Barbus brazzai		Cyprinidae	benthopelagic	11.9	2.9
Barbus brevidorsalis	Dwarf barb	Cyprinidae	benthopelagic	4.6	3
Barbus camptacanthus	African redfinned barb	Cyprinidae	benthopelagic	15.5	2.9
Barbus candens		Cyprinidae	benthopelagic	3.2	3
Barbus carens		Cyprinidae	benthopelagic	3.9	3
Barbus castrasibutum		Cyprinidae	benthopelagic	5.7	3
Barbus caudosignatus		Cyprinidae	benthopelagic	6	3
Barbus chicapaensis		Cyprinidae	benthopelagic	10.5	2.9
Barbus chiumbeensis		Cyprinidae	benthopelagic	8	2.9
Barbus citrinus		Cyprinidae	benthopelagic	5	3
Barbus dartevellei		Cyprinidae	benthopelagic	11.7	2.9
Barbus deguidei		Cyprinidae	benthopelagic	4.5	3
Barbus erythrozonus		Cyprinidae	benthopelagic	3.2	3
Barbus eutaenia	Orangefin barb	Cyprinidae	benthopelagic	17.1	3.2
Barbus fasciolatus	African banded barb	Cyprinidae	benthopelagic	7.3	3
Barbus fasolt		Cyprinidae	benthopelagic	50	2.8
Barbus gestetneri		Cyprinidae	benthopelagic	30.4	2.9
Barbus guirali		Cyprinidae	benthopelagic	15.5	2.9
Barbus haasianus	Sickle barb	Cyprinidae	benthopelagic	3.9	3
Barbus holotaenia	Spotscale barb	Cyprinidae	benthopelagic	14.6	2.8
Barbus hulstaerti	Butterfly barb	Cyprinidae	benthopelagic	3.5	3
Barbus humeralis		Cyprinidae	benthopelagic	7	2.9
Barbus iturii		Cyprinidae	benthopelagic	36.5	2.9
Barbus jae	Jae barb	Cyprinidae	benthopelagic	3.8	3
Barbus janssensi		Cyprinidae	benthopelagic	4.9	3
Barbus jubbi		Cyprinidae	benthopelagic	20.3	2.9
Barbus kamolondoensis		Cyprinidae	benthopelagic	9.4	2.9
Barbus kerstenii	Redspot barb	Cyprinidae	benthopelagic	11	3
Barbus kessleri	Gillbar barb	Cyprinidae	benthopelagic	7.7	2.9
Barbus lamani		Cyprinidae	benthopelagic	10.2	2.9
Barbus lineomaculatus	Line-spotted barb	Cyprinidae	benthopelagic	10.5	2.9
Barbus longifilis		Cyprinidae	benthopelagic	31.7	2.9
Barbus lornae		Cyprinidae	pelagic	6.6	3
Barbus luapulae		Cyprinidae	benthopelagic	13	2.9
Barbus lujae		Cyprinidae	benthopelagic	4.1	3
Barbus lukindae		Cyprinidae	benthopelagic	7.5	2.9
Barbus lukusiensis		Cyprinidae	benthopelagic	11	2.9
Barbus luluae		Cyprinidae	benthopelagic	4.4	3
Barbus machadoi		Cyprinidae	benthopelagic	9.3	2.9
Barbus macroceps		Cyprinidae	benthopelagic	32	2.9
Barbus macrops	Blackstripe barb	Cyprinidae	benthopelagic	12	3
Barbus marmoratus		Cyprinidae	benthopelagic	6.5	3
Barbus martorelli		Cyprinidae	benthopelagic	12	2.9
Barbus matthesi		Cyprinidae	benthopelagic	7.6	2.9
Barbus mattozi	Papermouth	Cyprinidae	benthopelagic	48.8	3.3
Barbus mawambi		Cyprinidae	benthopelagic	15	2.9
Barbus mawambiensis		Cyprinidae	benthopelagic	15	2.9
Barbus mediosquamatus		Cyprinidae	benthopelagic	5.7	3
Barbus miolepis	Zigzag barb	Cyprinidae	benthopelagic	15.3	2.9
Barbus mirabilis		Cyprinidae	benthopelagic	43.1	2.9
Barbus motebensis	Marico barb	Cyprinidae	benthopelagic	9.8	2.9
Barbus multilineatus	Copperstripe barb	Cyprinidae	benthopelagic	5.5	3
Barbus myersi		Cyprinidae	benthopelagic	4.7	3
Barbus nanningsi		Cyprinidae	benthopelagic	32	2.9
Barbus neefi	Sidespot barb	Cyprinidae	benthopelagic	8.5	2.9
Barbus neumayeri	Neumayer's barb	Cyprinidae	benthopelagic	14.4	3
Barbus nigrifilis		Cyprinidae	benthopelagic	2.7	3
Barbus okae		Cyprinidae	benthopelagic	4	2.9
Barbus oligogrammus		Cyprinidae	benthopelagic	8.2	2.9
Barbus owenae		Cyprinidae	benthopelagic	4.5	3
Barbus paludinosus	Straightfin barb	Cyprinidae	benthopelagic	18.3	2.8
Barbus papilio		Cyprinidae	benthopelagic	2.6	3
Barbus paucisquamatus		Cyprinidae	benthopelagic	30.3	2.9
Barbus pellegrini	Pellegrin's barb	Cyprinidae	benthopelagic	14.3	2.9
Barbus petchkovskyi		Cyprinidae	benthopelagic	36.6	2.9
Barbus poechii	Dashtail barb	Cyprinidae	benthopelagic	13.4	3.3
Barbus pygmaeus		Cyprinidae	benthopelagic	2.6	3
Barbus radiatus	Redeye barb	Cyprinidae	benthopelagic	14.6	2.8
Barbus stanleyi		Cyprinidae	benthopelagic	11.8	2.9
Barbus stappersii		Cyprinidae	benthopelagic	72.5	2.8
Barbus syntrechalepis		Cyprinidae	benthopelagic	2.8	3
Barbus taeniurus		Cyprinidae	benthopelagic	12	2.9
Barbus tetraspilus		Cyprinidae	benthopelagic	5	3
Barbus tetrastigma		Cyprinidae	benthopelagic	5.8	3
Barbus tomiensis		Cyprinidae	benthopelagic	6.2	3
Barbus trachypterus		Cyprinidae	benthopelagic	29.2	2.9
Barbus trimaculatus	Threespot barb	Cyprinidae	benthopelagic	18.3	3.2
Barbus trinotatus		Cyprinidae	benthopelagic	8.6	2.9
Barbus unitaeniatus	Slender barb	Cyprinidae	benthopelagic	17.1	2.8
Barbus urostigma		Cyprinidae	benthopelagic	12	2.9
Barbus urotaenia		Cyprinidae	benthopelagic	5	3
Barbus vanderysti		Cyprinidae	benthopelagic	9.6	2.9
Caecobarbus geertsii	Congo blind barb	Cyprinidae	benthopelagic	12	3.5
Chelaethiops congicus		Cyprinidae	benthopelagic	11	2.9
Chelaethiops elongatus		Cyprinidae	benthopelagic	6.2	2.9
Chelaethiops minutus		Cyprinidae	benthopelagic	13.4	2.9
Clypeobarbus bomokandi		Cyprinidae	pelagic	5.4	2.9
Clypeobarbus congicus	Congo barb	Cyprinidae	benthopelagic	7.5	2.9
Clypeobarbus pleuropholis		Cyprinidae	benthopelagic	4	3
Clypeobarbus schoutedeni		Cyprinidae	benthopelagic	3.8	3
Coptostomabarbus bellcrossi		Cyprinidae	benthopelagic	3.3	3
Coptostomabarbus wittei	Upjaw barb	Cyprinidae	benthopelagic	4.9	2.7
Garra congoensis		Cyprinidae	benthopelagic	10	2.3
Garra dembeensis	Dembea stone lapper	Cyprinidae	benthopelagic	13.4	2
Garra hindii		Cyprinidae	benthopelagic	7
Garra ornata		Cyprinidae	benthopelagic	8.8	2.5
Labeo alticentralis		Cyprinidae	benthopelagic	15.4	2.5
Labeo altivelis	Rednose labeo	Cyprinidae	benthopelagic	49	2
Labeo annectens		Cyprinidae	benthopelagic	48.5	2.2
Labeo barbatus		Cyprinidae	benthopelagic	68.6	2.1
Labeo chariensis		Cyprinidae	benthopelagic	27
Labeo congoro	Purple labeo	Cyprinidae	benthopelagic	50.6	2.2
Labeo coubie	African carp	Cyprinidae	benthopelagic	91.5	2
Labeo cyclopinnis		Cyprinidae	benthopelagic	13.2	2.5
Labeo cyclorhynchus	Harlequin sharkminnow	Cyprinidae	benthopelagic	16	2.5
Labeo cylindricus	Redeye labeo	Cyprinidae	benthopelagic	48.8	2
Labeo degeni		Cyprinidae	benthopelagic	83	2
Labeo dhonti		Cyprinidae	benthopelagic	11.5	2.5
Labeo falcipinnis		Cyprinidae	benthopelagic	46.5	2.2
Labeo fulakariensis		Cyprinidae	benthopelagic	15.9	2.5
Labeo greenii		Cyprinidae	benthopelagic	27	2.3
Labeo kibimbi		Cyprinidae	benthopelagic	57.3	2.1
Labeo kirkii		Cyprinidae	benthopelagic	24	2.3
Labeo lineatus		Cyprinidae	benthopelagic	78	2
Labeo longipinnis		Cyprinidae	benthopelagic	31.7	2.3
Labeo lualabaensis		Cyprinidae	benthopelagic	11.7	2.5
Labeo lukulae	Red-spot mudsucker	Cyprinidae	benthopelagic	30.5	2.3
Labeo luluae		Cyprinidae	benthopelagic	3.9	2.8
Labeo macrostoma		Cyprinidae	benthopelagic	73	2
Labeo maleboensis		Cyprinidae	benthopelagic	8.6	2.6
Labeo mokotoensis		Cyprinidae	benthopelagic	18	2.4
Labeo nasus		Cyprinidae	benthopelagic	19	2.4
Labeo nigricans		Cyprinidae	benthopelagic	5.6	2.7
Labeo parvus		Cyprinidae	benthopelagic	46.4	2
Labeo polli		Cyprinidae	benthopelagic	22.5	2.4
Labeo quadribarbis		Cyprinidae	benthopelagic	6	2.7
Labeo rectipinnis		Cyprinidae	benthopelagic	12.4	2.5
Labeo reidi		Cyprinidae	benthopelagic	6.7	2.7
Labeo simpsoni		Cyprinidae	benthopelagic	26.8	2.3
Labeo sorex		Cyprinidae	benthopelagic	42.9	2.2
Labeo weeksii	Sicklefin labeo	Cyprinidae	benthopelagic	29	2.3
Labeobarbus batesii		Cyprinidae	benthopelagic	43.5	2.9
Labeobarbus cardozoi		Cyprinidae	benthopelagic	53	2.8
Labeobarbus caudovittatus		Cyprinidae	benthopelagic	80	2.8
Labeobarbus habereri		Cyprinidae	benthopelagic	16.2	2.9
Labeobarbus progenys		Cyprinidae	benthopelagic	18	2.9
Leptocypris lujae		Cyprinidae	benthopelagic	15.5	2.9
Leptocypris modestus		Cyprinidae	benthopelagic	11	2.9
Leptocypris weeksii		Cyprinidae	benthopelagic	7	2.9
Leptocypris weynsii		Cyprinidae	benthopelagic	9.5	2.9
Mesobola brevianalis	River sardine	Cyprinidae	benthopelagic	9.1	3.2
Mesobola moeruensis		Cyprinidae	benthopelagic	3.7	3
Opsaridium boweni		Cyprinidae	benthopelagic	14.8	3.5
Opsaridium engrauloides		Cyprinidae	benthopelagic	8.2	3.4
Opsaridium leleupi		Cyprinidae	benthopelagic	14	3.5
Opsaridium maculicauda		Cyprinidae	benthopelagic	4.2	3.2
Opsaridium ubangiense		Cyprinidae	benthopelagic	12	3.5
Opsaridium zambezense	Barred minnow	Cyprinidae	benthopelagic	18.3	3.4
Raiamas batesii		Cyprinidae	benthopelagic	12	2.9
Raiamas buchholzi		Cyprinidae	benthopelagic	14	2.9
Raiamas christyi	Coppernose barb	Cyprinidae	benthopelagic	17.7	2.9
Raiamas kheeli		Cyprinidae	demersal	11.7	2.9
Raiamas longirostris		Cyprinidae	benthopelagic	12	2.9
Raiamas salmolucius		Cyprinidae	benthopelagic	18	2.9
Varicorhinus altipinnis		Cyprinidae	benthopelagic	41.2	2.8
Varicorhinus ansorgii		Cyprinidae	benthopelagic	30	2.8
Varicorhinus brauni		Cyprinidae	benthopelagic	23	2.8
Varicorhinus iphthimostoma		Cyprinidae	benthopelagic	18.1	2.9
Varicorhinus longidorsalis		Cyprinidae	benthopelagic	32	2.8
Varicorhinus lufupensis		Cyprinidae	benthopelagic	19.4	2.9
Varicorhinus macrolepidotus		Cyprinidae	benthopelagic	54	2.8
Varicorhinus pellegrini		Cyprinidae	benthopelagic	21.2	2.9
Varicorhinus robertsi		Cyprinidae	benthopelagic	7.9	2.9
Varicorhinus upembensis		Cyprinidae	benthopelagic	24.8	2.8
Varicorhinus wittei		Cyprinidae	benthopelagic	33.5	2.8
Belonophago hutsebouti		Distichodontidae	pelagic	9.3	3
Belonophago tinanti		Distichodontidae	pelagic	12	3
Congocharax olbrechtsi		Distichodontidae	pelagic	3.7	3
Distichodus affinis	Silver distichodus	Distichodontidae	pelagic	20	2.4
Distichodus altus		Distichodontidae	pelagic	15	2.5
Distichodus antonii		Distichodontidae	pelagic	80	2
Distichodus atroventralis		Distichodontidae	pelagic	29	2.3
Distichodus decemmaculatus		Distichodontidae	pelagic	7.5	2.6
Distichodus fasciolatus	Sharktail distichodus	Distichodontidae	pelagic	60	2
Distichodus langi		Distichodontidae	pelagic	62.2	2
Distichodus lusosso	Longsnout distichodus	Distichodontidae	pelagic	38	2.2
Distichodus maculatus	Spotted citharinid	Distichodontidae	pelagic	31	2.3
Distichodus noboli		Distichodontidae	pelagic	19	2.4
Distichodus notospilus		Distichodontidae	pelagic	19.5	2.4
Distichodus sexfasciatus	Sixbar distichodus	Distichodontidae	pelagic	92.7	2.8
Distichodus teugelsi		Distichodontidae	pelagic	6.9	2.7
Dundocharax bidentatus		Distichodontidae	pelagic	2.3	3
Eugnathichthys eetveldii		Distichodontidae	pelagic	29	2.9
Eugnathichthys macroterolepis		Distichodontidae	pelagic	14.5	4.2
Eugnathichthys virgatus		Distichodontidae	benthopelagic	129.3
Hemigrammocharax angolensis		Distichodontidae	pelagic	3.7	2.9
Hemigrammocharax lineostriatus		Distichodontidae	pelagic	3.7	2.9
Hemigrammocharax minutus		Distichodontidae	pelagic	3.3	2.9
Hemigrammocharax multifasciatus	Multibar citharine	Distichodontidae	pelagic	6	2.8
Hemigrammocharax ocellicauda		Distichodontidae	pelagic	4.3	2.9
Hemigrammocharax rubensteini		Distichodontidae	benthopelagic	3.2
Hemigrammocharax uniocellatus		Distichodontidae	pelagic	3.4	2.9
Hemigrammocharax wittei		Distichodontidae	pelagic	4.8	2.9
Hemistichodus lootensi		Distichodontidae	pelagic	5.6	3
Hemistichodus mesmaekersi		Distichodontidae	pelagic	5.9	3
Ichthyborus congolensis		Distichodontidae	pelagic	19.5	3
Ichthyborus ornatus		Distichodontidae	pelagic	18	3
Mesoborus crocodilus		Distichodontidae	pelagic	30.5	2.9
Microstomatichthyoborus bashforddeani		Distichodontidae	pelagic	7.5	3
Microstomatichthyoborus katangae		Distichodontidae	pelagic	5.4	3
Nannaethiops unitaeniatus	Oneline tetra	Distichodontidae	pelagic	6.2	3
Nannocharax brevis		Distichodontidae	pelagic	4.5	3.3
Nannocharax elongatus		Distichodontidae	pelagic	8.2	3.5
Nannocharax fasciatus		Distichodontidae	pelagic	8.1	3.5
Nannocharax gracilis		Distichodontidae	pelagic	4.3	3.3
Nannocharax hollyi		Distichodontidae	pelagic	3.9	3.2
Nannocharax intermedius		Distichodontidae	pelagic	6.8	3.4
Nannocharax luapulae		Distichodontidae	pelagic	4.4	3.3
Nannocharax macropterus	Broad-barred citharine	Distichodontidae	pelagic	7.3	3.5
Nannocharax parvus		Distichodontidae	pelagic	6.5	3.3
Nannocharax procatopus		Distichodontidae	demersal	8	3.5
Nannocharax pteron		Distichodontidae	pelagic	5.8	3.4
Nannocharax schoutedeni		Distichodontidae	pelagic	4.5	3.3
Nannocharax taenia		Distichodontidae	pelagic	7	3.4
Neolebias ansorgii		Distichodontidae	pelagic	3.2	3.3
Neolebias gracilis		Distichodontidae	pelagic	4.8	3.5
Neolebias philippei		Distichodontidae	pelagic	3.5	3.3
Neolebias trewavasae		Distichodontidae	pelagic	5	2.8
Neolebias trilineatus	Threeline tetra	Distichodontidae	pelagic	4	3.4
Neolebias unifasciatus		Distichodontidae	pelagic	5.1	3.5
Paraphago rostratus		Distichodontidae	pelagic	13	3
Xenocharax spilurus		Distichodontidae	pelagic	26	2.9
Bostrychus africanus		Eleotridae	demersal	21	3.9
Dormitator lebretonis		Eleotridae	demersal	12.4	2.5
Eleotris daganensis		Eleotridae	demersal	12.1	3.5
Eleotris senegalensis		Eleotridae	demersal	21.2	3.6
Eleotris vittata		Eleotridae	demersal	26.5	3.7
Kribia kribensis		Eleotridae	demersal	5.7	3.4
Kribia nana		Eleotridae	demersal	4.9	3.3
Kribia uellensis		Eleotridae	demersal	3.5	3.2
Elops lacerta	West African ladyfish	Elopidae	pelagic-neritic	100	4.2
Awaous lateristriga	West African freshwater goby	Gobiidae	demersal	26.4	2.2
Bathygobius casamancus		Gobiidae	demersal	8.1	3.3
Bathygobius soporator	Frillfin goby	Gobiidae	demersal	15	3.5
Gobionellus occidentalis		Gobiidae	demersal	13.2	3.4
Mauligobius nigri		Gobiidae	demersal	8.7	3.3
Periophthalmus barbarus	Atlantic mudskipper	Gobiidae	reef-associated	25	3.2
Porogobius schlegelii		Gobiidae	demersal	14.9	2.9
Yongeichthys thomasi		Gobiidae	demersal	6	3.2
Hepsetus lineata		Hepsetidae	demersal	34.5
Hepsetus odoe	Kafue pike	Hepsetidae	demersal	70	4.5
Kneria angolensis		Kneriidae	benthopelagic	9	2
Kneria ansorgii		Kneriidae	benthopelagic	12.5	2
Kneria auriculata	Airbreathing shellear	Kneriidae	benthopelagic	7.8	2
Kneria katangae		Kneriidae	benthopelagic	5.9	2
Kneria paucisquamata		Kneriidae	benthopelagic	5.9	2.2
Kneria polli	Western shellear	Kneriidae	benthopelagic	8.5	2
Kneria stappersii		Kneriidae	benthopelagic	5.9	2.5
Kneria wittei		Kneriidae	benthopelagic	10.5	2
Parakneria abbreviata		Kneriidae	benthopelagic	8.8	2
Parakneria cameronensis		Kneriidae	benthopelagic	11.2	2
Parakneria damasi		Kneriidae	benthopelagic	6.9	2
Parakneria kissi		Kneriidae	benthopelagic	11.8	2
Parakneria ladigesi		Kneriidae	benthopelagic	7.8	2
Parakneria lufirae		Kneriidae	benthopelagic	8.3	2
Parakneria malaissei		Kneriidae	benthopelagic	9.5	2
Parakneria thysi		Kneriidae	benthopelagic	5.1	2.2
Parakneria vilhenae		Kneriidae	benthopelagic	6.7	2
Lates mariae	Bigeye lates	Latidae	demersal	80	4.2
Lates niloticus	Nile perch	Latidae	demersal	200	4.5
Malapterurus melanochir		Malapteruridae	demersal	119.6	3.5
Malapterurus microstoma	Smallmouth electric catfish	Malapteruridae	benthopelagic	67.7	3.5
Malapterurus monsembeensis		Malapteruridae	benthopelagic	70.8	3.5
Paradoxoglanis caudivittatus		Malapteruridae	demersal	15.3	3.3
Paradoxoglanis cryptus		Malapteruridae	demersal	14.6	3.3
Paradoxoglanis parvus		Malapteruridae	demersal	20.6	3.3
Mastacembelus aviceps		Mastacembelidae	demersal	17.5	3.4
Mastacembelus brachyrhinus		Mastacembelidae	demersal	20	3.4
Mastacembelus brichardi	Blind spiny eel	Mastacembelidae	demersal	20.7	3.4
Mastacembelus catchpolei		Mastacembelidae	demersal	29.5	3.5
Mastacembelus congicus		Mastacembelidae	benthopelagic	53.1	3.6
Mastacembelus crassus		Mastacembelidae	demersal	15.7	3.4
Mastacembelus cryptacanthus		Mastacembelidae	demersal	36.8	3.5
Mastacembelus cunningtoni		Mastacembelidae	benthopelagic	58	3.7
Mastacembelus frenatus	Longtail spiny eel	Mastacembelidae	demersal	48.8	3.9
Mastacembelus greshoffi		Mastacembelidae	demersal	40.6	3.6
Mastacembelus latens		Mastacembelidae	demersal	7.2	3.3
Mastacembelus marchei		Mastacembelidae	benthopelagic	32.9	3.4
Mastacembelus moeruensis		Mastacembelidae	benthopelagic	26.5	3.5
Mastacembelus niger		Mastacembelidae	demersal	45.8	3.5
Mastacembelus paucispinis		Mastacembelidae	benthopelagic	47.2	3.5
Mastacembelus robertsi		Mastacembelidae	benthopelagic	41.2	3.6
Mastacembelus simbi		Mastacembelidae	benthopelagic	9.5
Mastacembelus stappersii		Mastacembelidae	benthopelagic	17.1	3.4
Mastacembelus traversi		Mastacembelidae	benthopelagic	43.5	3.6
Acanthocleithron chapini		Mochokidae	demersal	6.7	3
Atopochilus chabanaudi		Mochokidae	demersal	7.3	3
Atopochilus christyi		Mochokidae	demersal	11.6	3
Atopochilus macrocephalus		Mochokidae	demersal	9.1	3
Atopochilus mandevillei		Mochokidae	demersal	14.1	3
Atopochilus pachychilus		Mochokidae	demersal	8.5	3
Chiloglanis angolensis		Mochokidae	benthopelagic	6.8	3.2
Chiloglanis batesii		Mochokidae	benthopelagic	4.7	3.1
Chiloglanis carnosus		Mochokidae	benthopelagic	6.1	3.2
Chiloglanis congicus		Mochokidae	benthopelagic	7.5	3.2
Chiloglanis elisabethianus		Mochokidae	benthopelagic	5.2	3.1
Chiloglanis lufirae		Mochokidae	benthopelagic	12.2	3.2
Chiloglanis lukugae		Mochokidae	benthopelagic	11	3.2
Chiloglanis macropterus		Mochokidae	benthopelagic	9.8	3.2
Chiloglanis marlieri		Mochokidae	benthopelagic	5.6	3.1
Chiloglanis micropogon		Mochokidae	benthopelagic	4.9
Chiloglanis microps		Mochokidae	benthopelagic	6.8	3.2
Chiloglanis neumanni	Neumann's suckermouth	Mochokidae	benthopelagic	7.9	2.8
Chiloglanis pojeri		Mochokidae	benthopelagic	7	3.2
Chiloglanis reticulatus		Mochokidae	benthopelagic	5.1	3.1
Euchilichthys astatodon		Mochokidae	demersal	18.5	3
Euchilichthys boulengeri		Mochokidae	demersal	9.7	3
Euchilichthys dybowskii		Mochokidae	demersal	11.2	3
Euchilichthys guentheri		Mochokidae	demersal	19	3
Euchilichthys royauxi		Mochokidae	demersal	22	3
Microsynodontis batesii		Mochokidae	demersal	12.2	3
Microsynodontis christyi		Mochokidae	demersal	5.8
Microsynodontis lamberti		Mochokidae	demersal	4.3	3
Microsynodontis polli		Mochokidae	demersal	4.1	3
Synodontis acanthomias		Mochokidae	benthopelagic	59	2.8
Synodontis alberti	Bigeye squeaker	Mochokidae	benthopelagic	20.3	2.8
Synodontis angelicus	Angel squeaker	Mochokidae	benthopelagic	55	2.8
Synodontis aterrimus		Mochokidae	benthopelagic	11.5	2.9
Synodontis batesii		Mochokidae	benthopelagic	12.6	2.9
Synodontis brichardi		Mochokidae	benthopelagic	15	2
Synodontis camelopardalis		Mochokidae	benthopelagic	18	2.9
Synodontis caudalis		Mochokidae	benthopelagic	20.4	2.9
Synodontis centralis		Mochokidae	benthopelagic	13.5	2.9
Synodontis congicus		Mochokidae	benthopelagic	20.2	2.9
Synodontis contractus	Bugeye squeaker	Mochokidae	benthopelagic	9.7	2
Synodontis cuangoanus		Mochokidae	benthopelagic	26.8	2.9
Synodontis decorus	Clown squeaker	Mochokidae	benthopelagic	31.8	2.9
Synodontis depauwi		Mochokidae	benthopelagic	24	2.9
Synodontis dorsomaculatus		Mochokidae	benthopelagic	13.7	2.9
Synodontis flavitaeniatus	Orangestriped squeaker	Mochokidae	benthopelagic	19.5	2.9
Synodontis greshoffi		Mochokidae	benthopelagic	26.6	2.9
Synodontis iturii		Mochokidae	benthopelagic	20.5	2.9
Synodontis katangae		Mochokidae	benthopelagic	24	2.9
Synodontis longirostris		Mochokidae	benthopelagic	66	2.8
Synodontis longispinis		Mochokidae	benthopelagic	13.5	2.9
Synodontis lufirae		Mochokidae	benthopelagic	20.5	2.9
Synodontis macropunctatus		Mochokidae	demersal	27.9	2.9
Synodontis multimaculatus		Mochokidae	benthopelagic	7.8	2.9
Synodontis nigriventris	Blotched upsidedown catfish	Mochokidae	benthopelagic	9.6	2.9
Synodontis nigromaculatus	Blackspotted squeaker	Mochokidae	benthopelagic	38.5	3.1
Synodontis notatus	Onespot squeaker	Mochokidae	benthopelagic	26.5	2.9
Synodontis nummifer		Mochokidae	demersal	20.5	2.9
Synodontis ornatipinnis		Mochokidae	benthopelagic	40	2.9
Synodontis ornatissimus		Mochokidae	benthopelagic	21.1	2.9
Synodontis pardalis		Mochokidae	benthopelagic	23.5	2.9
Synodontis pleurops	Congo squeaker	Mochokidae	benthopelagic	32.5	2.9
Synodontis polystigma		Mochokidae	benthopelagic	24.5	2.9
Synodontis pulcher		Mochokidae	benthopelagic	15	2.9
Synodontis robertsi		Mochokidae	benthopelagic	10	2.9
Synodontis rukwaensis	Lake Rukwa squeaker	Mochokidae	benthopelagic	29	2.9
Synodontis schoutedeni		Mochokidae	benthopelagic	17.1	2.9
Synodontis smiti		Mochokidae	benthopelagic	22.2	2.9
Synodontis soloni		Mochokidae	benthopelagic	15.5	2.9
Synodontis unicolor		Mochokidae	benthopelagic	24.1	2.9
Synodontis vaillanti		Mochokidae	benthopelagic	58	2.8
Brienomyrus brachyistius		Mormyridae	benthopelagic	15.1	2.8
Brienomyrus tavernei		Mormyridae	benthopelagic	17	3
Campylomormyrus alces		Mormyridae	demersal	36	3.2
Campylomormyrus bredoi		Mormyridae	demersal	37	3.2
Campylomormyrus cassaicus		Mormyridae	demersal	20	3.2
Campylomormyrus christyi		Mormyridae	demersal	37.5	3.2
Campylomormyrus curvirostris		Mormyridae	demersal	40.5	3.2
Campylomormyrus elephas		Mormyridae	demersal	40	3.2
Campylomormyrus luapulaensis		Mormyridae	demersal	22	3.2
Campylomormyrus mirus		Mormyridae	demersal	47	3.2
Campylomormyrus numenius		Mormyridae	demersal	65	3.3
Campylomormyrus orycteropus		Mormyridae	demersal	32	3.2
Campylomormyrus rhynchophorus		Mormyridae	demersal	22	3.2
Campylomormyrus tamandua	Wormjawed mormyrid	Mormyridae	demersal	52.5	3.2
Campylomormyrus tshokwe		Mormyridae	demersal	29.5	3.2
Cyphomyrus discorhynchus	Zambesi parrotfish	Mormyridae	demersal	37.8	3.2
Genyomyrus donnyi		Mormyridae	demersal	45	3.2
Gnathonemus barbatus		Mormyridae	demersal	19.3	3.2
Gnathonemus echidnorhynchus		Mormyridae	demersal	13.4	3.1
Gnathonemus petersii	Elephantnose fish	Mormyridae	demersal	42.7	3.1
Hippopotamyrus aelsbroecki		Mormyridae	demersal	8.6	3.1
Hippopotamyrus ansorgii	Slender stonebasher	Mormyridae	demersal	18.3	3.2
Hippopotamyrus macrops		Mormyridae	demersal	23.2	3.2
Hippopotamyrus macroterops		Mormyridae	demersal	9.5	3.1
Hippopotamyrus psittacus		Mormyridae	demersal	30	3.2
Hippopotamyrus retrodorsalis		Mormyridae	demersal	13.9	3.1
Hippopotamyrus weeksii		Mormyridae	demersal	14	3.1
Hippopotamyrus wilverthi		Mormyridae	demersal	26	3.2
Marcusenius angolensis		Mormyridae	demersal	13.5	3
Marcusenius bentleyi		Mormyridae	demersal	27	3.1
Marcusenius cuangoanus		Mormyridae	demersal	11.4	3
Marcusenius dundoensis		Mormyridae	demersal	15	3
Marcusenius friteli		Mormyridae	demersal	13.5	3
Marcusenius fuscus		Mormyridae	demersal	24.3	3.1
Marcusenius ghesquierei		Mormyridae	demersal	13.3	3
Marcusenius greshoffii		Mormyridae	demersal	10.8	3
Marcusenius intermedius		Mormyridae	demersal	16.6	3
Marcusenius kutuensis		Mormyridae	demersal	23.8	3.1
Marcusenius leopoldianus		Mormyridae	demersal	27	3.1
Marcusenius macrolepidotus	Bulldog	Mormyridae	demersal	32	3.2
Marcusenius macrophthalmus		Mormyridae	demersal	15.3	3
Marcusenius monteiri	Monteiri's bulldog	Mormyridae	demersal	45	3.1
Marcusenius moorii		Mormyridae	demersal	26.1	3.1
Marcusenius schilthuisiae		Mormyridae	demersal	18.1	3
Marcusenius stanleyanus		Mormyridae	demersal	21	3.1
Mormyrops anguilloides	Cornish jack	Mormyridae	demersal	150	3.6
Mormyrops attenuatus		Mormyridae	demersal	22	3.2
Mormyrops batesianus		Mormyridae	demersal	28	3.2
Mormyrops curtus		Mormyridae	demersal	40	3.2
Mormyrops engystoma		Mormyridae	demersal	14.5	3.1
Mormyrops furcidens		Mormyridae	demersal	31.5	3.2
Mormyrops intermedius		Mormyridae	demersal	18.2	3.2
Mormyrops lineolatus		Mormyridae	demersal	40	3.2
Mormyrops mariae		Mormyridae	benthopelagic	17	3.2
Mormyrops masuianus		Mormyridae	demersal	41	3.2
Mormyrops microstoma		Mormyridae	demersal	16.5	3.2
Mormyrops nigricans		Mormyridae	demersal	34	3.2
Mormyrops parvus		Mormyridae	demersal	16.5	3.2
Mormyrops sirenoides		Mormyridae	demersal	63	3.3
Mormyrus caballus		Mormyridae	demersal	50	3.2
Mormyrus cyaneus		Mormyridae	demersal	26	3.1
Mormyrus iriodes		Mormyridae	demersal	27	3.1
Mormyrus longirostris	Eastern bottlenose mormyrid	Mormyridae	demersal	91.5	3.3
Mormyrus ovis		Mormyridae	demersal	29	3.1
Myomyrus macrodon		Mormyridae	demersal	24	3.2
Myomyrus macrops		Mormyridae	demersal	25	3.2
Myomyrus pharao		Mormyridae	demersal	36.1	3.2
Oxymormyrus boulengeri		Mormyridae	demersal	25	3.2
Oxymormyrus zanclirostris		Mormyridae	demersal	27	3.2
Paramormyrops kingsleyae		Mormyridae	benthopelagic	16.5	3
Paramormyrops sphekodes		Mormyridae	benthopelagic	13.9	3
Petrocephalus balayi		Mormyridae	demersal	11	3.1
Petrocephalus binotatus		Mormyridae	demersal	12.2	3.1
Petrocephalus catostoma	Churchill	Mormyridae	demersal	16.6	3.4
Petrocephalus christyi		Mormyridae	demersal	7.7	3.1
Petrocephalus congicus		Mormyridae	demersal	9	3.1
Petrocephalus frieli		Mormyridae	demersal	11.1
Petrocephalus grandoculis		Mormyridae	demersal	9.5	3.1
Petrocephalus haullevillii		Mormyridae	demersal	7	3.1
Petrocephalus hutereaui		Mormyridae	demersal	6	3.1
Petrocephalus longianalis		Mormyridae	demersal	14.5
Petrocephalus mbossou		Mormyridae	benthopelagic	15.5
Petrocephalus microphthalmus		Mormyridae	demersal	5.2	3.1
Petrocephalus odzalaensis		Mormyridae	benthopelagic	12.1
Petrocephalus pulsivertens		Mormyridae	benthopelagic	14
Petrocephalus sauvagii		Mormyridae	demersal	17.5	3.2
Petrocephalus simus		Mormyridae	demersal	12	3.1
Petrocephalus squalostoma		Mormyridae	demersal	14.9	3.1
Petrocephalus valentini		Mormyridae	benthopelagic	9.4
Petrocephalus zakoni		Mormyridae	benthopelagic	10.5
Pollimyrus adspersus		Mormyridae	demersal	10.5	3.2
Pollimyrus isidori	Elephant Fish	Mormyridae	demersal	11	2.6
Pollimyrus maculipinnis		Mormyridae	demersal	6.9	3.2
Pollimyrus nigripinnis		Mormyridae	demersal	11	3.2
Pollimyrus schreyeni		Mormyridae	demersal	9.3	3.2
Pollimyrus tumifrons		Mormyridae	demersal	11.2	3.2
Stomatorhinus ater		Mormyridae	demersal	11.2	3.1
Stomatorhinus humilior		Mormyridae	demersal	8	3.1
Stomatorhinus kununguensis		Mormyridae	demersal	8.6	3.1
Stomatorhinus microps		Mormyridae	demersal	9	3.1
Stomatorhinus patrizii		Mormyridae	demersal	6	3.1
Stomatorhinus puncticulatus		Mormyridae	demersal	8.7	3.1
Aphyosemion batesii	Bates' killi	Nothobranchiidae	benthopelagic	9	3.3
Aphyosemion bualanum		Nothobranchiidae	benthopelagic	5	3.2
Aphyosemion cameronense	Cameroon killi	Nothobranchiidae	benthopelagic	5	3.2
Aphyosemion castaneum		Nothobranchiidae	benthopelagic	4.2
Aphyosemion chauchei		Nothobranchiidae	benthopelagic	5	3.2
Aphyosemion christyi	Christy's Lyretail	Nothobranchiidae	benthopelagic	6	3.2
Aphyosemion cognatum	Redspot panchax	Nothobranchiidae	benthopelagic	5	3.2
Aphyosemion congicum	Congo killi	Nothobranchiidae	benthopelagic	4.5	3.2
Aphyosemion decorsei		Nothobranchiidae	benthopelagic	5	3.2
Aphyosemion elberti	Red barred killi	Nothobranchiidae	benthopelagic	4	3.1
Aphyosemion elegans	Elegant killi	Nothobranchiidae	benthopelagic	5	3.2
Aphyosemion exiguum	Jewel killi	Nothobranchiidae	benthopelagic	4	3.1
Aphyosemion ferranti		Nothobranchiidae	benthopelagic	5	3.2
Aphyosemion labarrei		Nothobranchiidae	benthopelagic	5	3.2
Aphyosemion lefiniense		Nothobranchiidae	benthopelagic	5	3.2
Aphyosemion lujae		Nothobranchiidae	benthopelagic	5	3.2
Aphyosemion musafirii		Nothobranchiidae	pelagic	5.2
Aphyosemion ogoense		Nothobranchiidae	benthopelagic	5	3.2
Aphyosemion plagitaenium		Nothobranchiidae	pelagic	4.8
Aphyosemion polli		Nothobranchiidae	benthopelagic	5	3.2
Aphyosemion pseudoelegans		Nothobranchiidae	pelagic	4.5
Aphyosemion punctatum		Nothobranchiidae	benthopelagic	5	3.2
Aphyosemion schioetzi		Nothobranchiidae	benthopelagic	5	3.2
Aphyosemion teugelsi		Nothobranchiidae	benthopelagic	5.2
Aphyosemion wildekampi		Nothobranchiidae	benthopelagic	5	3.2
Epiplatys atratus		Nothobranchiidae	pelagic	5.2
Epiplatys chevalieri		Nothobranchiidae	benthopelagic	6	3.2
Epiplatys duboisi	Dubois' Panchax	Nothobranchiidae	benthopelagic	3.5	3.1
Epiplatys mesogramma		Nothobranchiidae	benthopelagic	6	3.2
Epiplatys multifasciatus		Nothobranchiidae	benthopelagic	6	3.2
Epiplatys neumanni		Nothobranchiidae	benthopelagic	6	3.2
Epiplatys phoeniceps		Nothobranchiidae	benthopelagic	6	3.2
Epiplatys sangmelinensis		Nothobranchiidae	benthopelagic	6	3.2
Epiplatys singa		Nothobranchiidae	benthopelagic	6	3.2
Epiplatys spilargyreius		Nothobranchiidae	benthopelagic	5	3.1
Fenerbahce devosi		Nothobranchiidae	benthopelagic	3.2
Fenerbahce formosus	Starhead killi	Nothobranchiidae	benthopelagic	4	3.1
Nothobranchius brieni		Nothobranchiidae	benthopelagic	6	3.2
Nothobranchius hassoni		Nothobranchiidae	benthopelagic	5.1	3.2
Nothobranchius malaissei		Nothobranchiidae	benthopelagic	5.5	3.2
Nothobranchius polli		Nothobranchiidae	benthopelagic	6	3.2
Nothobranchius rosenstocki		Nothobranchiidae	pelagic	4.5	3.2
Nothobranchius symoensi		Nothobranchiidae	benthopelagic	5	3.2
Papyrocranus afer	Reticulate knifefish	Notopteridae	demersal	80	3.6
Papyrocranus congoensis		Notopteridae	demersal	26.1	3.4
Xenomystus nigri	African knifefish	Notopteridae	demersal	36.6	3.3
Myrophis plumbeus	Leaden worm eel	Ophichthidae	demersal	46.5	3.9
Pantodon buchholzi	Freshwater butterflyfish	Pantodontidae	pelagic	11.9	3.6
Phractolaemus ansorgii	Hingemouth	Phractolaemidae	benthopelagic	25	2.4
Aplocheilichthys brichardi	Brichard's lampeye	Poeciliidae	benthopelagic	3	3.1
Aplocheilichthys hutereaui	Meshscaled topminnow	Poeciliidae	benthopelagic	3.5	3.2
Aplocheilichthys johnstoni	Johnston's topminnow	Poeciliidae	benthopelagic	8.5	3.2
Aplocheilichthys katangae	Striped topminnow	Poeciliidae	benthopelagic	4.5	3.3
Aplocheilichthys lualabaensis	Lualaba lampeye	Poeciliidae	benthopelagic	4	3.2
Aplocheilichthys macrurus	Big tailed lampeye	Poeciliidae	benthopelagic	5	3.3
Aplocheilichthys moeruensis	Moero lampeye	Poeciliidae	benthopelagic	4	3.2
Aplocheilichthys myersi	Hummingbird lampeye	Poeciliidae	benthopelagic	2.3	3
Aplocheilichthys pumilus	Tanganyika lampeye	Poeciliidae	benthopelagic	5.5	3.3
Aplocheilichthys spilauchen	Banded lampeye	Poeciliidae	benthopelagic	7	3.4
Hylopanchax leki		Poeciliidae	pelagic	3.5
Hylopanchax moke		Poeciliidae	pelagic	2.6
Hylopanchax ndeko		Poeciliidae	pelagic	3.7
Hylopanchax silvestris		Poeciliidae	benthopelagic	4.9	3.2
Hylopanchax stictopleuron	Blue lampeye	Poeciliidae	benthopelagic	3.5	3.2
Hypsopanchax jobaerti		Poeciliidae	benthopelagic	4.5	3.1
Hypsopanchax jubbi	Southern deepbody	Poeciliidae	benthopelagic	5	3.1
Hypsopanchax platysternus	Zaire lampeye	Poeciliidae	benthopelagic	5.5	3.1
Hypsopanchax zebra	Zebra lampeye	Poeciliidae	benthopelagic	5.5	3.1
Lacustricola mediolateralis		Poeciliidae	benthopelagic	5	3.3
Lacustricola nigrolateralis		Poeciliidae	benthopelagic	4	3.2
Micropanchax camerunensis	Cameroon lampeye	Poeciliidae	benthopelagic	3	3.1
Micropanchax loati	Nile killifish	Poeciliidae	benthopelagic	4	3.2
Plataplochilus loemensis	Loeme lampeye	Poeciliidae	benthopelagic	6	3.2
Platypanchax modestus	Ruwenzori lampeye	Poeciliidae	benthopelagic	6	3.2
Poecilia reticulata	Guppy	Poeciliidae	benthopelagic	7.3	3.2
Polypterus congicus		Polypteridae	demersal	97	3.3
Polypterus delhezi	Barred bichir	Polypteridae	demersal	44	3.2
Polypterus mokelembembe		Polypteridae	demersal	28.7	3.3
Polypterus ornatipinnis	Ornate bichir	Polypteridae	demersal	60	3.7
Polypterus palmas	Shortfin bichir	Polypteridae	demersal	43.1	2.9
Polypterus polli		Polypteridae	demersal	39.2	3.2
Polypterus retropinnis	West African bichir	Polypteridae	demersal	41.5	2.6
Polypterus senegalus	Gray bichir	Polypteridae	demersal	85.4	3.5
Polypterus weeksii	Mottled bichir	Polypteridae	demersal	54	3.4
Protopterus dolloi	Slender lungfish	Protopteridae	demersal	130	3.2
Parailia congica		Schilbeidae	demersal	10	3.2
Parailia occidentalis		Schilbeidae	demersal	8.5	3.3
Pareutropius debauwi	African glass catfish	Schilbeidae	demersal	12.7	3.3
Pareutropius mandevillei		Schilbeidae	demersal	5.8	3.2
Schilbe banguelensis	Golden barbel	Schilbeidae	demersal	59	3.5
Schilbe brevianalis		Schilbeidae	demersal	10	3.2
Schilbe congensis		Schilbeidae	demersal	45	3.4
Schilbe durinii		Schilbeidae	demersal	7.9	3.2
Schilbe grenfelli		Schilbeidae	demersal	61	3.5
Schilbe intermedius	Silver catfish	Schilbeidae	pelagic	60.5	3.6
Schilbe laticeps		Schilbeidae	demersal	23	3.3
Schilbe marmoratus	Shoulderspot catfish	Schilbeidae	demersal	26.5	3.3
Schilbe multitaeniatus		Schilbeidae	demersal	32.1	3.4
Schilbe tumbanus		Schilbeidae	demersal	36	3.4
Schilbe yangambianus	Yangambi butterbarbel	Schilbeidae	demersal	25	2.9
Schilbe zairensis		Schilbeidae	benthopelagic	13.5	3.3
Enneacampus kaupi		Syngnathidae	demersal	20	2.7
Microphis aculeatus		Syngnathidae	demersal	24.4	3.4
Tetraodon mbu	Fresh water puffer fish	Tetraodontidae	demersal	67	3.6
			Means	20.5373	3.05703

## Sheet: Table 6
Data from FishBase (version (06/2014). www.fishbase.org
Atlantic
Species	Name	Family	Habitat	Length (cm)	Trophic Level
Acanthurus bahianus	Ocean surgeon	Acanthuridae	reef-associated	46.5	2
Acanthurus chirurgus	Doctorfish	Acanthuridae	reef-associated	39	2
Acanthurus coeruleus	Blue tang surgeonfish	Acanthuridae	reef-associated	39	2
Acanthurus dussumieri	Eyestripe surgeonfish	Acanthuridae	reef-associated	54	2
Acanthurus monroviae	Monrovia doctorfish	Acanthuridae	demersal	54.9	2.5
Acanthurus randalli	Gulf surgeonfish	Acanthuridae	reef-associated	18	2
Acanthurus triostegus	Convict surgeonfish	Acanthuridae	reef-associated	27	2.8
Prionurus biafraensis	Biafra doctorfish	Acanthuridae	demersal	20	2.3
Achirus achirus	Drab sole	Achiridae	demersal	37	4
Achirus declivis	Plainfin sole	Achiridae	demersal	18	3.4
Achirus lineatus	Lined sole	Achiridae	reef-associated	23	3.7
Gymnachirus melas	North American naked sole	Achiridae	demersal	22	3.4
Gymnachirus nudus	Naked sole	Achiridae	demersal	15	3.3
Gymnachirus texae	Gulf of Mexico fringed sole	Achiridae	demersal	14	3.3
Trinectes inscriptus	Scrawled sole	Achiridae	demersal	15	3.5
Trinectes maculatus	Hogchoker	Achiridae	demersal	20	3
Trinectes paulistanus	Slipper sole	Achiridae	demersal	15.4	3.3
Achiropsetta tricholepis	Prickly flounder	Achiropsettidae	demersal	39	3.4
Mancopsetta maculata	Antarctic armless flounder	Achiropsettidae	demersal	61	3.7
Neoachiropsetta milfordi	Finless flounder	Achiropsettidae	bathydemersal	69.5	3.9
Acipenser baerii	Siberian sturgeon	Acipenseridae	demersal	200	3.2
Acipenser brevirostrum	Shortnose sturgeon	Acipenseridae	demersal	143	3.3
Acipenser gueldenstaedtii	Danube sturgeon	Acipenseridae	demersal	236	3.1
Acipenser oxyrinchus	Atlantic sturgeon	Acipenseridae	demersal	430	3.4
Acipenser ruthenus	Sterlet sturgeon	Acipenseridae	demersal	125	3.6
Acipenser sturio	Sturgeon	Acipenseridae	demersal	600	3.5
Neoscombrops atlanticus		Acropomatidae	pelagic-oceanic	16.4	3.6
Synagrops bellus	Blackmouth bass	Acropomatidae	bathydemersal	28.1	3.7
Synagrops microlepis	Thinlip splitfin	Acropomatidae	bathypelagic	20.1	3.2
Synagrops spinosus	Keelcheek bass	Acropomatidae	bathydemersal	13	3.5
Synagrops trispinosus	Threespine bass	Acropomatidae	bathydemersal	11.5	3.4
Verilus sordidus		Acropomatidae	demersal	30	3.8
Agonopsis chiloensis	Snailfish	Agonidae	demersal	15.3	3.2
Agonus cataphractus	Hooknose	Agonidae	demersal	21	3.4
Aspidophoroides monopterygius	Alligatorfish	Agonidae	demersal	18	3
Aspidophoroides olrikii	Arctic alligatorfish	Agonidae	demersal	8.6	3.3
Leptagonus decagonus	Atlantic poacher	Agonidae	demersal	21	3.2
Albula nemoptera	Threadfin bonefish	Albulidae	demersal	51	3.5
Albula vulpes	Bonefish	Albulidae	reef-associated	104	3.7
Pterothrissus belloci	Longfin bonefish	Albulidae	bathydemersal	48.8	3
Alepisaurus brevirostris	Short snouted lancetfish	Alepisauridae	bathypelagic	96	3.8
Alepisaurus ferox	Long snouted lancetfish	Alepisauridae	bathypelagic	215	4.1
Alepocephalus agassizii	Agassiz' slickhead	Alepocephalidae	bathydemersal	96.4	3.4
Alepocephalus australis	Small scaled brown slickhead	Alepocephalidae	bathydemersal	73.2	3.5
Alepocephalus bairdii	Baird's slickhead	Alepocephalidae	bathydemersal	122	3.7
Alepocephalus productus	Smalleye smooth-head	Alepocephalidae	bathydemersal	50	3.5
Alepocephalus rostratus	Risso's smooth-head	Alepocephalidae	bathydemersal	61	3.5
Asquamiceps caeruleus		Alepocephalidae	bathypelagic	41.1	3.4
Asquamiceps hjorti	Barethroat slickhead	Alepocephalidae	bathypelagic	30.9	3.3
Asquamiceps velaris	Fanfin smooth-head	Alepocephalidae	bathypelagic	21.2	3.3
Bajacalifornia arcylepis	Network slickhead	Alepocephalidae	bathypelagic	26.4	3.3
Bajacalifornia megalops	Bigeye smooth-head	Alepocephalidae	bathypelagic	48.8	3.4
Bathylaco nielseni		Alepocephalidae	bathypelagic	35.5	3.3
Bathylaco nigricans	Black warrior	Alepocephalidae	bathypelagic	41.5	3.4
Bathyprion danae	Fangtooth smooth-head	Alepocephalidae	bathypelagic	46.4	3.4
Bathytroctes macrolepis	Koefoed's smooth-head	Alepocephalidae	bathypelagic	48.8	3.4
Bathytroctes michaelsarsi	Michael Sars smooth-head	Alepocephalidae	bathypelagic	45.1	3.4
Bathytroctes microlepis	Smallscale smooth-head	Alepocephalidae	bathypelagic	39.4	3.4
Bathytroctes oligolepis		Alepocephalidae	bathypelagic	39.4	3.4
Bathytroctes squamosus	Deepscale slickhead	Alepocephalidae	bathypelagic	37.3	3.3
Conocara fiolenti	Fiolenti's smooth-head	Alepocephalidae	bathypelagic	45.4	3.4
Conocara macropterum	Longfin smooth-head	Alepocephalidae	bathypelagic	41.5	3.4
Conocara microlepis	Elongate smooth-head	Alepocephalidae	bathypelagic	32.9	3.3
Conocara murrayi	Murray's smooth-head	Alepocephalidae	bathypelagic	41.5	3.4
Conocara salmoneum	Salmon smooth-head	Alepocephalidae	bathypelagic	89.1	3.5
Conocara werneri	Werner's smooth-head	Alepocephalidae	bathypelagic	41.5	3.4
Einara edentula	Toothless smooth-head	Alepocephalidae	bathypelagic	24.8	3.3
Einara macrolepis	Loosescale smooth-head	Alepocephalidae	bathypelagic	26.8	3.3
Herwigia kreffti	Krefft's smooth-head	Alepocephalidae	bathypelagic	48.8	3.4
Leptoderma macrops	Grenadier smooth-head	Alepocephalidae	bathydemersal	29.3	3.3
Mirognathus normani	Norman's smooth-head	Alepocephalidae	bathypelagic	24.4	3.3
Narcetes erimelas		Alepocephalidae	bathypelagic	35.5	3.3
Narcetes stomias	Blackhead salmon	Alepocephalidae	bathypelagic	70.2	3.4
Photostylus pycnopterus	Starry smooth-head	Alepocephalidae	bathypelagic	13.4	3.2
Rinoctes nasutus	Abyssal smooth-head	Alepocephalidae	bathypelagic	23.2	3.2
Rouleina attrita	Softskin smooth-head	Alepocephalidae	bathypelagic	58.6	3.4
Rouleina maderensis	Madeiran smooth-head	Alepocephalidae	bathypelagic	39	3.3
Talismania antillarum	Antillean smooth-head	Alepocephalidae	bathypelagic	19.5	3.3
Talismania bussingi		Alepocephalidae	bathydemersal	22.7	3.3
Talismania homoptera	Hairfin smooth-head	Alepocephalidae	bathypelagic	35.4	3.3
Talismania longifilis	Longtail slickhead	Alepocephalidae	bathypelagic	56.5	3.4
Talismania mekistonema	Threadfin smooth-head	Alepocephalidae	bathypelagic	32.6	3.3
Xenodermichthys copei	Bluntsnout smooth-head	Alepocephalidae	bathypelagic	31	3.2
Alopias superciliosus	Bigeye thresher	Alopiidae	pelagic-oceanic	488	4.5
Alopias vulpinus	Thresher	Alopiidae	pelagic-oceanic	760	4.5
Ambassis natalensis	Slender glassy	Ambassidae	demersal	11	3.4
Ammodytes americanus	American sand lance	Ammodytidae	demersal	23.5	3.2
Ammodytes dubius	Northern sand lance	Ammodytidae	demersal	25	3.1
Ammodytes hexapterus	Pacific sand lance	Ammodytidae	benthopelagic	30	3.1
Ammodytes marinus	Lesser sand-eel	Ammodytidae	benthopelagic	25	2.7
Ammodytes tobianus	Small sandeel	Ammodytidae	demersal	24.4	3.1
Ammodytoides renniei	Scaly sandlance	Ammodytidae	reef-associated	7.3	3.1
Gymnammodytes capensis	Cape sandlance	Ammodytidae	demersal	17	3.1
Gymnammodytes cicerelus	Mediterranean sand eel	Ammodytidae	demersal	17	3.4
Gymnammodytes semisquamatus	Smooth sandeel	Ammodytidae	demersal	36.6	2.7
Hyperoplus immaculatus	Greater sand-eel	Ammodytidae	demersal	42.7	4.4
Hyperoplus lanceolatus	Great sandeel	Ammodytidae	demersal	48.8	4.2
Anableps dowei	Pacific foureyed fish	Anablepidae	demersal	34	2.8
Anarhichas denticulatus	Northern wolffish	Anarhichadidae	benthopelagic	180	3.8
Anarhichas lupus	Atlantic wolffish	Anarhichadidae	demersal	150	3.2
Anarhichas minor	Spotted wolffish	Anarhichadidae	demersal	180	3.5
Anguilla anguilla	European eel	Anguillidae	demersal	133	3.5
Anguilla mossambica	African longfin eel	Anguillidae	demersal	150	3.3
Anguilla rostrata	American eel	Anguillidae	demersal	152	3.7
Kryptophanaron alfredi	Atlantic flashlightfish	Anomalopidae	reef-associated	12.5	3.4
Anoplogaster brachycera	Shorthorn fangtooth	Anoplogastridae	bathypelagic	7.3	3.3
Anoplogaster cornuta	Common fangtooth	Anoplogastridae	bathypelagic	18	4
Anotopterus pharao	Daggertooth	Anotopteridae	bathypelagic	117.1	4.3
Antennarius hispidus	Shaggy angler	Antennariidae	reef-associated	20	4.2
Antennarius multiocellatus	Longlure frogfish	Antennariidae	reef-associated	20	4.3
Antennarius pardalis		Antennariidae	reef-associated	12.4	4
Antennarius pauciradiatus	Dwarf frogfish	Antennariidae	reef-associated	6.3	3.6
Antennarius striatus	Striated frogfish	Antennariidae	reef-associated	25	4.2
Antennatus bermudensis	Island frogfish	Antennariidae	reef-associated	9.3	3.8
Antennatus coccineus	Scarlet frogfish	Antennariidae	reef-associated	13	4.2
Antennatus nummifer	Spotfin frogfish	Antennariidae	reef-associated	13	4.2
Fowlerichthys ocellatus	Ocellated frogfish	Antennariidae	reef-associated	38	4.1
Fowlerichthys radiosus	Singlespot frogfish	Antennariidae	demersal	7.6	3.7
Fowlerichthys senegalensis	Senegalese frogfish	Antennariidae	demersal	34.8	4.2
Histrio histrio	Sargassumfish	Antennariidae	reef-associated	20	3.9
Aphyonus gelatinosus	Gelatinous blindfish	Aphyonidae	bathydemersal	18.3	3.5
Aphyonus rassi		Aphyonidae	bathydemersal	6	3.2
Barathronus bicolor		Aphyonidae	bathypelagic	14.1	3.4
Barathronus multidens		Aphyonidae	bathypelagic	14.1	3.4
Barathronus parfaiti		Aphyonidae	bathypelagic	12.2	3.4
Barathronus unicolor		Aphyonidae	bathypelagic	14.1	3.4
Meteoria erythrops		Aphyonidae	bathydemersal	9.1	3.3
Nybelinella erikssoni		Aphyonidae	bathydemersal	8	3.3
Sciadonus cryptophthalmus		Aphyonidae	bathydemersal	10	3.3
Sciadonus galatheae		Aphyonidae	bathydemersal	11.4	3.4
Sciadonus jonassoni		Aphyonidae	bathydemersal	10.7	3.3
Sciadonus pedicellaris		Aphyonidae	bathydemersal	10.7	3.3
Apogon affinis	Bigtooth cardinalfish	Apogonidae	reef-associated	11	3.5
Apogon americanus	Brazilian flamefish	Apogonidae	demersal	12.3	3.4
Apogon aurolineatus	Bridle cardinalfish	Apogonidae	reef-associated	6.5	3.4
Apogon axillaris	Axillary-spot cardinalfish	Apogonidae	demersal	15	3.6
Apogon binotatus	Barred cardinalfish	Apogonidae	reef-associated	15.9	3.4
Apogon imberbis	Cardinal fish	Apogonidae	reef-associated	18.3	3.9
Apogon lachneri	Whitestar cardinalfish	Apogonidae	reef-associated	6.5	3.4
Apogon leptocaulus	Slendertail cardinalfish	Apogonidae	reef-associated	6	3.3
Apogon maculatus	Flamefish	Apogonidae	reef-associated	11.1	3.5
Apogon mosavi	Dwarf cardinalfish	Apogonidae	benthopelagic	9.5	3.5
Apogon phenax	Mimic cardinalfish	Apogonidae	reef-associated	7.5	3.4
Apogon pillionatus	Broadsaddle cardinalfish	Apogonidae	reef-associated	6.5	3.4
Apogon planifrons	Pale cardinalfish	Apogonidae	reef-associated	12.8	3.6
Apogon pseudomaculatus	Twospot cardinalfish	Apogonidae	reef-associated	11	3.4
Apogon quadrisquamatus	Sawcheek cardinalfish	Apogonidae	reef-associated	7	3.4
Apogon robbyi	Striped cardinalfish	Apogonidae	demersal	4.4	3.2
Apogon robinsi	Roughlip cardinalfish	Apogonidae	reef-associated	12.3	3.6
Apogon townsendi	Belted cardinalfish	Apogonidae	reef-associated	7.9	3.4
Apogonichthys ocellatus	Ocellated cardinalfish	Apogonidae	reef-associated	6	3.3
Astrapogon alutus	Bronze cardinalfish	Apogonidae	reef-associated	6.5	3.4
Astrapogon puncticulatus	Blackfin cardinalfish	Apogonidae	reef-associated	9.8	3.5
Astrapogon stellatus	Conchfish	Apogonidae	reef-associated	9.8	3.5
Phaeoptyx conklini	Freckled cardinalfish	Apogonidae	reef-associated	11	3.5
Phaeoptyx pigmentaria	Dusky cardinalfish	Apogonidae	reef-associated	9.8	3.5
Phaeoptyx xenus	Sponge cardinalfish	Apogonidae	reef-associated	7.5	3.4
Pristiapogon kallopterus	Iridescent cardinalfish	Apogonidae	reef-associated	15.5	3.5
Zapogon evermanni	Evermann's cardinalfish	Apogonidae	reef-associated	14.6	3.6
Argentina brucei	Bruce's argentine	Argentinidae	bathypelagic	15	3.3
Argentina georgei		Argentinidae	bathydemersal	17.8	3.3
Argentina silus	Greater argentine	Argentinidae	bathydemersal	85.4	3.3
Argentina sphyraena	Argentine	Argentinidae	bathydemersal	42.7	3.6
Argentina striata	Striated argentine	Argentinidae	bathypelagic	24	3.4
Glossanodon leioglossus	Smalltoothed argentine	Argentinidae	bathydemersal	20	3.5
Glossanodon polli		Argentinidae	demersal	17.1	3.1
Glossanodon pygmaeus	Pygmy argentine	Argentinidae	bathypelagic	13.7	3
Amphiarius phrygiatus	Kukwari sea catfish	Ariidae	demersal	30	3.5
Amphiarius rugispinis	Softhead sea catfish	Ariidae	demersal	45	3.6
Ariopsis assimilis	Mayan sea catfish	Ariidae	demersal	35	3.6
Ariopsis felis	Hardhead sea catfish	Ariidae	reef-associated	70	3.3
Arius latiscutatus	Rough-head sea catfish	Ariidae	demersal	85	3.3
Arius parkii	Guinean sea catfish	Ariidae	demersal	75	4.1
Aspistor quadriscutis	Bressou sea catfish	Ariidae	benthopelagic	50	3.5
Bagre bagre	Coco sea catfish	Ariidae	demersal	55	4
Bagre marinus	Gafftopsail sea catfish	Ariidae	demersal	69	3.3
Carlarius heudelotii	Smoothmouth sea catfish	Ariidae	demersal	83	3.8
Cathorops spixii	Madamango sea catfish	Ariidae	demersal	30	3.2
Galeichthys ater	Black seacatfish	Ariidae	reef-associated	45	3.6
Galeichthys feliceps	White barbel	Ariidae	demersal	55	3.5
Genidens barbus	White sea catfish	Ariidae	demersal	120	3.6
Genidens genidens	Guri sea catfish	Ariidae	demersal	35	3.5
Genidens planifrons		Ariidae	demersal	69.5	3.7
Notarius grandicassis	Thomas sea catfish	Ariidae	demersal	63	3.6
Sciades couma	Couma sea catfish	Ariidae	demersal	97	3.4
Sciades herzbergii	Pemecou sea catfish	Ariidae	demersal	94.2	3.3
Sciades parkeri	Gillbacker sea catfish	Ariidae	demersal	190	4.1
Sciades passany	Passany sea catfish	Ariidae	demersal	100	3.8
Sciades proops	Crucifix sea catfish	Ariidae	demersal	100	4.3
Ariomma bondi	Silver-rag driftfish	Ariommatidae	demersal	30	3.5
Ariomma indicum	Indian driftfish	Ariommatidae	benthopelagic	30.5	3.6
Ariomma melanum	Brown driftfish	Ariommatidae	bathydemersal	30	3.5
Ariomma regulus	Spotted driftfish	Ariommatidae	demersal	25	3.4
Artedidraco lonnbergi		Artedidraconidae	bathydemersal	11	3.2
Artedidraco mirus		Artedidraconidae	demersal	12.5	3.2
Artedidraco orianae		Artedidraconidae	demersal	15.1	3.2
Artedidraco shackletoni		Artedidraconidae	demersal	14.6	3.2
Artedidraco skottsbergi		Artedidraconidae	demersal	12.2	3.2
Dolloidraco longedorsalis		Artedidraconidae	bathydemersal	13.7	3.2
Histiodraco velifer		Artedidraconidae	bathydemersal	19.2	3.2
Pogonophryne barsukovi	Stubbeard plunderfish	Artedidraconidae	bathydemersal	25	3.3
Pogonophryne dewitti	DeWitt’s plunderfish	Artedidraconidae	bathydemersal	6.7	3.2
Pogonophryne immaculata	Spotless plunderfish	Artedidraconidae	demersal	25	3.3
Pogonophryne lanceobarbata	Lancebeard plunderfish	Artedidraconidae	bathydemersal	25	3.3
Pogonophryne macropogon	Greatbeard plunderfish	Artedidraconidae	bathydemersal	34	3.3
Pogonophryne marmorata	Marbled plunderfish	Artedidraconidae	demersal	21	3.3
Pogonophryne orangiensis	Orangebeard plunderfish	Artedidraconidae	bathydemersal	20	3.3
Pogonophryne permitini	Finespotted plunderfish	Artedidraconidae	bathydemersal	21	3.3
Pogonophryne platypogon	Flatbeard plunderfish	Artedidraconidae	demersal	8.1	3.2
Pogonophryne scotti	Saddleback plunderfish	Artedidraconidae	bathydemersal	31	3.5
Pogonophryne ventrimaculata	Spotbelly plunderfish	Artedidraconidae	bathydemersal	26	3.3
Aspredinichthys filamentosus	Sevenbarbed banjo	Aspredinidae	demersal	26.6	3.2
Aspredinichthys tibicen	Tenbarbed banjo	Aspredinidae	demersal	25.6	3.2
Aspredo aspredo	Banjo	Aspredinidae	demersal	46.7	3.3
Platystacus cotylephorus	Banded banjo	Aspredinidae	demersal	38.8	3.2
Ateleopus natalensis	Jelly-head fish	Ateleopodidae	benthopelagic	60	4
Guentherus altivela	Jellynose	Ateleopodidae	bathydemersal	200	3.5
Ijimaia antillarum		Ateleopodidae	demersal	158.5	4.2
Ijimaia loppei	Loppe's tadpole fish	Ateleopodidae	bathydemersal	200	4.3
Atherina boyeri	Big-scale sand smelt	Atherinidae	demersal	20	2.3
Atherina breviceps	Cape silverside	Atherinidae	pelagic-neritic	13.4	3.3
Atherina hepsetus	Mediterranean sand smelt	Atherinidae	pelagic-neritic	20	3.2
Atherina lopeziana		Atherinidae	pelagic-neritic	9.8	3.2
Atherina presbyter	Sand smelt	Atherinidae	pelagic-neritic	20	3.7
Atherinomorus stipes	Hardhead silverside	Atherinidae	reef-associated	10	3.4
Atherion africanum	Pricklenose silverside	Atherinidae	pelagic-neritic	5.5	3.1
Hypoatherina harringtonensis	Reef silverside	Atherinidae	reef-associated	10	3
Atherinella beani		Atherinopsidae	pelagic-neritic	10.7	2.7
Atherinella blackburni	Beach silverside	Atherinopsidae	benthopelagic	13	3.4
Atherinella brasiliensis	Brazilian silversides	Atherinopsidae	benthopelagic	16	2.5
Atherinella chagresi		Atherinopsidae	benthopelagic	9	2.7
Atherinella milleri		Atherinopsidae	pelagic-neritic	5.5	2.8
Melanorhinus boekei	St. Maarten pejerry	Atherinopsidae	pelagic-neritic	8.8	3.1
Melanorhinus microps	Querimana silverside	Atherinopsidae	pelagic-oceanic	7.5	3.1
Membras analis	Backwaters silverside	Atherinopsidae	pelagic-neritic	12	3.4
Membras martinica	Rough silverside	Atherinopsidae	pelagic-neritic	12.5	3
Membras vagrans		Atherinopsidae	pelagic-neritic	14.8	3.3
Menidia beryllina	Inland silverside	Atherinopsidae	pelagic-neritic	15	3.1
Menidia conchorum	Key silverside	Atherinopsidae	pelagic-neritic	5	3.1
Menidia menidia	Atlantic silverside	Atherinopsidae	pelagic-neritic	15	3.2
Menidia peninsulae	Tidewater silverside	Atherinopsidae	pelagic-neritic	15	3.2
Odontesthes argentinensis		Atherinopsidae	pelagic-neritic	42.1	3.3
Odontesthes bonariensis	Argentinian silverside	Atherinopsidae	pelagic-neritic	50	2.6
Odontesthes incisa		Atherinopsidae	demersal	10	3.3
Odontesthes nigricans		Atherinopsidae	pelagic-neritic	26.7	3.3
Odontesthes platensis		Atherinopsidae	benthopelagic	26.7	3.3
Aulopus cadenati	Guinean flagfin	Aulopidae	demersal	48.8	4.2
Aulopus filamentosus	Royal flagfin	Aulopidae	demersal	53.7	4.2
Aulostomus chinensis	Chinese trumpetfish	Aulostomidae	reef-associated	80	4.2
Aulostomus maculatus	Trumpetfish	Aulostomidae	reef-associated	100	4.3
Aulostomus strigosus	Atlantic cornetfish	Aulostomidae	demersal	75	4.2
Abalistes stellaris	Starry triggerfish	Balistidae	demersal	60	3.5
Balistes capriscus	Grey triggerfish	Balistidae	reef-associated	60	3.5
Balistes punctatus	Bluespotted triggerfish	Balistidae	demersal	60	3.4
Balistes vetula	Queen triggerfish	Balistidae	reef-associated	60	3.4
Canthidermis maculata	Rough triggerfish	Balistidae	reef-associated	50	3.5
Canthidermis sufflamen	Ocean triggerfish	Balistidae	reef-associated	65	3.2
Melichthys niger	Black triggerfish	Balistidae	reef-associated	50	2.4
Rhinecanthus aculeatus	White-banded triggerfish	Balistidae	reef-associated	30	3.3
Rhinecanthus rectangulus	Wedge-tail triggerfish	Balistidae	reef-associated	30	3.1
Sufflamen chrysopterum	Halfmoon triggerfish	Balistidae	reef-associated	30	3.5
Xanthichthys lineopunctatus	Striped triggerfish	Balistidae	reef-associated	30	3.1
Xanthichthys ringens	Sargassum triggerfish	Balistidae	reef-associated	25	3.1
Barbourisia rufa	Velvet whalefish	Barbourisiidae	bathydemersal	39	3.3
Bathyclupea argentea		Bathyclupeidae	bathypelagic	21.1	3.4
Bathyclupea elongata		Bathyclupeidae	pelagic-oceanic	17.8	3.4
Bathyclupea schroederi		Bathyclupeidae	benthopelagic	19.5	3.4
Acanthodraco dewitti		Bathydraconidae	bathydemersal	32.6	3.6
Akarotaxis nudiceps		Bathydraconidae	bathydemersal	15.9	3.4
Bathydraco antarcticus		Bathydraconidae	bathydemersal	29.3	3.6
Bathydraco joannae		Bathydraconidae	bathydemersal	24.4	3.5
Bathydraco macrolepis		Bathydraconidae	bathydemersal	30.5	3.6
Bathydraco marri	Deep-water dragon	Bathydraconidae	bathydemersal	28.1	3.6
Bathydraco scotiae		Bathydraconidae	demersal	20.7	3.5
Cygnodraco mawsoni	Mawson's dragonfish	Bathydraconidae	demersal	50	4.4
Gerlachea australis		Bathydraconidae	bathydemersal	29.3	3.3
Gymnodraco acuticeps	Ploughfish	Bathydraconidae	demersal	41.5	4.5
Parachaenichthys charcoti		Bathydraconidae	demersal	51.2	4.2
Parachaenichthys georgianus		Bathydraconidae	demersal	72	4
Prionodraco evansii		Bathydraconidae	demersal	18.3	3.3
Psilodraco breviceps		Bathydraconidae	demersal	24.4	3.2
Racovitzia glacialis		Bathydraconidae	bathydemersal	29.3	3
Vomeridens infuscipinnis		Bathydraconidae	bathydemersal	26.8	3.5
Bathylagichthys greyae	Grey's deepsea smelt	Bathylagidae	bathypelagic	19.5	3.4
Bathylagichthys problematicus		Bathylagidae	pelagic-oceanic	32.5	3.4
Bathylagoides argyrogaster	Silver deepsea smelt	Bathylagidae	bathypelagic	13.4	3.3
Bathylagus antarcticus	Antarctic deepsea smelt	Bathylagidae	bathypelagic	20.7	3.1
Bathylagus euryops	Goiter blacksmelt	Bathylagidae	bathypelagic	13	3.3
Bathylagus gracilis		Bathylagidae	bathypelagic	26.5	3.2
Bathylagus niger		Bathylagidae	bathypelagic	17.2	3.3
Bathylagus tenuis		Bathylagidae	bathypelagic	19.5	3.3
Dolicholagus longirostris	Longsnout blacksmelt	Bathylagidae	bathypelagic	21.4	3.4
Melanolagus bericoides	Bigscale deepsea smelt	Bathylagidae	bathypelagic	24.4	3.4
Bathylutichthys taranetzi		Bathylutichthyidae	bathydemersal	12.2	3.4
Bathysaurus ferox	Deep-sea lizardfish	Bathysauridae	bathydemersal	78.1	4.3
Bathysaurus mollis	Highfin lizardfish	Bathysauridae	bathydemersal	95.2	4.5
Amphichthys cryptocentrus	Bocon toadfish	Batrachoididae	reef-associated	40	3.8
Amphichthys rubigenis		Batrachoididae	demersal	40	3.8
Aphos porosus	Banded toadfish	Batrachoididae	demersal	28	3.7
Austrobatrachus foedus	Puzzled toadfish	Batrachoididae	demersal	27	3.7
Batrachoides gilberti	Large-eye toadfish	Batrachoididae	demersal	28.1	3.7
Batrachoides liberiensis	Hairy toadfish	Batrachoididae	demersal	46	3.7
Batrachoides manglae	Cotuero toadfish	Batrachoididae	demersal	30	3.4
Batrachoides surinamensis	Pacuma toadfish	Batrachoididae	demersal	57	3.7
Batrichthys albofasciatus	White-ribbed toadfish	Batrachoididae	demersal	12	3.5
Batrichthys apiatus	Snakehead toadfish	Batrachoididae	demersal	10	3.4
Chatrabus felinus	Pleated toadfish	Batrachoididae	demersal	19	3.3
Chatrabus hendersoni	Chocolate toadfish	Batrachoididae	demersal	22	3.6
Chatrabus melanurus	Pony toadfish	Batrachoididae	demersal	26	3.5
Halobatrachus didactylus	Lusitanian toadfish	Batrachoididae	demersal	50	4
Opsanus beta	Gulf toadfish	Batrachoididae	demersal	30	3.7
Opsanus pardus	Leopard toadfish	Batrachoididae	reef-associated	38	3.8
Opsanus phobetron	Scarecrow toadfish	Batrachoididae	demersal	21.5	3.6
Opsanus tau	Oyster toadfish	Batrachoididae	reef-associated	43.2	3.6
Perulibatrachus elminensis	Guinean toadfish	Batrachoididae	demersal	35	3.7
Perulibatrachus rossignoli	Rossignol toadfish	Batrachoididae	demersal	40	3.5
Porichthys bathoiketes		Batrachoididae	bathydemersal	19.2	3.8
Porichthys kymosemeum		Batrachoididae	demersal	25.4	4
Porichthys oculofrenum		Batrachoididae	demersal	25.4	4
Porichthys pauciradiatus		Batrachoididae	demersal	25.4	4
Porichthys plectrodon	Atlantic midshipman	Batrachoididae	demersal	29	4.4
Porichthys porosissimus		Batrachoididae	demersal	32	3.7
Riekertia ellisi	Broadbodied toadfish	Batrachoididae	demersal	29	3.7
Sanopus astrifer		Batrachoididae	reef-associated	32.5	3.7
Sanopus barbatus	Bearded toadfish	Batrachoididae	reef-associated	41	3.8
Sanopus greenfieldorum	Whitelined toadfish	Batrachoididae	demersal	32.5	3.7
Sanopus johnsoni	Cozumel toadfish	Batrachoididae	reef-associated	32.5	3.7
Sanopus reticulatus	Reticulate toadfish	Batrachoididae	demersal	32.5	3.7
Sanopus splendidus	Coral toadfish	Batrachoididae	reef-associated	24	3.6
Thalassophryne maculosa	Cano toadfish	Batrachoididae	reef-associated	20	3.6
Thalassophryne megalops		Batrachoididae	demersal	16.9	3.5
Thalassophryne montevidensis		Batrachoididae	demersal	16.9	3.5
Thalassophryne nattereri		Batrachoididae	demersal	17.1	3.5
Thalassophryne punctata		Batrachoididae	demersal	19.3	3.6
Triathalassothia argentina		Batrachoididae	demersal	26.7	3.7
Vladichthys gloverensis		Batrachoididae	reef-associated	6.8	3.3
Ablennes hians	Flat needlefish	Belonidae	reef-associated	140	4.5
Belone belone	Garfish	Belonidae	pelagic-oceanic	93	4.2
Belone svetovidovi		Belonidae	pelagic-oceanic	93	4.3
Petalichthys capensis	Cape needlefish	Belonidae	pelagic-oceanic	42.7	4.1
Platybelone argalus annobonensis	Annobon keel tail needlefish	Belonidae	pelagic-neritic	47.9	4.2
Platybelone argalus argalus	Keeltail needlefish	Belonidae	reef-associated	50	4.5
Platybelone argalus lovii		Belonidae	pelagic-oceanic	47.9	4.2
Platybelone argalus trachura		Belonidae	pelagic-neritic	47.9	4.2
Strongylura marina	Atlantic needlefish	Belonidae	reef-associated	111	3.8
Strongylura notata notata	Redfin needlefish	Belonidae	reef-associated	61	4.4
Strongylura senegalensis	Senegal needlefish	Belonidae	pelagic-neritic	183	4.5
Strongylura timucu	Timucu	Belonidae	reef-associated	61	4.5
Tylosurus acus acus	Agujon needlefish	Belonidae	reef-associated	153	4.5
Tylosurus acus imperialis		Belonidae	pelagic-oceanic	170.8	4.5
Tylosurus acus rafale	Atlantic agujon needlefish	Belonidae	pelagic-oceanic	140	4.1
Tylosurus crocodilus crocodilus	Hound needlefish	Belonidae	reef-associated	150	4.5
Beryx decadactylus	Alfonsino	Berycidae	bathydemersal	100	4.1
Beryx splendens	Splendid alfonsino	Berycidae	benthopelagic	70	4.4
Centroberyx spinosus	Short alfonsino	Berycidae	benthopelagic	20	3.7
Antennablennius australis	Moustached rockskipper	Blenniidae	demersal	8.5	2.1
Antennablennius bifilum	Horned rockskipper	Blenniidae	demersal	7.5	2.2
Aspidontus dussumieri	Lance blenny	Blenniidae	reef-associated	12	2
Bathyblennius antholops		Blenniidae	demersal	6.5	2.3
Blennius normani		Blenniidae	demersal	13.4	2
Blennius ocellaris	Butterfly blenny	Blenniidae	demersal	20	3.5
Chalaroderma capito	Looseskin blenny	Blenniidae	demersal	24.4	2
Chalaroderma ocellata	Two-eyed blenny	Blenniidae	demersal	8.5	2.1
Chasmodes bosquianus	Striped blenny	Blenniidae	demersal	15	2
Chasmodes saburrae	Florida blenny	Blenniidae	demersal	10	3.4
Coryphoblennius galerita	Montagu's blenny	Blenniidae	demersal	9.3	2.2
Entomacrodus cadenati	West African rockhopper	Blenniidae	demersal	8.4	2
Entomacrodus nigricans	Pearl blenny	Blenniidae	reef-associated	10	2
Entomacrodus textilis	Textile blenny	Blenniidae	reef-associated	7.3	2
Entomacrodus vomerinus		Blenniidae	demersal	9.6	2
Hirculops cornifer	Highbrow rockskipper	Blenniidae	demersal	7.3	2.2
Hypleurochilus aequipinnis	Oyster blenny	Blenniidae	reef-associated	7.5	3.2
Hypleurochilus bananensis		Blenniidae	demersal	12.8	3.2
Hypleurochilus bermudensis	Barred blenny	Blenniidae	reef-associated	10	3.2
Hypleurochilus fissicornis		Blenniidae	demersal	8.2	3.3
Hypleurochilus geminatus	Crested blenny	Blenniidae	reef-associated	10	3.2
Hypleurochilus langi		Blenniidae	demersal	8.5	3.2
Hypleurochilus springeri	Orangespotted blenny	Blenniidae	reef-associated	5	2.9
Hypsoblennius exstochilus	Longhorn blenny	Blenniidae	demersal	5	2.9
Hypsoblennius hentz	Feather blenny	Blenniidae	reef-associated	10	2.8
Hypsoblennius invemar	Tessellated blenny	Blenniidae	demersal	5.8	2.8
Hypsoblennius ionthas	Freckled blenny	Blenniidae	demersal	10	2.8
Istiblennius dussumieri	Streaky rockskipper	Blenniidae	reef-associated	12	2
Istiblennius edentulus	Rippled rockskipper	Blenniidae	reef-associated	16	2
Lipophrys pholis	Shanny	Blenniidae	demersal	30	3.1
Lipophrys trigloides		Blenniidae	demersal	13	3.5
Lupinoblennius nicholsi	Highfin blenny	Blenniidae	reef-associated	6	2.3
Lupinoblennius vinctus	Mangrove blenny	Blenniidae	reef-associated	5	2.6
Microlipophrys bauchotae		Blenniidae	demersal	4.3	2.9
Microlipophrys caboverdensis		Blenniidae	demersal	4	2.9
Microlipophrys canevae		Blenniidae	demersal	7.5	2.1
Microlipophrys dalmatinus		Blenniidae	demersal	4.1	3.2
Microlipophrys velifer		Blenniidae	demersal	5.8	2.8
Omobranchus banditus	Bandit blenny	Blenniidae	demersal	7.3	2.7
Omobranchus punctatus	Muzzled blenny	Blenniidae	benthopelagic	11.6	2.5
Omobranchus woodi	Kappie blenny	Blenniidae	demersal	9.8	2.6
Ophioblennius atlanticus		Blenniidae	reef-associated	19	2
Ophioblennius macclurei	Redlip blenny	Blenniidae	reef-associated	12.2	2.5
Parablennius cornutus		Blenniidae	demersal	18.3	2.2
Parablennius dialloi		Blenniidae	demersal	11.3	2.4
Parablennius gattorugine	Tompot blenny	Blenniidae	demersal	30	2.9
Parablennius goreensis		Blenniidae	demersal	8.5	2.5
Parablennius incognitus		Blenniidae	demersal	7.1	2.4
Parablennius marmoreus	Seaweed blenny	Blenniidae	reef-associated	8.5	2.5
Parablennius parvicornis	Rock-pool blenny	Blenniidae	demersal	14.6	2
Parablennius pilicornis	Ringneck blenny	Blenniidae	demersal	15.5	3.2
Parablennius rouxi		Blenniidae	demersal	8	2.6
Parablennius ruber	Portuguese blenny	Blenniidae	demersal	14.1	2.9
Parablennius salensis		Blenniidae	demersal	6	2.6
Parablennius sanguinolentus	Rusty blenny	Blenniidae	demersal	20	2.1
Parablennius sierraensis		Blenniidae	demersal	11.3	2.4
Parablennius tentacularis	Tentacled blenny	Blenniidae	demersal	15	3.1
Parablennius verryckeni		Blenniidae	demersal	4.9	2.7
Plagiotremus rhinorhynchos	Bluestriped fangblenny	Blenniidae	reef-associated	14.6	4.5
Plagiotremus tapeinosoma	Piano fangblenny	Blenniidae	reef-associated	14	3.8
Salaria pavo	Peacock blenny	Blenniidae	demersal	13	2.9
Scartella caboverdiana		Blenniidae	demersal	6	2.6
Scartella cristata	Molly miller	Blenniidae	reef-associated	12	2
Scartella emarginata	Maned blenny	Blenniidae	demersal	12.2	2.8
Scartella nuchifilis		Blenniidae	demersal	8	2.5
Scartella springeri		Blenniidae	demersal	10	2.5
Spaniblennius clandestinus		Blenniidae	demersal	6.2	2.3
Spaniblennius riodourensis		Blenniidae	demersal	6.2	2.3
Xiphasia matsubarai	Japanese snake blenny	Blenniidae	benthopelagic	36.6	2
Xiphasia setifer	Hairtail blenny	Blenniidae	benthopelagic	64.7	2
Arnoglossus capensis	Cape scaldfish	Bothidae	demersal	20	3.6
Arnoglossus imperialis	Imperial scaldfish	Bothidae	demersal	25	3.8
Arnoglossus laterna	Mediterranean scaldfish	Bothidae	demersal	30.5	3.6
Arnoglossus rueppelii	Rüppell's scaldback	Bothidae	demersal	18.3	4
Arnoglossus thori	Thor's scaldfish	Bothidae	demersal	22	3.3
Bothus guibei	Guinean flounder	Bothidae	demersal	28.6	3.9
Bothus lunatus	Plate fish	Bothidae	reef-associated	46	4.4
Bothus maculiferus	Mottled flounder	Bothidae	demersal	25	3.8
Bothus mellissi	St. Helena flounder	Bothidae	demersal	22.3	3.8
Bothus ocellatus	Eyed flounder	Bothidae	reef-associated	18	3.8
Bothus pantherinus	Leopard flounder	Bothidae	reef-associated	39	3.5
Bothus podas	Wide-eyed flounder	Bothidae	demersal	45	3.4
Bothus robinsi	Twospot flounder	Bothidae	demersal	25	3.8
Chascanopsetta lugubris	Pelican flounder	Bothidae	bathydemersal	40	3.5
Engyophrys senta	American spiny flounder	Bothidae	demersal	10	3.4
Monolene antillarum	Slim flounder	Bothidae	demersal	15.2	3.5
Monolene atrimana		Bothidae	bathydemersal	15.2	3.5
Monolene mertensi	Marten's moonflounder	Bothidae	benthopelagic	10	3.4
Monolene microstoma	Smallmouth moonflounder	Bothidae	bathypelagic	20.1	3.6
Monolene sessilicauda	Deepwater flounder	Bothidae	bathydemersal	18	3.6
Trichopsetta caribbaea	Caribbean flounder	Bothidae	demersal	18	3.6
Trichopsetta melasma		Bothidae	demersal	17.4	3.6
Trichopsetta orbisulcus		Bothidae	demersal	14.3	3.5
Trichopsetta ventralis	Sash flounder	Bothidae	demersal	20	3.6
Bovichtus chilensis		Bovichtidae	demersal	11.5	3.4
Cottoperca gobio	Channel bull blenny	Bovichtidae	demersal	80	4.3
Brama brama	Atlantic pomfret	Bramidae	bathypelagic	100	4.1
Brama caribbea	Caribbean pomfret	Bramidae	pelagic-oceanic	25	3.9
Brama dussumieri	Lesser bream	Bramidae	pelagic-neritic	27.5	3.8
Eumegistus brevorti	Tropical pomfret	Bramidae	bathypelagic	67.7	4.5
Pteraclis carolinus	Fanfish	Bramidae	pelagic-oceanic	61	4.3
Pterycombus brama	Atlantic fanfish	Bramidae	pelagic-oceanic	46	4.2
Pterycombus petersii	Prickly fanfish	Bramidae	pelagic-oceanic	44.4	4.2
Taractes asper	Rough pomfret	Bramidae	pelagic-oceanic	61	4.3
Taractes rubescens	Pomfret	Bramidae	benthopelagic	85.4	4.4
Taractichthys longipinnis	Big-scale pomfret	Bramidae	pelagic-oceanic	122	4.5
Bregmaceros atlanticus	Antenna codlet	Bregmacerotidae	pelagic-oceanic	6.7	2.8
Bregmaceros cantori	Striped codlet	Bregmacerotidae	bathypelagic	6.9	3.1
Bregmaceros cayorum		Bregmacerotidae	pelagic-neritic	5.6
Bregmaceros mcclellandi	Unicorn cod	Bregmacerotidae	pelagic-oceanic	11.7	3.3
Bregmaceros nectabanus	Smallscale codlet	Bregmacerotidae	pelagic-neritic	9.3	3.2
Alionematichthys minyomma		Bythitidae	reef-associated	9.5	3.3
Bellottia apoda		Bythitidae	bathydemersal	7.9	3.4
Bidenichthys capensis	Freetail brotula	Bythitidae	demersal	9	3.3
Bythites fuscus	Arctic brotula	Bythitidae	benthopelagic	9	3.3
Bythites gerdae		Bythitidae	benthopelagic	9	3.3
Bythites islandicus		Bythitidae	bathydemersal	9	3.3
Calamopteryx goslinei	Longarm brotula	Bythitidae	reef-associated	7.8	3.3
Calamopteryx robinsorum	Teacher brotula	Bythitidae	demersal	7.8	3.3
Cataetyx alleni		Bythitidae	bathydemersal	12	3.4
Cataetyx bruuni		Bythitidae	bathydemersal	10	3.4
Cataetyx chthamalorhynchus		Bythitidae	bathydemersal	36	3.7
Cataetyx laticeps		Bythitidae	bathydemersal	65	3.8
Cataetyx messieri		Bythitidae	bathydemersal	33.6	3.7
Cataetyx niki	Brown brotula	Bythitidae	bathydemersal	64	3.8
Dermatopsoides kasougae	Orange brotula	Bythitidae	demersal	6.5	3.2
Dermatopsoides talboti	Lesser orange brotula	Bythitidae	demersal	5.7	3.2
Diplacanthopoma brachysoma		Bythitidae	bathydemersal	12.4	3.4
Grammonus claudei	Reef-cave brotula	Bythitidae	reef-associated	10	3.4
Grammonus longhursti		Bythitidae	reef-associated	12.9	3.4
Grammonus opisthodon	Bighead brotula	Bythitidae	demersal	5	3.2
Gunterichthys longipenis	Gold brotula	Bythitidae	demersal	7.5	3.2
Lucifuga simile		Bythitidae	demersal	10.7	3.2
Lucifuga spelaeotes	New Providence cusk-eel	Bythitidae	demersal	13.3	3.3
Melodichthys hadrocephalus		Bythitidae	bathydemersal	12.3	3.3
Ogilbia cayorum	Key brotula	Bythitidae	reef-associated	7.3	3.2
Saccogaster melanomycter		Bythitidae	reef-associated	12.3	3.4
Saccogaster parva		Bythitidae	bathydemersal	12.3	3.4
Saccogaster staigeri		Bythitidae	bathydemersal	12.3	3.4
Stygnobrotula latebricola	Black widow	Bythitidae	reef-associated	7.5	3.3
Thalassobathia pelagica		Bythitidae	bathypelagic	27	3.6
Pterocaesio tile	Dark-banded fusilier	Caesionidae	reef-associated	30	3.3
Callanthias legras	Goldie	Callanthiidae	demersal	25	3.4
Callanthias ruber	Parrot seaperch	Callanthiidae	demersal	60	3.8
Callionymus bairdi	Lancer dragonet	Callionymidae	reef-associated	11.4	3.3
Callionymus lyra	Dragonet	Callionymidae	demersal	30	3.3
Callionymus maculatus		Callionymidae	demersal	16	3.3
Callionymus marleyi	Sand dragonet	Callionymidae	demersal	13	3.3
Callionymus pusillus		Callionymidae	demersal	14	3.3
Callionymus reticulatus	Reticulated dragonet	Callionymidae	demersal	11	3.3
Callionymus risso		Callionymidae	demersal	11	3
Diplogrammus pauciradiatus	Spotted dragonet	Callionymidae	reef-associated	5	3.5
Draculo celetus	Dainty dragonet	Callionymidae	demersal	4.5	3.1
Draculo shango	Shango dragonet	Callionymidae	demersal	2.5	3
Foetorepus agassizii	Spotfin dragonet	Callionymidae	bathydemersal	24.3	3.4
Paracallionymus costatus	Ladder dragonet	Callionymidae	bathydemersal	15	3
Protogrammus sousai		Callionymidae	bathydemersal	8	3.5
Synchiropus goodenbeani	Palefin dragonet	Callionymidae	demersal	22.4	3.4
Synchiropus monacanthus	Deep-water dragonet	Callionymidae	bathydemersal	13	3.5
Synchiropus phaeton	Phaeton dragonet	Callionymidae	demersal	18	3.4
Antigonia capros	Deepbody boarfish	Caproidae	demersal	30.5	4.1
Antigonia combatia	Shortspine boarfish	Caproidae	bathydemersal	15	3.4
Capros aper	Boarfish	Caproidae	demersal	30	3.1
Alectis alexandrina	Alexandria pompano	Carangidae	pelagic-neritic	100	3.6
Alectis ciliaris	African pompano	Carangidae	reef-associated	150	3.8
Alepes djedaba	Shrimp scad	Carangidae	reef-associated	40	3.3
Campogramma glaycos	Vadigo	Carangidae	benthopelagic	66.6	4.5
Carangoides armatus	Longfin trevally	Carangidae	reef-associated	58	4.3
Carangoides bartholomaei	Yellow jack	Carangidae	reef-associated	100	4.5
Carangoides chrysophrys	Longnose trevally	Carangidae	reef-associated	79.9	4.4
Carangoides equula	Whitefin trevally	Carangidae	reef-associated	55.5	4
Carangoides ferdau	Blue trevally	Carangidae	reef-associated	70	4.5
Carangoides gymnostethus	Bludger	Carangidae	reef-associated	90	4.1
Caranx crysos	Blue runner	Carangidae	reef-associated	70	4.4
Caranx heberi	Blacktip trevally	Carangidae	reef-associated	88	3.7
Caranx hippos	Crevalle jack	Carangidae	reef-associated	124	3.5
Caranx ignobilis	Giant trevally	Carangidae	reef-associated	170	4.2
Caranx latus	Horse-eye jack	Carangidae	reef-associated	112.1	4.4
Caranx lugubris	Black jack	Carangidae	benthopelagic	100	4.5
Caranx papuensis	Brassy trevally	Carangidae	reef-associated	88	4
Caranx rhonchus	False scad	Carangidae	benthopelagic	60	3.6
Caranx ruber	Bar jack	Carangidae	reef-associated	69	4.4
Caranx senegallus	Senegal jack	Carangidae	benthopelagic	100	3.9
Chloroscombrus chrysurus	Atlantic bumper	Carangidae	pelagic-neritic	65	3.2
Decapterus macarellus	Mackerel scad	Carangidae	pelagic-oceanic	46	3.4
Decapterus macrosoma	Shortfin scad	Carangidae	reef-associated	35	3.4
Decapterus muroadsi	Amberstripe scad	Carangidae	pelagic-oceanic	55.5	3.4
Decapterus punctatus	Round scad	Carangidae	reef-associated	36.6	4.3
Decapterus tabl	Roughear scad	Carangidae	reef-associated	50	3.2
Elagatis bipinnulata	Rainbow runner	Carangidae	reef-associated	180	3.6
Hemicaranx amblyrhynchus	Bluntnose jack	Carangidae	pelagic-neritic	50	3.1
Hemicaranx bicolor	Bicolor jack	Carangidae	demersal	70	3.9
Lichia amia	Leerfish	Carangidae	pelagic-neritic	200	4.5
Megalaspis cordyla	Torpedo scad	Carangidae	reef-associated	80	4.4
Naucrates ductor	Pilotfish	Carangidae	reef-associated	70	4
Oligoplites palometa	Maracaibo leatherjacket	Carangidae	benthopelagic	49.7	4.5
Oligoplites saliens	Castin leatherjacket	Carangidae	benthopelagic	50	3.8
Oligoplites saurus	Leatherjacket	Carangidae	reef-associated	35	4.5
Parona signata	Parona leatherjacket	Carangidae	demersal	60	3.4
Pseudocaranx dentex	White trevally	Carangidae	reef-associated	122	3.9
Scomberoides commersonnianus	Talang queenfish	Carangidae	reef-associated	120	4.5
Selar boops	Oxeye scad	Carangidae	reef-associated	27.8	3.5
Selar crumenophthalmus	Bigeye scad	Carangidae	reef-associated	70	4.1
Selene brownii	Caribbean moonfish	Carangidae	demersal	29	3.8
Selene dorsalis	African moonfish	Carangidae	demersal	38	4.1
Selene setapinnis	Atlantic moonfish	Carangidae	benthopelagic	60	3.7
Selene vomer	Lookdown	Carangidae	demersal	48.3	4.3
Seriola carpenteri	Guinean amberjack	Carangidae	benthopelagic	72.5	4.5
Seriola dumerili	Greater amberjack	Carangidae	reef-associated	190	4.5
Seriola fasciata	Lesser amberjack	Carangidae	benthopelagic	74.9	4.5
Seriola lalandi	Yellowtail amberjack	Carangidae	benthopelagic	250	4.1
Seriola rivoliana	Longfin yellowtail	Carangidae	reef-associated	177.6	4.5
Seriola zonata	Banded rudderfish	Carangidae	benthopelagic	75	4.5
Seriolina nigrofasciata	Blackbanded trevally	Carangidae	reef-associated	70	4.2
Trachinotus africanus	Southern pompano	Carangidae	reef-associated	92	3.3
Trachinotus botla	Largespotted dart	Carangidae	reef-associated	75	3.2
Trachinotus carolinus	Florida pompano	Carangidae	benthopelagic	64	3.5
Trachinotus cayennensis	Cayenne pompano	Carangidae	demersal	60	3.7
Trachinotus falcatus	Permit	Carangidae	reef-associated	135.4	3.2
Trachinotus goodei	Great pompano	Carangidae	reef-associated	50	4.3
Trachinotus goreensis	Longfin pompano	Carangidae	pelagic-neritic	100	3.7
Trachinotus marginatus	Plata pompano	Carangidae	benthopelagic	76.8	3.7
Trachinotus maxillosus	Guinean pompano	Carangidae	pelagic-neritic	80	3.7
Trachinotus ovatus	Pompano	Carangidae	pelagic-neritic	70	3.7
Trachinotus teraia	Shortfin pompano	Carangidae	pelagic-neritic	68	3.7
Trachurus capensis	Cape horse mackerel	Carangidae	pelagic-neritic	66.6	3.5
Trachurus delagoa	African scad	Carangidae	benthopelagic	35	3.7
Trachurus lathami	Rough scad	Carangidae	reef-associated	40	4
Trachurus longimanus	Crozet scad	Carangidae	demersal	26.8	3.4
Trachurus mediterraneus	Mediterranean horse mackerel	Carangidae	pelagic-oceanic	66.6	3.6
Trachurus murphyi	Chilean jack mackerel	Carangidae	pelagic-oceanic	70	3.5
Trachurus picturatus	Blue jack mackerel	Carangidae	benthopelagic	60	3.3
Trachurus trachurus	Atlantic horse mackerel	Carangidae	pelagic-neritic	70	3.6
Trachurus trecae	Cunene horse mackerel	Carangidae	benthopelagic	38.8	3.5
Uraspis helvola	Whitetongue jack	Carangidae	reef-associated	58	3.8
Uraspis secunda	Cottonmouth jack	Carangidae	pelagic-oceanic	50	4
Carapus acus	Pearl fish	Carapidae	demersal	20.8	4
Carapus bermudensis	Pearlfish	Carapidae	reef-associated	20	3.8
Carapus dubius	Pacific pearlfish	Carapidae	demersal	15	3.7
Echiodon cryomargarites	Messmate	Carapidae	bathydemersal	41	4
Echiodon dawsoni	Chain pearlfish	Carapidae	demersal	11.2	3.6
Echiodon dentatus		Carapidae	demersal	17	3.7
Echiodon drummondii		Carapidae	bathydemersal	30	4
Pyramodon punctatus	Dogtooth pearlfish	Carapidae	benthopelagic	29	3.9
Snyderidia canina		Carapidae	bathydemersal	26.8	3.8
Caristius fasciatus	Greenland manefish	Caristiidae	bathypelagic	30	3.1
Paracaristius maderensis		Caristiidae	bathypelagic	36.6	3.7
Paracaristius nemorosus		Caristiidae	pelagic-oceanic	24.4
Platyberyx opalescens		Caristiidae	bathypelagic	18.5	3.5
Caulophryne jordani	Fanfin angler	Caulophrynidae	bathypelagic	20	4
Caulophryne polynema		Caulophrynidae	bathypelagic	19.1	4
Centracanthus cirrus	Curled picarel	Centracanthidae	benthopelagic	34	3.3
Spicara alta	Bigeye picarel	Centracanthidae	pelagic-neritic	30	3.3
Spicara australis		Centracanthidae	pelagic-oceanic	30	3.3
Spicara axillaris		Centracanthidae	pelagic-neritic	38	3
Spicara maena	Blotched picarel	Centracanthidae	pelagic-neritic	30.5	4.2
Spicara melanurus	Blackspot picarel	Centracanthidae	pelagic-neritic	30	3.5
Spicara nigricauda	Blacktail picarel	Centracanthidae	pelagic-neritic	20	3.2
Spicara smaris	Picarel	Centracanthidae	pelagic-oceanic	20	3
Aeoliscus punctulatus	Speckled shrimpfish	Centriscidae	reef-associated	15	3.1
Macroramphosus gracilis	Slender snipefish	Centriscidae	pelagic-oceanic	15	3.4
Macroramphosus scolopax	Longspine snipefish	Centriscidae	demersal	20	3.5
Notopogon fernandezianus	Orange bellowfish	Centriscidae	bathydemersal	18	3.4
Notopogon lilliei	Crested bellowfish	Centriscidae	demersal	27	3.5
Notopogon macrosolen	Longsnout bellowfish	Centriscidae	bathydemersal	33	3.6
Notopogon xenosoma	Longspine bellowfish	Centriscidae	bathydemersal	17	3.4
Centrophryne spinulosa	Horned lantern fish	Centrophrynidae	bathypelagic	30.1	4
Centropomus ensiferus	Swordspine snook	Centropomidae	benthopelagic	36.2	4
Centropomus mexicanus	Largescale fat snook	Centropomidae	demersal	47.5	4
Centropomus parallelus	Fat snook	Centropomidae	demersal	72	4.2
Centropomus pectinatus	Tarpon snook	Centropomidae	benthopelagic	56	4
Centropomus poeyi	Mexican snook	Centropomidae	demersal	90	4
Centropomus undecimalis	Common snook	Centropomidae	reef-associated	140	4.4
Cepola macrophthalma	Red bandfish	Cepolidae	demersal	80	3.1
Cepola pauciradiata		Cepolidae	demersal	70	3.3
Ceratias holboelli	Kroyer's deep-sea angler fish	Ceratiidae	bathypelagic	120	3.2
Ceratias tentaculatus	Southern seadevil	Ceratiidae	bathydemersal	88	3.3
Ceratias uranoscopus	Stargazing seadevil	Ceratiidae	bathypelagic	29.3	3.3
Cryptopsaras couesii	Triplewart seadevil	Ceratiidae	bathypelagic	44	4.5
Cetomimus gillii		Cetomimidae	bathypelagic	13.7	3
Cetomimus hempeli	Whalefish	Cetomimidae	bathypelagic	9.5	3
Cetomimus picklei		Cetomimidae	bathypelagic	6.8	3
Cetomimus teevani		Cetomimidae	bathypelagic	12.8	3
Cetostoma regani	Pink flabby whalefish	Cetomimidae	bathypelagic	30.1	3.3
Danacetichthys galathenus		Cetomimidae	bathypelagic	6.6	3
Ditropichthys storeri		Cetomimidae	bathypelagic	15.6	3
Eutaeniophorus festivus	Festive ribbonfish	Cetomimidae	bathypelagic	5.3	3
Gyrinomimus grahami	Flabby whalefish	Cetomimidae	bathypelagic	37.8	3
Mirapinna esau	Hairyfish	Cetomimidae	benthopelagic	5.5	3
Notocetichthys trunovi	Trunov southern cetomimid	Cetomimidae	bathypelagic	13.3	3
Parataeniophorus bertelseni		Cetomimidae	bathydemersal	4.1	3
Parataeniophorus gulosus		Cetomimidae	bathypelagic	3.5	3
Procetichthys kreffti		Cetomimidae	bathypelagic	13	3
Rhamphocetichthys savagei	Savage's birdsnouted whalefish	Cetomimidae	bathypelagic	13	3
Acanthemblemaria aspera	Roughhead blenny	Chaenopsidae	reef-associated	4	3.1
Acanthemblemaria betinensis	Speckled blenny	Chaenopsidae	reef-associated	4.7	3.3
Acanthemblemaria chaplini	Papillose blenny	Chaenopsidae	demersal	4.5	3.3
Acanthemblemaria greenfieldi	False papillose blenny	Chaenopsidae	reef-associated	4.7	3.3
Acanthemblemaria johnsoni		Chaenopsidae	reef-associated	4.7	3.3
Acanthemblemaria maria	Secretary blenny	Chaenopsidae	reef-associated	5.1	3.4
Acanthemblemaria medusa	Medusa blenny	Chaenopsidae	reef-associated	4	3.3
Acanthemblemaria paula	Dwarf spinyhead blenny	Chaenopsidae	reef-associated	2.2	3
Acanthemblemaria rivasi	Spotjaw blenny	Chaenopsidae	reef-associated	4.7	3.3
Acanthemblemaria spinosa	Spinyhead blenny	Chaenopsidae	reef-associated	2.8	3.1
Chaenopsis limbaughi	Yellowface pikeblenny	Chaenopsidae	reef-associated	8.5	3.7
Chaenopsis ocellata	Bluethroat pikeblenny	Chaenopsidae	reef-associated	12.5	3.7
Chaenopsis resh		Chaenopsidae	reef-associated	13	3.7
Chaenopsis roseola	Flecked pikeblenny	Chaenopsidae	reef-associated	5.2	3.4
Chaenopsis stephensi		Chaenopsidae	reef-associated	9.9	3.7
Coralliozetus cardonae	Twinhorn blenny	Chaenopsidae	reef-associated	8.5	4
Ekemblemaria nigra	Moth blenny	Chaenopsidae	reef-associated	4.2	3.3
Emblemaria atlantica	Banner blenny	Chaenopsidae	reef-associated	7.5	3.6
Emblemaria biocellata	Twospot blenny	Chaenopsidae	reef-associated	5	3.4
Emblemaria caldwelli	Caribbean blenny	Chaenopsidae	reef-associated	5.4	3.4
Emblemaria caycedoi	Colombian blenny	Chaenopsidae	demersal	5.4	3.4
Emblemaria culmenis	Ridge blenny	Chaenopsidae	demersal	6.2	3.5
Emblemaria diphyodontis	Venezuelan blenny	Chaenopsidae	reef-associated	7	3.5
Emblemaria hyltoni	Filament blenny	Chaenopsidae	reef-associated	3	3.2
Emblemaria pandionis	Sailfin blenny	Chaenopsidae	reef-associated	5	3.4
Emblemaria piratula	Pirate blenny	Chaenopsidae	reef-associated	5	3.4
Emblemariopsis bahamensis	Blackhead blenny	Chaenopsidae	reef-associated	2.5	3.1
Emblemariopsis bottomei	Shorthead blenny	Chaenopsidae	reef-associated	3.6	3.3
Emblemariopsis diaphana	Glass blenny	Chaenopsidae	reef-associated	4	3.3
Emblemariopsis leptocirris		Chaenopsidae	reef-associated	2.9	3.2
Emblemariopsis occidentalis	Flagfin blenny	Chaenopsidae	reef-associated	2.3	3.1
Emblemariopsis pricei	Seafan blenny	Chaenopsidae	reef-associated	3.5	3.2
Emblemariopsis randalli	Hornless blenny	Chaenopsidae	reef-associated	3.8	3.4
Emblemariopsis signifer		Chaenopsidae	reef-associated	3.4	3.2
Emblemariopsis tayrona	Tayrona blenny	Chaenopsidae	reef-associated	2.9	3.2
Hemiemblemaria simulus	Wrasse blenny	Chaenopsidae	reef-associated	10	3.7
Lucayablennius zingaro	Arrow blenny	Chaenopsidae	reef-associated	3.8	3.3
Protemblemaria punctata		Chaenopsidae	reef-associated	6	3.5
Stathmonotus gymnodermis	Naked blenny	Chaenopsidae	reef-associated	4	3.3
Stathmonotus hemphillii	Blackbelly blenny	Chaenopsidae	reef-associated	5	3.4
Stathmonotus stahli	Eelgrass blenny	Chaenopsidae	reef-associated	4	3.3
Stathmonotus tekla		Chaenopsidae	reef-associated	4.9
Chaetodon auriga	Threadfin butterflyfish	Chaetodontidae	reef-associated	23	3.2
Chaetodon blackburnii	Brownburnie	Chaetodontidae	reef-associated	13	2.7
Chaetodon capistratus	Foureye butterflyfish	Chaetodontidae	reef-associated	7.5	3
Chaetodon hoefleri	Four-banded butterflyfish	Chaetodontidae	reef-associated	27	3.5
Chaetodon kleinii	Sunburst butterflyfish	Chaetodontidae	reef-associated	15	3.1
Chaetodon lunula	Raccoon butterflyfish	Chaetodontidae	reef-associated	20	3.3
Chaetodon madagaskariensis	Seychelles butterflyfish	Chaetodontidae	reef-associated	13	3.1
Chaetodon marleyi	Doublesash butterflyfish	Chaetodontidae	reef-associated	20	2.7
Chaetodon ocellatus	Spotfin butterflyfish	Chaetodontidae	reef-associated	20	3.2
Chaetodon robustus	Three-banded butterflyfish	Chaetodontidae	reef-associated	17.7	3.3
Chaetodon sanctaehelenae	Saint Helena butterflyfish	Chaetodontidae	reef-associated	18	3.3
Chaetodon sedentarius	Reef butterflyfish	Chaetodontidae	reef-associated	15	2.8
Chaetodon striatus	Banded butterflyfish	Chaetodontidae	reef-associated	16	3.2
Chaetodon unimaculatus	Teardrop butterflyfish	Chaetodontidae	reef-associated	20	3.1
Prognathodes aculeatus	Longsnout butterflyfish	Chaetodontidae	reef-associated	10	3.2
Prognathodes aya	Bank butterflyfish	Chaetodontidae	reef-associated	15	3.3
Prognathodes dichrous	Bicolor butterflyfish	Chaetodontidae	reef-associated	16	3.5
Prognathodes guyanensis	French butterflyfish	Chaetodontidae	reef-associated	13.6	2.8
Prognathodes marcellae		Chaetodontidae	reef-associated	11.6	3.2
Prognathodes obliquus	Oblique butterflyfish	Chaetodontidae	demersal	15	3.3
Champsodon capensis	Gaper	Champsodontidae	bathypelagic	14	4.2
Chanos chanos	Milkfish	Chanidae	benthopelagic	219.6	2
Chaenocephalus aceratus	Blackfin icefish	Channichthyidae	demersal	72	3.5
Chaenodraco wilsoni	Spiny icefish	Channichthyidae	benthopelagic	43	3.3
Champsocephalus esox	Pike icefish	Channichthyidae	demersal	42.7	3.9
Champsocephalus gunnari	Mackerel icefish	Channichthyidae	pelagic-oceanic	66	3.2
Chionobathyscus dewitti		Channichthyidae	bathydemersal	60	3.8
Chionodraco hamatus		Channichthyidae	demersal	49	3.7
Chionodraco myersi	Myers' icefish	Channichthyidae	bathydemersal	38	3.8
Chionodraco rastrospinosus	Ocellated icefish	Channichthyidae	benthopelagic	52	3.8
Cryodraco antarcticus	Long-fingered icefish	Channichthyidae	bathydemersal	48	3.6
Dacodraco hunteri		Channichthyidae	bathydemersal	29	3.5
Neopagetopsis ionah	Jonah's icefish	Channichthyidae	benthopelagic	56	3.4
Pagetopsis macropterus		Channichthyidae	demersal	33	4.1
Pagetopsis maculatus		Channichthyidae	bathydemersal	25	3.5
Pseudochaenichthys georgianus	South Georgia icefish	Channichthyidae	demersal	60	3.3
Chaunacops roseus		Chaunacidae	bathydemersal	15.6	3.9
Chaunax pictus	Pink frogmouth	Chaunacidae	bathydemersal	40	4.3
Chaunax stigmaeus	Redeye gaper	Chaunacidae	bathydemersal	30.5	4.2
Chaunax suttkusi		Chaunacidae	bathydemersal	27.8	4.2
Cheilodactylus fasciatus	Redfingers	Cheilodactylidae	demersal	30	3.4
Cheilodactylus pixi	Barred fingerfin	Cheilodactylidae	demersal	18	3.2
Chirodactylus brachydactylus	Two-tone fingerfin	Cheilodactylidae	reef-associated	40	3.5
Chirodactylus grandis	Bank steenbras	Cheilodactylidae	demersal	180	3.3
Chirodactylus jessicalenorum	Natal fingerfin	Cheilodactylidae	reef-associated	50	3.8
Nemadactylus bergi	Castaneta	Cheilodactylidae	demersal	48.2	3.2
Nemadactylus macropterus	Tarakihi	Cheilodactylidae	demersal	70	3.4
Chiasmodon braueri		Chiasmodontidae	pelagic-oceanic	5.4	3.2
Chiasmodon niger	Black swallower	Chiasmodontidae	pelagic-oceanic	30.5	4.2
Chiasmodon subniger		Chiasmodontidae	pelagic-oceanic	3.7	3.1
Dysalotus alcocki		Chiasmodontidae	bathypelagic	27.5	3.5
Dysalotus oligoscolus		Chiasmodontidae	bathypelagic	27.6	3.5
Kali indica		Chiasmodontidae	bathypelagic	31.9	3.5
Kali macrodon		Chiasmodontidae	bathypelagic	31.7	3.5
Kali macrura		Chiasmodontidae	bathypelagic	15	3.3
Kali parri		Chiasmodontidae	bathypelagic	27.8	3.5
Pseudoscopelus altipinnis		Chiasmodontidae	bathypelagic	24.4	3.4
Pseudoscopelus cordilluminatus		Chiasmodontidae	bathypelagic	11.9
Pseudoscopelus scriptus		Chiasmodontidae	bathypelagic	18.9	3.4
Pseudoscopelus scutatus		Chiasmodontidae	bathypelagic	6.2	3.2
Chilorhinus suensonii	Seagrass eel	Chlopsidae	reef-associated	18	4
Chlopsis bicolor	Bicoloured false moray	Chlopsidae	demersal	42	3.7
Chlopsis dentatus	Mottled false moray	Chlopsidae	demersal	19.9	3.5
Chlopsis olokun		Chlopsidae	demersal	30.2	3.6
Kaupichthys hyoproroides	False moray	Chlopsidae	reef-associated	30	3.6
Kaupichthys nuchalis	Collared eel	Chlopsidae	reef-associated	16	3.5
Chlorophthalmus agassizi	Shortnose greeneye	Chlorophthalmidae	bathydemersal	40	3.7
Chlorophthalmus punctatus	Spotted greeneye	Chlorophthalmidae	bathydemersal	20	3.5
Parasudis fraserbrunneri		Chlorophthalmidae	bathydemersal	25.3	3.8
Parasudis truculenta	Longnose greeneye	Chlorophthalmidae	demersal	25	4.2
Amblycirrhitus earnshawi		Cirrhitidae	demersal	8.1	3.4
Amblycirrhitus pinos	Redspotted hawkfish	Cirrhitidae	reef-associated	11.6	3.2
Cirrhitichthys oxycephalus	Coral hawkfish	Cirrhitidae	reef-associated	10	4
Cirrhitus atlanticus	West African hawkfish	Cirrhitidae	demersal	19.5	3.6
Cirrhitus pinnulatus	Stocky hawkfish	Cirrhitidae	reef-associated	30	3.6
Cyprinocirrhites polyactis	Swallowtail hawkfish	Cirrhitidae	reef-associated	15	3.2
Paracirrhites arcatus	Arc-eye hawkfish	Cirrhitidae	reef-associated	20	3.6
Citharus linguatula	Spotted flounder	Citharidae	demersal	30	4
Blennioclinus brachycephalus	Lace klipfish	Clinidae	demersal	15	3.3
Blennioclinus stella	Silverbubble klipfish	Clinidae	demersal	5	3.2
Blennophis anguillaris	Snaky klipfish	Clinidae	demersal	30	3.5
Blennophis striatus	Striped klipfish	Clinidae	demersal	17.5	3.4
Cancelloxus burrelli	Slender platanna-klipfish	Clinidae	demersal	12	3.3
Cancelloxus elongatus	Whiteblotched klipfish	Clinidae	demersal	5	3.3
Cirrhibarbis capensis	Barbelled klipfish	Clinidae	demersal	36	3.3
Climacoporus navalis	Fleet klipfish	Clinidae	demersal	7	3.2
Clinitrachus argentatus	Cline	Clinidae	demersal	10	3.5
Clinoporus biporosus	Ladder klipfish	Clinidae	demersal	13	3.4
Clinus acuminatus	Sad klipfish	Clinidae	demersal	13	3.3
Clinus agilis	Agile klipfish	Clinidae	demersal	10	3.3
Clinus berrisfordi	Onrust klipfish	Clinidae	demersal	12	3.3
Clinus brevicristatus	Cape klipfish	Clinidae	demersal	12	3.3
Clinus cottoides	Bluntnose klipfish	Clinidae	demersal	15	3.2
Clinus helenae	Helen's klipfish	Clinidae	demersal	10	3.3
Clinus heterodon	Westcoast klipfish	Clinidae	demersal	13	3.3
Clinus latipennis	False Bay klipfish	Clinidae	demersal	12	3.3
Clinus nematopterus	Chinese klipfish	Clinidae	demersal	11	3.5
Clinus robustus	Robust klipfish	Clinidae	demersal	50	3.5
Clinus rotundifrons	Kelp klipfish	Clinidae	demersal	6.1	3.2
Clinus spatulatus	Bot River klipfish	Clinidae	demersal	17.5	3.4
Clinus superciliosus		Clinidae	demersal	30	3.4
Clinus taurus	Bull klipfish	Clinidae	demersal	23	3.4
Clinus venustris	Speckled klipfish	Clinidae	demersal	12	3.3
Clinus woodi	Oldman klipfish	Clinidae	demersal	16	3.3
Fucomimus mus	Mousey klipfish	Clinidae	demersal	10	3.3
Muraenoclinus dorsalis	Nosestripe klipfish	Clinidae	demersal	10	3.3
Pavoclinus graminis	Grass klipfish	Clinidae	demersal	16	3.4
Pavoclinus laurentii	Rippled klipfish	Clinidae	demersal	13	3.3
Pavoclinus litorafontis	Slinky klipfish	Clinidae	demersal	21	3.3
Pavoclinus mentalis	Bearded klipfish	Clinidae	demersal	30	3.5
Pavoclinus myae	Mya's klipfish	Clinidae	demersal	5	3.3
Pavoclinus pavo	Peacock klipfish	Clinidae	demersal	15	3.3
Pavoclinus profundus	Deepwater klipfish	Clinidae	demersal	5	3.2
Pavoclinus smalei	Deep-reef klipfish	Clinidae	demersal	5.5	3.2
Ribeiroclinus eigenmanni		Clinidae	benthopelagic	14.8	3.4
Smithichthys fucorum	Leafy klipfish	Clinidae	demersal	30	3.5
Xenopoclinus kochi	Platanna klipfish	Clinidae	demersal	10	3.3
Xenopoclinus leprosus	Leprous platanna-klipfish	Clinidae	demersal	8	3.3
Alosa aestivalis	Blueback shad	Clupeidae	pelagic-neritic	48.8	3.6
Alosa alabamae	Alabama shad	Clupeidae	pelagic-neritic	62.2	2.7
Alosa alosa	Allis shad	Clupeidae	pelagic-neritic	83	3.6
Alosa chrysochloris	Skipjack shad	Clupeidae	pelagic-neritic	61	3.9
Alosa fallax	Twaite shad	Clupeidae	pelagic-neritic	73.2	3.6
Alosa mediocris	Hickory shad	Clupeidae	pelagic-neritic	73.2	4.1
Alosa pseudoharengus	Alewife	Clupeidae	pelagic-neritic	48.8	3.5
Alosa sapidissima	American shad	Clupeidae	pelagic-neritic	76	3.5
Brevoortia aurea	Brazilian menhaden	Clupeidae	pelagic-neritic	31.7	2.8
Brevoortia gunteri	Finescale menhaden	Clupeidae	pelagic-neritic	36.6	2.4
Brevoortia patronus	Gulf menhaden	Clupeidae	pelagic-neritic	42.7	2.2
Brevoortia pectinata	Argentine menhaden	Clupeidae	pelagic-neritic	42.7	3.4
Brevoortia smithi	Yellowfin menhaden	Clupeidae	pelagic-neritic	40.3	2.3
Brevoortia tyrannus	Atlantic menhaden	Clupeidae	pelagic-neritic	50	2.3
Clupea bentincki	Araucanian herring	Clupeidae	pelagic-neritic	34.6	2.7
Clupea harengus	Atlantic herring	Clupeidae	benthopelagic	54.9	3.2
Clupea pallasii marisalbi	White Sea herring	Clupeidae	pelagic-neritic	34	3.1
Clupea pallasii pallasii	Pacific herring	Clupeidae	pelagic-neritic	46	3.2
Clupea pallasii suworowi	Chosa herring	Clupeidae	pelagic-neritic	31.5	3.1
Dorosoma cepedianum	American gizzard shad	Clupeidae	pelagic-neritic	63.3	2.4
Dorosoma petenense	Threadfin shad	Clupeidae	pelagic-neritic	26.8	3.1
Ethmalosa fimbriata	Bonga shad	Clupeidae	pelagic-neritic	45	2.5
Harengula clupeola	False herring	Clupeidae	reef-associated	18	3.4
Harengula humeralis	Redear herring	Clupeidae	reef-associated	22	3.4
Harengula jaguana	Scaled herring	Clupeidae	reef-associated	21.2	3.3
Herklotsichthys quadrimaculatus	Bluestripe herring	Clupeidae	reef-associated	30.5	3.6
Jenkinsia lamprotaenia	Dwarf round herring	Clupeidae	reef-associated	7.5	3.4
Jenkinsia majua	Little-eye round herring	Clupeidae	reef-associated	6.7	3.4
Jenkinsia parvula	Short-striped round herring	Clupeidae	reef-associated	6.7	3.4
Jenkinsia stolifera	Florida round herring	Clupeidae	reef-associated	4.9	3.4
Lile piquitinga	Atlantic piquitinga	Clupeidae	pelagic-neritic	18.3	3.3
Opisthonema oglinum	Atlantic thread herring	Clupeidae	reef-associated	38	4.5
Ramnogaster arcuata	Jenyns's sprat	Clupeidae	pelagic-neritic	11	3.2
Sardina pilchardus	European pilchard	Clupeidae	pelagic-neritic	33.5	3
Sardinella aurita	Round sardinella	Clupeidae	reef-associated	31	3.4
Sardinella brasiliensis	Brazilian sardinella	Clupeidae	pelagic-neritic	30.5	3.1
Sardinella maderensis	Madeiran sardinella	Clupeidae	pelagic-neritic	41.4	3.2
Sardinella rouxi	Yellowtail sardinella	Clupeidae	pelagic-neritic	19.5	2.8
Sardinops sagax	South American pilchard	Clupeidae	pelagic-neritic	48.2	2.4
Sprattus fuegensis	Falkland sprat	Clupeidae	pelagic-neritic	22	3.4
Sprattus sprattus	European sprat	Clupeidae	pelagic-neritic	19.5	3
Coloconger cadenati		Colocongridae	bathydemersal	90	3.5
Coloconger eximia		Colocongridae	bathydemersal	56.9	3.8
Coloconger meadi		Colocongridae	bathydemersal	37.7	3.7
Congiopodus peruvianus	Horsefish	Congiopodidae	demersal	33.1	3.3
Congiopodus spinifer	Spinenose horsefish	Congiopodidae	demersal	45	3.3
Congiopodus torvus	Smooth horsefish	Congiopodidae	demersal	76	3.4
Ariosoma anale	Longtrunk conger	Congridae	demersal	36.3	3.9
Ariosoma balearicum	Bandtooth conger	Congridae	reef-associated	35	3.9
Ariosoma coquettei		Congridae	demersal	28.1	3.8
Ariosoma mellissii	Silver Eel	Congridae	demersal	42.8	3.9
Ariosoma selenops		Congridae	demersal	39.3	3.9
Bassanago albescens	Hairy conger	Congridae	bathydemersal	100	3.5
Bassanago nielseni		Congridae	bathydemersal	46.5	3.8
Bathycongrus bertini		Congridae	bathydemersal	39	3.8
Bathycongrus bullisi	Bullish conger	Congridae	bathydemersal	39.5	3.8
Bathycongrus thysanochilus	Conger eel	Congridae	bathydemersal	38.4	3.8
Bathyuroconger vicinus	Large-toothed conger	Congridae	benthopelagic	88	4.5
Conger cinereus	Longfin African conger	Congridae	reef-associated	140	4.4
Conger conger	European conger	Congridae	demersal	300	4.3
Conger esculentus	Grey conger	Congridae	reef-associated	160	4.5
Conger oceanicus	American conger	Congridae	demersal	230	4.5
Conger orbignianus	Argentine conger	Congridae	demersal	112	3.7
Conger triporiceps	Manytooth conger	Congridae	reef-associated	100	4
Conger wilsoni	Cape conger	Congridae	reef-associated	150	3.5
Gnathophis andriashevi		Congridae	bathydemersal	36.5	3.5
Gnathophis bathytopos	Blackgut conger	Congridae	bathydemersal	35	3.5
Gnathophis bracheatopos	Longeye conger	Congridae	demersal	35	3.5
Gnathophis capensis	Southern conger	Congridae	demersal	37	3.5
Gnathophis codoniphorus		Congridae	demersal	37.3	3.5
Gnathophis habenatus	Little conger eel	Congridae	demersal	43	3.5
Gnathophis mystax	Thinlip conger	Congridae	demersal	60	3.6
Gnathophis parini		Congridae	bathydemersal	13.7	3.3
Gnathophis smithi		Congridae	demersal	41.1	3.5
Gorgasia inferomaculata		Congridae	demersal	77.8	3.4
Heteroconger camelopardalis		Congridae	demersal	50.4	3.4
Heteroconger longissimus	Brown garden eel	Congridae	reef-associated	51	3.1
Heteroconger luteolus	Yellow garden eel	Congridae	demersal	50.4	3.4
Japonoconger africanus		Congridae	bathydemersal	42.5	3.9
Parabathymyrus oregoni	Flapnose conger	Congridae	demersal	38.7	3.9
Paraconger caudilimbatus	Margintail conger	Congridae	reef-associated	51	4
Paraconger guianensis		Congridae	demersal	50.7	4
Paraconger macrops	Blackspot conger	Congridae	demersal	50	4
Paraconger notialis	Guinean conger	Congridae	demersal	62.7	4
Pseudophichthys splendens	Purplemouthed conger	Congridae	bathydemersal	38.7	3.8
Rhynchoconger flavus	Yellow conger	Congridae	demersal	150	4.1
Rhynchoconger gracilior	Whiptail conger	Congridae	bathydemersal	61	3.9
Rhynchoconger guppyi		Congridae	demersal	95	4
Uroconger drachi		Congridae	demersal	41.5	3.8
Uroconger syringinus	Threadtail conger	Congridae	demersal	38	3.8
Xenomystax bidentatus		Congridae	demersal	84	4
Coryphaena equiselis	Pompano dolphinfish	Coryphaenidae	pelagic-oceanic	127	4.5
Coryphaena hippurus	Common dolphinfish	Coryphaenidae	pelagic-neritic	210	4.4
Artediellus atlanticus	Atlantic hookear sculpin	Cottidae	demersal	18.3	3.4
Artediellus scaber	Hamecon	Cottidae	demersal	8.4	3.3
Artediellus uncinatus	Arctic hookear sculpin	Cottidae	demersal	10	3.5
Cottus gobio	Bullhead	Cottidae	demersal	18	3.2
Cottus poecilopus	Alpine bullhead	Cottidae	demersal	18.3	3
Gymnocanthus tricuspis	Arctic staghorn sculpin	Cottidae	demersal	30	3.5
Icelus bicornis	Twohorn sculpin	Cottidae	demersal	19.1	3.1
Icelus spatula	Spatulate sculpin	Cottidae	demersal	21	3.9
Micrenophrys lilljeborgii	Norway bullhead	Cottidae	demersal	9	3.8
Myoxocephalus aenaeus	Grubby	Cottidae	demersal	18	3.7
Myoxocephalus octodecemspinosus	Longhorn sculpin	Cottidae	demersal	46	3.5
Myoxocephalus quadricornis	Fourhorn sculpin	Cottidae	demersal	60	3.7
Myoxocephalus scorpioides	Arctic sculpin	Cottidae	demersal	22	3.4
Myoxocephalus scorpius	Shorthorn sculpin	Cottidae	demersal	60	3.9
Taurulus bubalis	Longspined bullhead	Cottidae	demersal	25	3.6
Triglops murrayi	Moustache sculpin	Cottidae	demersal	24.4	3.5
Triglops nybelini	Bigeye sculpin	Cottidae	demersal	24.9	3.3
Triglops pingelii	Ribbed sculpin	Cottidae	demersal	24.6	3.4
Apodocreedia vanderhorsti	Longfin burrower	Creediidae	benthopelagic	8	3.2
Chalixodytes chameleontoculis	Sand dart	Creediidae	reef-associated	4.6	3.1
Cryptacanthodes maculatus	Wrymouth	Cryptacanthodidae	demersal	97	3.5
Cyclopteropsis jordani	Smooth lumpfish	Cyclopteridae	demersal	7.4	3.4
Cyclopteropsis mcalpini	Arctic lumpsucker	Cyclopteridae	demersal	7.5	3.4
Cyclopterus lumpus	Lumpfish	Cyclopteridae	benthopelagic	61	3.9
Eumicrotremus andriashevi	Pimpled lumpsucker	Cyclopteridae	demersal	5.9	3.2
Eumicrotremus derjugini	Leatherfin lumpsucker	Cyclopteridae	demersal	12.2	3.3
Eumicrotremus spinosus	Atlantic spiny lumpsucker	Cyclopteridae	demersal	12.3	3.5
Cyema atrum	Bobtail eel	Cyematidae	bathypelagic	15	3.6
Neocyema erythrosoma		Cyematidae	bathypelagic	16	3.6
Cynoglossus browni	Nigerian tonguesole	Cynoglossidae	demersal	49	3.4
Cynoglossus cadenati	Ghanian tonguesole	Cynoglossidae	demersal	20	3.4
Cynoglossus canariensis	Canary tonguesole	Cynoglossidae	demersal	60	3.6
Cynoglossus capensis	Sand tonguefish	Cynoglossidae	demersal	31	3
Cynoglossus monodi	Guinean tonguesole	Cynoglossidae	demersal	40	3.6
Cynoglossus senegalensis	Senegalese tonguesole	Cynoglossidae	demersal	66	3.6
Cynoglossus zanzibarensis	Zanzibar tonguesole	Cynoglossidae	demersal	32	3.6
Symphurus arawak	Caribbean tonguefish	Cynoglossidae	reef-associated	5.1	3.1
Symphurus billykrietei	Kriete's tonguefish	Cynoglossidae	bathydemersal	14.5	3.3
Symphurus caribbeanus		Cynoglossidae	demersal	15.9	3.3
Symphurus civitatium	Offshore tonguefish	Cynoglossidae	demersal	17	3.3
Symphurus diomedeanus	Spottedfin tonguefish	Cynoglossidae	reef-associated	22	3.3
Symphurus ginsburgi	Ginsburg's tonguefish	Cynoglossidae	bathydemersal	11	3.2
Symphurus jenynsi	Jenyn's tonguefish	Cynoglossidae	demersal	38.9	3.3
Symphurus kyaropterygium		Cynoglossidae	demersal	14.6	3.3
Symphurus ligulatus	Elongate tonguesole	Cynoglossidae	demersal	13.7	3.5
Symphurus lubbocki		Cynoglossidae	demersal	15.7	3.3
Symphurus marginatus	Margined tonguefish	Cynoglossidae	bathydemersal	17.8	3.3
Symphurus minor	Largescale tonguefish	Cynoglossidae	demersal	9	3.2
Symphurus nebulosus	Freckled tonguefish	Cynoglossidae	bathydemersal	10	3.2
Symphurus nigrescens	Tonguesole	Cynoglossidae	demersal	14.6	3.3
Symphurus normani	Norman's tonguesole	Cynoglossidae	demersal	70	3.5
Symphurus oculellus		Cynoglossidae	demersal	23.1	3.3
Symphurus ommaspilus	Ocellated tonguefish	Cynoglossidae	demersal	6.9	3.2
Symphurus parvus	Pygmy tonguefish	Cynoglossidae	demersal	9	3.2
Symphurus pelicanus	Longtail tonguefish	Cynoglossidae	demersal	9	3.2
Symphurus piger	Deepwater tonguefish	Cynoglossidae	bathydemersal	15	3.3
Symphurus plagiusa	Blackcheek tonguefish	Cynoglossidae	demersal	21	3
Symphurus plagusia	Duskycheek tonguefish	Cynoglossidae	demersal	25	3.3
Symphurus pusillus	Northern tonguefish	Cynoglossidae	demersal	7.5	3.2
Symphurus reticulatus		Cynoglossidae	demersal	15.7	3.3
Symphurus rhytisma	Patchtail tonguefish	Cynoglossidae	demersal	5.5	3.1
Symphurus stigmosus	Blotchfin tonguefish	Cynoglossidae	bathydemersal	15.4	3.3
Symphurus tessellatus		Cynoglossidae	demersal	26.8	3.3
Symphurus trewavasae	Trewavas' tonguefish	Cynoglossidae	demersal	17	3.3
Symphurus urospilus	Spottail tonguefish	Cynoglossidae	demersal	20.3	3.3
Symphurus variegatus		Cynoglossidae	bathydemersal	9	3.2
Abramis brama	Freshwater bream	Cyprinidae	benthopelagic	82	2.9
Alburnus alburnus	Bleak	Cyprinidae	benthopelagic	25	3
Leuciscus aspius	Asp	Cyprinidae	benthopelagic	120	4.5
Leuciscus idus	Ide	Cyprinidae	benthopelagic	103.7	3.8
Leuciscus leuciscus	Common dace	Cyprinidae	benthopelagic	40	2.6
Pelecus cultratus	Sichel	Cyprinidae	pelagic	60	3.3
Phoxinus phoxinus	Eurasian minnow	Cyprinidae	demersal	14	3.1
Rutilus rutilus	Roach	Cyprinidae	benthopelagic	61	2.8
Squalius cephalus	Chub	Cyprinidae	benthopelagic	73.2	3
Tinca tinca	Tench	Cyprinidae	demersal	85.4	3.5
Vimba vimba	Vimba bream	Cyprinidae	benthopelagic	50	3.2
Cyprinodon artifrons	Yucatan pupfish	Cyprinodontidae	benthopelagic	6	2.9
Cyprinodon variegatus variegatus	Sheepshead minnow	Cyprinodontidae	benthopelagic	9	2.9
Floridichthys carpio	Goldspotted killifish	Cyprinodontidae	benthopelagic	8	3.4
Cyttus traversi	King dory	Cyttidae	bathydemersal	54	4.3
Dactyloptena orientalis	Oriental flying gurnard	Dactylopteridae	reef-associated	40	3.7
Dactyloptena peterseni	Starry flying gurnard	Dactylopteridae	demersal	36	3.5
Dactylopterus volitans	Flying gurnard	Dactylopteridae	reef-associated	61	3.6
Dactylagnus peratikos		Dactyloscopidae	demersal	8	4.4
Dactyloscopus boehlkei		Dactyloscopidae	demersal	6.8	4.1
Dactyloscopus comptus		Dactyloscopidae	demersal	4.8	3.8
Dactyloscopus crossotus	Bigeye stargazer	Dactyloscopidae	demersal	7.5	4.2
Dactyloscopus foraminosus	Reticulate stargazer	Dactyloscopidae	demersal	7.2	4.2
Dactyloscopus moorei	Speckled stargazer	Dactyloscopidae	demersal	8	4.3
Dactyloscopus poeyi	Shortchin stargazer	Dactyloscopidae	demersal	7.1	4.2
Dactyloscopus tridigitatus	Sand stargazer	Dactyloscopidae	reef-associated	9	4.4
Gillellus greyae	Arrow stargazer	Dactyloscopidae	reef-associated	9	4
Gillellus healae	Masked stargazer	Dactyloscopidae	demersal	7.5	4
Gillellus jacksoni		Dactyloscopidae	demersal	3	3.4
Gillellus uranidea	Warteye stargazer	Dactyloscopidae	demersal	5	3.9
Leurochilus acon	Smoothlip stargazer	Dactyloscopidae	demersal	3.6	3.6
Myxodagnus belone	Dartfish	Dactyloscopidae	demersal	10	4.7
Platygillellus rubrocinctus	Saddle stargazer	Dactyloscopidae	reef-associated	6.4	4.3
Platygillellus smithi		Dactyloscopidae	demersal	4.2	3.8
Storrsia olsoni		Dactyloscopidae	demersal	3.6	3.6
Derichthys serpentinus	Narrownecked oceanic eel	Derichthyidae	bathypelagic	40	3.1
Nessorhamphus danae	Dana duckbill eel	Derichthyidae	bathypelagic	30	3.2
Nessorhamphus ingolfianus	Duckbill oceanic eel	Derichthyidae	bathypelagic	59.8	3.5
Bufoceratias wedli		Diceratiidae	bathypelagic	25	4.1
Diceratias pileatus		Diceratiidae	bathypelagic	28.7	4.2
Dichistius capensis	Galjoen	Dichistiidae	reef-associated	80	3.3
Dichistius multifasciatus	Banded galjoen	Dichistiidae	benthopelagic	35	3.6
Centrarchops chapini	Barred seabass	Dinopercidae	demersal	30.7	3.5
Dinoperca petersi	Lampfish	Dinopercidae	reef-associated	75	3.6
Chilomycterus antennatus	Bridled burrfish	Diodontidae	reef-associated	38	3.4
Chilomycterus antillarum	Web burrfish	Diodontidae	reef-associated	30	3.4
Chilomycterus reticulatus	Spotfin burrfish	Diodontidae	reef-associated	30.2	3.5
Chilomycterus schoepfii	Striped burrfish	Diodontidae	reef-associated	27.9	3.3
Chilomycterus spinosus mauretanicus	Guinean burrfish	Diodontidae	demersal	25	3.6
Cyclichthys orbicularis	Birdbeak burrfish	Diodontidae	reef-associated	30	3.6
Diodon eydouxii	Pelagic porcupinefish	Diodontidae	pelagic-neritic	27	3.7
Diodon holocanthus	Longspined porcupinefish	Diodontidae	reef-associated	50	3.3
Diodon hystrix	Spot-fin porcupinefish	Diodontidae	reef-associated	91	3.4
Diodon liturosus	Black-blotched porcupinefish	Diodontidae	reef-associated	65	3.4
Lophodiodon calori	Four-bar porcupinefish	Diodontidae	demersal	36.6	3.5
Diretmichthys parini	Parin's spinyfish	Diretmidae	bathypelagic	40	3.5
Diretmoides pauciradiatus	Longwing spinyfin	Diretmidae	bathypelagic	45.1	3.5
Diretmus argenteus	Silver spinyfin	Diretmidae	bathypelagic	27.6	3.4
Centrodraco acanthopoma		Draconettidae	bathydemersal	11.8	3.5
Centrodraco oregonus		Draconettidae	bathydemersal	13.2	3.3
Drepane africana	African sicklefish	Drepaneidae	benthopelagic	45	3.1
Drepane longimana	Concertina fish	Drepaneidae	reef-associated	50	3.5
Etrumeus sadina	Red-eye round herring	Dussumieriidae	pelagic-neritic	33	3.5
Etrumeus whiteheadi	Whitehead's round herring	Dussumieriidae	pelagic-neritic	26.8	3.4
Eleginops maclovinus	Patagonian blennie	Eleginopsidae	benthopelagic	90	3.3
Bostrychus africanus		Eleotridae	demersal	21	3.9
Butis melanostigma	Black-spotted gudgeon	Eleotridae	demersal	18	4.2
Dormitator lebretonis		Eleotridae	demersal	12.4	2.5
Dormitator maculatus	Fat sleeper	Eleotridae	demersal	70	2.5
Eleotris amblyopsis	Large-scaled spinycheek sleeper	Eleotridae	demersal	9.8	4
Eleotris perniger	Smallscaled spinycheek sleeper	Eleotridae	demersal	20.5	3.6
Eleotris pisonis	Spinycheek sleeper	Eleotridae	demersal	25	3.7
Eleotris senegalensis		Eleotridae	demersal	21.2	3.6
Eleotris vittata		Eleotridae	demersal	26.5	3.7
Erotelis smaragdus	Emerald sleeper	Eleotridae	demersal	20	3.4
Gobiomorus dormitor	Bigmouth sleeper	Eleotridae	demersal	60	3.7
Guavina guavina	Guavina	Eleotridae	demersal	23	4.2
Elops lacerta	West African ladyfish	Elopidae	pelagic-neritic	100	4.2
Elops machnata	Tenpounder	Elopidae	pelagic-neritic	131	4
Elops saurus	Ladyfish	Elopidae	reef-associated	100	4
Elops senegalensis	Senegalese ladyfish	Elopidae	pelagic-neritic	90	4.1
Emmelichthys nitidus nitidus	Cape bonnetmouth	Emmelichthyidae	bathydemersal	50	3.6
Emmelichthys ruber	Red rover	Emmelichthyidae	demersal	30	3.4
Erythrocles monodi	Atlantic rubyfish	Emmelichthyidae	pelagic-neritic	65	3.4
Plagiogeneion rubiginosum	Rubyfish	Emmelichthyidae	bathydemersal	60	3.4
Anchoa cayorum	Key anchovy	Engraulidae	pelagic-oceanic	11	3.3
Anchoa choerostoma	Bermuda anchovy	Engraulidae	pelagic-neritic	9.1	3.3
Anchoa colonensis	Narrow-striped anchovy	Engraulidae	pelagic-neritic	14	3.4
Anchoa cubana	Cuban anchovy	Engraulidae	pelagic-neritic	10	3.3
Anchoa filifera	Longfinger anchovy	Engraulidae	pelagic-neritic	12	3.4
Anchoa hepsetus	Broad-striped anchovy	Engraulidae	pelagic-neritic	15.3	3.3
Anchoa januaria	Rio anchovy	Engraulidae	pelagic-neritic	7.5	2.9
Anchoa lamprotaenia	Big-eye anchovy	Engraulidae	pelagic-neritic	12	3.4
Anchoa lyolepis	Shortfinger anchovy	Engraulidae	reef-associated	12	3.4
Anchoa marinii	Marini's anchovy	Engraulidae	pelagic-oceanic	17.1	3.4
Anchoa mitchilli	Bay anchovy	Engraulidae	pelagic-neritic	12.2	3.5
Anchoa parva	Little anchovy	Engraulidae	pelagic-neritic	7.3	3.3
Anchoa pectoralis	Bigfin anchovy	Engraulidae	pelagic-neritic	8.3	3.3
Anchoa spinifer	Spicule anchovy	Engraulidae	pelagic-neritic	24	4.1
Anchoa tricolor	Piquitinga anchovy	Engraulidae	pelagic-neritic	11.8	3.4
Anchoa trinitatis	Trinidad anchovy	Engraulidae	pelagic-neritic	14	3.4
Anchovia clupeoides	Zabaleta anchovy	Engraulidae	benthopelagic	30	3.4
Anchoviella blackburni	Blackburns's anchovy	Engraulidae	pelagic-neritic	3.7	3.1
Anchoviella brevirostris	Snubnose anchovy	Engraulidae	pelagic-neritic	9	3.2
Anchoviella cayennensis	Cayenne anchovy	Engraulidae	pelagic-neritic	16.5	3.3
Anchoviella elongata	Elongate anchovy	Engraulidae	pelagic-neritic	11	3.3
Anchoviella lepidentostole	Broadband anchovy	Engraulidae	pelagic-neritic	14.1	3.1
Anchoviella perfasciata	Poey's anchovy	Engraulidae	pelagic-neritic	11	3.3
Cetengraulis edentulus	Atlantic anchoveta	Engraulidae	pelagic-neritic	17.1	2.1
Engraulis anchoita	Argentine anchovy	Engraulidae	pelagic-neritic	20.7	2.5
Engraulis encrasicolus	European anchovy	Engraulidae	pelagic-neritic	24.4	3.1
Engraulis eurystole	Silver anchovy	Engraulidae	pelagic-neritic	15.5	2.9
Engraulis japonicus	Japanese anchovy	Engraulidae	pelagic-neritic	18	2.6
Lycengraulis grossidens	Atlantic sabretooth anchovy	Engraulidae	pelagic-neritic	28.7	3.6
Stolephorus holodon	Natal anchovy	Engraulidae	pelagic-neritic	9.8	3.2
Thryssa setirostris	Longjaw thryssa	Engraulidae	pelagic-neritic	22	3.3
Thryssa vitrirostris	Orangemouth anchovy	Engraulidae	pelagic-neritic	20	3.3
Chaetodipterus faber	Atlantic spadefish	Ephippidae	reef-associated	91	4.5
Chaetodipterus lippei	West African spadefish	Ephippidae	demersal	31	3.7
Ephippus goreensis	East Atlantic African spadefish	Ephippidae	demersal	30	3.5
Platax teira	Longfin batfish	Ephippidae	reef-associated	70	4
Tripterodon orbis	African spadefish	Ephippidae	reef-associated	75	3.5
Epigonus constanciae		Epigonidae	bathydemersal	24	3.4
Epigonus denticulatus	Pencil cardinal	Epigonidae	bathydemersal	20	3.3
Epigonus macrops	Luminous deepsea cardinalfish	Epigonidae	bathydemersal	25.9	3.4
Epigonus occidentalis	Western deepsea cardinalfish	Epigonidae	bathydemersal	22.9	3.4
Epigonus oligolepis		Epigonidae	bathydemersal	22.9	3.4
Epigonus pandionis	Bigeye	Epigonidae	bathydemersal	23.7	3.4
Epigonus pectinifer		Epigonidae	bathydemersal	18.9	3.4
Epigonus robustus	Robust cardinalfish	Epigonidae	bathydemersal	22	3.4
Epigonus telescopus	Black cardinal fish	Epigonidae	bathydemersal	75	3.3
Rosenblattia robusta	Stout cardinalfish	Epigonidae	bathypelagic	10	3.3
Sphyraenops bairdianus	Triplespine deepwater cardinalfish	Epigonidae	bathypelagic	21.3	3.4
Esox lucius	Northern pike	Esocidae	demersal	150	4.4
Eurypharynx pelecanoides	Pelican eel	Eurypharyngidae	bathypelagic	100	4.1
Coccorella atlantica	Atlantic sabretooth	Evermannellidae	bathypelagic	22.6	4.3
Evermannella balbo	Balbo sabretooth	Evermannellidae	bathypelagic	20.6	4.2
Odontostomops normalops	Undistinguished sabretooth	Evermannellidae	pelagic-oceanic	15	4.3
Cheilopogon cyanopterus	Margined flyingfish	Exocoetidae	pelagic-oceanic	40	3.3
Cheilopogon exsiliens	Bandwing flyingfish	Exocoetidae	pelagic-oceanic	30	3
Cheilopogon furcatus	Spotfin flyingfish	Exocoetidae	pelagic-oceanic	35	4
Cheilopogon heterurus	Mediterranean flyingfish	Exocoetidae	pelagic-neritic	40	3.4
Cheilopogon hubbsi	Blotchwing flyingfish	Exocoetidae	pelagic-neritic	41	3.7
Cheilopogon melanurus	Atlantic flyingfish	Exocoetidae	pelagic-neritic	32	3.6
Cheilopogon milleri	Guinean flyingfish	Exocoetidae	pelagic-oceanic	34.8	3.6
Cheilopogon nigricans	Blacksail flyingfish	Exocoetidae	pelagic-oceanic	34.2	3
Cheilopogon pinnatibarbatus altipennis	Smallhead flyingfish	Exocoetidae	pelagic-neritic	46.4	3.7
Cheilopogon pinnatibarbatus pinnatibarbatus	Bennett's flyingfish	Exocoetidae	pelagic-neritic	48.8	4
Cypselurus comatus	Clearwing flyingfish	Exocoetidae	pelagic-neritic	30	4
Exocoetus monocirrhus	Barbel flyingfish	Exocoetidae	pelagic-oceanic	24.4	3.1
Exocoetus obtusirostris	Oceanic two-wing flyingfish	Exocoetidae	pelagic-neritic	24	3
Exocoetus volitans	Tropical two-wing flyingfish	Exocoetidae	pelagic-neritic	30	3
Fodiator acutus	Sharpchin flyingfish	Exocoetidae	pelagic-oceanic	18	3.3
Hirundichthys affinis	Fourwing flyingfish	Exocoetidae	pelagic-neritic	30	3.8
Hirundichthys rondeletii	Black wing flyingfish	Exocoetidae	pelagic-oceanic	30	3
Hirundichthys speculiger	Mirrorwing flyingfish	Exocoetidae	pelagic-oceanic	30	3
Parexocoetus brachypterus	Sailfin flyingfish	Exocoetidae	pelagic-neritic	20	3.4
Parexocoetus hillianus	Flyingfish	Exocoetidae	pelagic-neritic	16.7	3.3
Prognichthys gibbifrons	Bluntnose flyingfish	Exocoetidae	pelagic-neritic	23.8	3.4
Fistularia commersonii	Bluespotted cornetfish	Fistulariidae	reef-associated	160	4.3
Fistularia petimba	Red cornetfish	Fistulariidae	reef-associated	200	4.5
Fistularia tabacaria	Cornetfish	Fistulariidae	reef-associated	200	3.5
Adinia xenica	Diamond killifish	Fundulidae	benthopelagic	6	3.1
Fundulus confluentus	Marsh killifish	Fundulidae	benthopelagic	8	3.1
Fundulus grandis	Gulf killifish	Fundulidae	benthopelagic	18	3
Fundulus heteroclitus heteroclitus	Mummichog	Fundulidae	benthopelagic	15	3.6
Fundulus jenkinsi	Saltmarsh topminnow	Fundulidae	benthopelagic	5.5	3.1
Fundulus luciae	Spotfin killifish	Fundulidae	benthopelagic	5	3.1
Fundulus majalis	Striped killifish	Fundulidae	benthopelagic	15	3.1
Fundulus pulvereus	Bayou killifish	Fundulidae	benthopelagic	6.5	3.1
Fundulus similis	Longnose killifish	Fundulidae	benthopelagic	12	3.1
Lucania parva	Rainwater killifish	Fundulidae	pelagic-neritic	5	3.1
Arctogadus glacialis	Arctic cod	Gadidae	bathypelagic	32.5	3.8
Boreogadus saida	Polar cod	Gadidae	demersal	40	3.1
Eleginus nawaga	Navaga	Gadidae	demersal	42	4.2
Gadiculus argenteus	Silvery pout	Gadidae	pelagic-oceanic	15	3.5
Gadiculus thori		Gadidae	pelagic-oceanic	15	3.5
Gadus morhua	Atlantic cod	Gadidae	benthopelagic	200	4.4
Gadus ogac	Greenland cod	Gadidae	demersal	77	3.6
Melanogrammus aeglefinus	Haddock	Gadidae	demersal	112	4.1
Merlangius merlangus	Whiting	Gadidae	benthopelagic	70	4.4
Microgadus tomcod	Atlantic tomcod	Gadidae	demersal	38.1	3.3
Micromesistius australis	Southern blue whiting	Gadidae	benthopelagic	90	3.8
Micromesistius poutassou	Blue whiting	Gadidae	bathypelagic	50	4
Pollachius pollachius	Pollack	Gadidae	benthopelagic	130	4.2
Pollachius virens	Saithe	Gadidae	demersal	130	4.4
Raniceps raninus	Tadpole fish	Gadidae	demersal	27.5	3.8
Theragra finnmarchica	Norwegian pollock	Gadidae	benthopelagic	50	3.8
Trisopterus esmarkii	Norway pout	Gadidae	benthopelagic	35	3.2
Trisopterus luscus	Pouting	Gadidae	benthopelagic	46	3.7
Trisopterus minutus	Poor cod	Gadidae	benthopelagic	40	3.8
Apeltes quadracus	Fourspine stickleback	Gasterosteidae	benthopelagic	6.4	3.2
Gasterosteus aculeatus	Three-spined stickleback	Gasterosteidae	benthopelagic	11	3.5
Gasterosteus wheatlandi	Blackspotted stickleback	Gasterosteidae	benthopelagic	7.6	3.2
Pungitius pungitius	Ninespine stickleback	Gasterosteidae	benthopelagic	9	3.3
Spinachia spinachia	Sea stickleback	Gasterosteidae	benthopelagic	26.8	3.5
Diplospinus multistriatus	Striped escolar	Gempylidae	benthopelagic	40.3	3.5
Epinnula magistralis	Domine	Gempylidae	benthopelagic	122	4.3
Gempylus serpens	Snake mackerel	Gempylidae	pelagic-oceanic	122	4.3
Lepidocybium flavobrunneum	Escolar	Gempylidae	benthopelagic	244	4.3
Nealotus tripes	Black snake mackerel	Gempylidae	bathypelagic	30.5	4.2
Neoepinnula americana	American sackfish	Gempylidae	benthopelagic	26.8	3.8
Neoepinnula orientalis	Sackfish	Gempylidae	benthopelagic	36.6	4.2
Nesiarchus nasutus	Black gemfish	Gempylidae	benthopelagic	158.6	4.3
Paradiplospinus antarcticus	Antarctic escolar	Gempylidae	bathypelagic	63.4	4.1
Paradiplospinus gracilis	Slender escolar	Gempylidae	bathydemersal	63.4	4.5
Promethichthys prometheus	Roudi escolar	Gempylidae	benthopelagic	122	4.2
Ruvettus pretiosus	Oilfish	Gempylidae	benthopelagic	300	4.2
Thyrsites atun	Snoek	Gempylidae	benthopelagic	244	3.7
Thyrsitoides marleyi	Black snoek	Gempylidae	benthopelagic	200	4.2
Thyrsitops lepidopoides	White snake mackerel	Gempylidae	benthopelagic	48.8	3.9
Geotria australis	Pouched lamprey	Geotriidae	demersal	57	4.5
Diapterus auratus	Irish mojarra	Gerreidae	demersal	34	2.4
Diapterus rhombeus	Caitipa mojarra	Gerreidae	demersal	40	2.9
Eucinostomus argenteus	Silver mojarra	Gerreidae	reef-associated	20	3.1
Eucinostomus gula	Jenny mojarra	Gerreidae	reef-associated	23	3.2
Eucinostomus harengulus	Tidewater mojarra	Gerreidae	demersal	21.7	3.3
Eucinostomus havana	Bigeye mojarra	Gerreidae	demersal	18	3.5
Eucinostomus jonesii	Slender mojarra	Gerreidae	demersal	20	3.2
Eucinostomus melanopterus	Flagfin mojarra	Gerreidae	demersal	30	3.4
Eugerres brasilianus	Brazilian mojarra	Gerreidae	demersal	55.5	3.4
Eugerres plumieri	Striped mojarra	Gerreidae	demersal	40	2.2
Gerres cinereus	Yellow fin mojarra	Gerreidae	reef-associated	41	3.3
Gerres longirostris	Strongspine silver-biddy	Gerreidae	reef-associated	44.5	3.5
Gerres methueni	Striped silver biddy	Gerreidae	benthopelagic	30	3.6
Gerres nigri	Guinean striped mojarra	Gerreidae	benthopelagic	20	3.2
Ulaema lefroyi	Mottled mojarra	Gerreidae	reef-associated	23	3.2
Gibberichthys pumilus	Gibberfish	Gibberichthyidae	bathypelagic	11.2	3.1
Gigantactis elsmani		Gigantactinidae	bathypelagic	46.8	4.4
Gigantactis gibbsi		Gigantactinidae	bathypelagic	28.2	4.2
Gigantactis golovani		Gigantactinidae	bathypelagic	28.2	4.2
Gigantactis gracilicauda		Gigantactinidae	bathypelagic	10.7	3.7
Gigantactis herwigi		Gigantactinidae	bathypelagic	32	4.2
Gigantactis ios		Gigantactinidae	bathypelagic	6.9	3.5
Gigantactis kreffti		Gigantactinidae	bathypelagic	30.7	4.2
Gigantactis longicirra		Gigantactinidae	bathypelagic	28.2	4.2
Gigantactis macronema		Gigantactinidae	bathypelagic	43.2	4
Gigantactis microphthalmus		Gigantactinidae	bathypelagic	28.2	4.2
Gigantactis perlatus		Gigantactinidae	bathypelagic	27.2	4.2
Gigantactis vanhoeffeni		Gigantactinidae	bathypelagic	62	4.5
Gigantactis watermani		Gigantactinidae	bathypelagic	28.2	4.2
Rhynchactis leptonema		Gigantactinidae	bathypelagic	12.6	3.8
Rhynchactis macrothrix		Gigantactinidae	bathypelagic	15.9	3.9
Gigantura chuni	Gigantura	Giganturidae	bathypelagic	19	4.2
Gigantura indica	Telescopefish	Giganturidae	bathypelagic	24.8	4
Acyrtops amplicirrus	Flarenostril clingfish	Gobiesocidae	demersal	2.5	3
Acyrtops beryllinus	Emerald clingfish	Gobiesocidae	reef-associated	2.5	3.3
Acyrtus artius	Papillate clingfish	Gobiesocidae	reef-associated	2.8	3.1
Acyrtus rubiginosus	Red clingfish	Gobiesocidae	demersal	3.5	3.3
Apletodon dentatus	Small-headed clingfish	Gobiesocidae	demersal	4.9	3.1
Apletodon incognitus		Gobiesocidae	demersal	3.3	3.2
Apletodon pellegrini	Chubby clingfish	Gobiesocidae	demersal	5	3.3
Arcos macrophthalmus	Padded clingfish	Gobiesocidae	reef-associated	9	3.5
Chorisochismus dentex	Rocksucker	Gobiesocidae	demersal	30	3.2
Derilissus altifrons		Gobiesocidae	demersal	2.1	3
Derilissus nanus		Gobiesocidae	demersal	1.7	3
Diplecogaster bimaculata bimaculata	Two-spotted clingfish	Gobiesocidae	demersal	7.3	3.3
Diplecogaster bimaculata pectoralis		Gobiesocidae	demersal	2.7	3.1
Diplecogaster ctenocrypta		Gobiesocidae	demersal	2	3
Diplecogaster megalops	Bigeye clingfish	Gobiesocidae	demersal	3.4	3.1
Eckloniaichthys scylliorhiniceps	Weedsucker	Gobiesocidae	demersal	3.5	3.2
Gobiesox adustus	Panamic clingfish	Gobiesocidae	reef-associated	4.5	2.9
Gobiesox barbatulus	Lappetlip clingfish	Gobiesocidae	demersal	8	3.2
Gobiesox lucayanus	Bahama skilletfish	Gobiesocidae	demersal	6	3.2
Gobiesox marmoratus		Gobiesocidae	demersal	8.9	3.3
Gobiesox nigripinnis	Blackfinned clingfish	Gobiesocidae	demersal	8.5	3.2
Gobiesox punctulatus	Stippled clingfish	Gobiesocidae	demersal	6.3	3.2
Gobiesox strumosus	Skilletfish	Gobiesocidae	reef-associated	8	3.2
Lecanogaster chrysea		Gobiesocidae	demersal	2.5	3
Lepadogaster candolii	Connemarra clingfish	Gobiesocidae	demersal	9.1	2.8
Lepadogaster purpurea	Cornish sucker	Gobiesocidae	demersal	9.1	3.3
Opeatogenys cadenati		Gobiesocidae	demersal	2.6	3
Tomicodon fasciatus	Barred clingfish	Gobiesocidae	demersal	6.2	3.2
Tomicodon rhabdotus		Gobiesocidae	demersal	4.7	3.2
Akko dionaea		Gobiidae	demersal	9.8	3
Aphia minuta	Transparent goby	Gobiidae	pelagic-neritic	7.9	3.1
Awaous lateristriga	West African freshwater goby	Gobiidae	demersal	26.4	2.2
Barbulifer antennatus	Barbulifer	Gobiidae	demersal	2.4	3
Barbulifer ceuthoecus	Bearded goby	Gobiidae	reef-associated	3	3.1
Bathygobius burtoni		Gobiidae	demersal	8	3.3
Bathygobius casamancus		Gobiidae	demersal	8.1	3.3
Bathygobius cocosensis	Cocos frill-goby	Gobiidae	reef-associated	12.2	3.5
Bathygobius cotticeps	Cheekscaled frill-goby	Gobiidae	reef-associated	11	3.4
Bathygobius curacao	Notchtongue goby	Gobiidae	demersal	7.5	3.3
Bathygobius fuscus	Dusky frillgoby	Gobiidae	reef-associated	12	3.4
Bathygobius laddi	Brownboy goby	Gobiidae	reef-associated	5	3.2
Bathygobius mystacium	Island frillfin	Gobiidae	demersal	15	3.5
Bathygobius niger	Black minigoby	Gobiidae	demersal	6	3.3
Bathygobius soporator	Frillfin goby	Gobiidae	demersal	15	3.5
Bollmannia boqueronensis	White-eye goby	Gobiidae	demersal	10	3.3
Bollmannia communis	Ragged goby	Gobiidae	demersal	14.6	3.3
Buenia jeffreysii	Jeffrey's goby	Gobiidae	demersal	6	3.6
Caffrogobius agulhensis	Agulhas goby	Gobiidae	demersal	7.5	3.3
Caffrogobius caffer		Gobiidae	demersal	18	3
Caffrogobius gilchristi	Prison goby	Gobiidae	demersal	15	3.6
Caffrogobius natalensis	Baldy	Gobiidae	demersal	10.2	3.3
Caffrogobius nudiceps	Barehead goby	Gobiidae	demersal	14	3.4
Caffrogobius saldanha	Commafin goby	Gobiidae	demersal	12	3.3
Chriolepis benthonis	Deepwater goby	Gobiidae	demersal	3	3.1
Chriolepis fisheri	Translucent goby	Gobiidae	reef-associated	2.5	3
Corcyrogobius lubbocki		Gobiidae	demersal	2	3
Coryogalops william	Kaalpens goby	Gobiidae	demersal	6	3.2
Coryphopterus alloides	Barfin goby	Gobiidae	reef-associated	4	2.8
Coryphopterus dicrus	Colon goby	Gobiidae	reef-associated	5	2.7
Coryphopterus eidolon	Pallid goby	Gobiidae	reef-associated	6	2
Coryphopterus glaucofraenum	Bridled goby	Gobiidae	reef-associated	8	2.7
Coryphopterus hyalinus	Glass goby	Gobiidae	reef-associated	2.5	2.9
Coryphopterus lipernes	Peppermint goby	Gobiidae	reef-associated	3	2.9
Coryphopterus personatus	Masked goby	Gobiidae	reef-associated	4	2.7
Coryphopterus punctipectophorus	Spotted goby	Gobiidae	reef-associated	7.5	2.5
Coryphopterus thrix	Bartail goby	Gobiidae	reef-associated	5	2.7
Coryphopterus venezuelae		Gobiidae	demersal	7.5	2.5
Crystallogobius linearis	Crystal goby	Gobiidae	demersal	5.7	3.4
Ctenogobius boleosoma	Darter goby	Gobiidae	reef-associated	7.5	3.3
Ctenogobius fasciatus	Blotchcheek goby	Gobiidae	demersal	7.7	3.4
Ctenogobius lepturus		Gobiidae	demersal	6	3.3
Ctenogobius pseudofasciatus	Slashcheek goby	Gobiidae	demersal	6.5	3.3
Ctenogobius saepepallens	Dash goby	Gobiidae	reef-associated	5	3.3
Ctenogobius smaragdus	Emerald goby	Gobiidae	demersal	15	3.6
Ctenogobius stigmaticus	Marked goby	Gobiidae	demersal	8	3.4
Ctenogobius stigmaturus	Spottail goby	Gobiidae	demersal	6.5	3.3
Ctenogobius thoropsis	Sperm goby	Gobiidae	demersal	5.4	3.2
Deltentosteus collonianus	Toothed goby	Gobiidae	demersal	7	3.5
Deltentosteus quadrimaculatus	Four-spotted goby	Gobiidae	demersal	8	3.1
Didogobius kochi		Gobiidae	demersal	7.1	3.3
Elacatinus atronasus		Gobiidae	reef-associated	3.8	3.4
Elacatinus chancei	Shortstripe goby	Gobiidae	reef-associated	5	3.5
Elacatinus dilepis	Orangesided goby	Gobiidae	reef-associated	2.5	3.1
Elacatinus evelynae	Sharknose goby	Gobiidae	reef-associated	4	3.4
Elacatinus figaro	Barber goby	Gobiidae	reef-associated	4.1	3.4
Elacatinus gemmatus	Frecklefin goby	Gobiidae	reef-associated	2.5	3.1
Elacatinus genie	Cleaner goby	Gobiidae	reef-associated	4.5	3.4
Elacatinus horsti	Yellowline goby	Gobiidae	reef-associated	5	3.5
Elacatinus illecebrosus	Barsnout goby	Gobiidae	reef-associated	4	3.4
Elacatinus lori		Gobiidae	reef-associated	5.6	3.6
Elacatinus louisae	Spotlight goby	Gobiidae	reef-associated	3.8	3.3
Elacatinus multifasciatus	Greenbanded goby	Gobiidae	reef-associated	5	3.5
Elacatinus oceanops	Neon goby	Gobiidae	reef-associated	5	3.5
Elacatinus pallens	Semiscaled goby	Gobiidae	demersal	1.9	3
Elacatinus prochilos	Broadstripe goby	Gobiidae	reef-associated	4	3.2
Elacatinus randalli	Yellownose goby	Gobiidae	reef-associated	4.6	3.5
Elacatinus xanthiprora	Yellowprow goby	Gobiidae	reef-associated	4	3.4
Elacatinus zebrellus	Zebrette goby	Gobiidae	reef-associated	3.8	3.4
Evermannichthys metzelaari	Sponge goby	Gobiidae	demersal	3.7	3.1
Evorthodus lyricus	Lyre goby	Gobiidae	demersal	15	3.4
Ginsburgellus novemlineatus	Nineline goby	Gobiidae	reef-associated	2.5	3
Glossogobius giuris	Tank goby	Gobiidae	benthopelagic	61	3.8
Gnatholepis thompsoni	Goldspot goby	Gobiidae	reef-associated	8.2	2.3
Gobioides africanus		Gobiidae	demersal	12.9	3.4
Gobioides broussonnetii	Violet goby	Gobiidae	demersal	55.3	3.7
Gobioides grahamae		Gobiidae	demersal	21.1	3.5
Gobionellus munizi		Gobiidae	demersal	17.1	3.4
Gobionellus occidentalis		Gobiidae	demersal	13.2	3.4
Gobionellus oceanicus	Highfin goby	Gobiidae	demersal	30	3.5
Gobionellus stomatus		Gobiidae	demersal	17.1	3.4
Gobiosoma bosc	Naked goby	Gobiidae	demersal	6	3.2
Gobiosoma ginsburgi	Seaboard goby	Gobiidae	demersal	6	3.2
Gobiosoma grosvenori	Rockcut goby	Gobiidae	reef-associated	3	3.1
Gobiosoma hildebrandi		Gobiidae	demersal	4.8	3.2
Gobiosoma longipala	Twoscale goby	Gobiidae	demersal	5	3.2
Gobiosoma robustum	Code goby	Gobiidae	demersal	5	3.2
Gobiosoma spes	Vermiculated goby	Gobiidae	reef-associated	4.1	3.1
Gobius auratus	Golden goby	Gobiidae	demersal	10	3
Gobius bucchichi	Bucchich's goby	Gobiidae	demersal	10	3.1
Gobius cobitis	Giant goby	Gobiidae	demersal	27	3
Gobius couchi	Couch's goby	Gobiidae	demersal	7.7	2.9
Gobius cruentatus	Red-mouthed goby	Gobiidae	demersal	18	3.1
Gobius fallax	Sarato's goby	Gobiidae	demersal	9	3.3
Gobius gasteveni	Steven's goby	Gobiidae	demersal	12	3.1
Gobius niger	Black goby	Gobiidae	demersal	18	3.2
Gobius paganellus	Rock goby	Gobiidae	demersal	12	3.3
Gobius roulei	Roule's goby	Gobiidae	bathydemersal	8	3.1
Gobius rubropunctatus		Gobiidae	demersal	8	3.1
Gobius senegambiensis		Gobiidae	demersal	8.9	3.1
Gobius tropicus		Gobiidae	demersal	11.7	3.1
Gobius xanthocephalus		Gobiidae	demersal	10	3.1
Gobiusculus flavescens	Two-spotted goby	Gobiidae	demersal	6	3.2
Gobulus myersi	Paleback goby	Gobiidae	reef-associated	15	3.4
Gorogobius nigricinctus		Gobiidae	demersal	4	3.1
Hetereleotris zonata	Goggles	Gobiidae	demersal	6.5	3.2
Lebetus guilleti	Guillet's goby	Gobiidae	reef-associated	3	3.1
Lebetus scorpioides	Diminutive goby	Gobiidae	reef-associated	4.9	3.2
Lesueurigobius friesii	Fries's goby	Gobiidae	demersal	13	3.2
Lesueurigobius heterofasciatus		Gobiidae	demersal	4.4	3.3
Lesueurigobius koumansi		Gobiidae	demersal	11	3.6
Lesueurigobius sanzi	Sanzo's goby	Gobiidae	demersal	11	3.6
Lophogobius cyprinoides	Crested goby	Gobiidae	demersal	10	3.3
Lythrypnus crocodilus	Mahogany goby	Gobiidae	reef-associated	3.2	3.2
Lythrypnus elasson	Dwarf goby	Gobiidae	reef-associated	1.9	3
Lythrypnus heterochroma	Diphasic goby	Gobiidae	reef-associated	2.5	3.1
Lythrypnus mowbrayi		Gobiidae	reef-associated	3.2	3.2
Lythrypnus nesiotes	Island goby	Gobiidae	reef-associated	2	3
Lythrypnus okapia	Okapi goby	Gobiidae	reef-associated	1.4	2.8
Lythrypnus phorellus	Convict goby	Gobiidae	reef-associated	2	3
Lythrypnus spilus	Bluegold goby	Gobiidae	reef-associated	2.5	3.1
Mauligobius maderensis		Gobiidae	demersal	15	3.4
Mauligobius nigri		Gobiidae	demersal	8.7	3.3
Microgobius carri	Seminole goby	Gobiidae	reef-associated	12.2	3
Microgobius gulosus	Clown goby	Gobiidae	demersal	7.5	2.4
Microgobius meeki		Gobiidae	demersal	12.2	3.5
Microgobius microlepis	Banner goby	Gobiidae	reef-associated	12.2	3
Microgobius signatus		Gobiidae	demersal	6	3
Microgobius thalassinus	Green goby	Gobiidae	demersal	6.4	3
Myersina pretoriusi	Pondoland sailfin goby	Gobiidae	demersal	7.5	3.3
Nematogobius brachynemus		Gobiidae	demersal	5.7	3.2
Nematogobius maindroni		Gobiidae	demersal	8	3.3
Neogobius melanostomus	Round goby	Gobiidae	demersal	24.6	3.2
Nes longus	Orangespotted goby	Gobiidae	reef-associated	10	3.4
Oxyurichthys microlepis	Maned goby	Gobiidae	demersal	13.5	3.7
Oxyurichthys stigmalophius	Spotfin goby	Gobiidae	reef-associated	16.5	3.8
Palatogobius paradoxus	Mauve goby	Gobiidae	demersal	3.5	3.1
Periophthalmus argentilineatus	Barred mudskipper	Gobiidae	reef-associated	19	3.3
Periophthalmus barbarus	Atlantic mudskipper	Gobiidae	reef-associated	25	3.2
Periophthalmus kalolo	Common mudskipper	Gobiidae	reef-associated	17.2	3.3
Pomatoschistus lozanoi	Lozano's goby	Gobiidae	demersal	8	3.1
Pomatoschistus marmoratus	Marbled goby	Gobiidae	demersal	8	3.3
Pomatoschistus microps	Common goby	Gobiidae	demersal	9	3.3
Pomatoschistus minutus	Sand goby	Gobiidae	demersal	11	3.2
Pomatoschistus norvegicus	Norway goby	Gobiidae	demersal	8	3.5
Pomatoschistus pictus	Painted goby	Gobiidae	demersal	6	3.1
Porogobius schlegelii		Gobiidae	demersal	14.9	2.9
Priolepis cincta	Girdled goby	Gobiidae	reef-associated	7.8	3.3
Priolepis dawsoni		Gobiidae	reef-associated	3.2	3.1
Priolepis hipoliti	Rusty goby	Gobiidae	reef-associated	4	3.5
Priolepis robinsi		Gobiidae	demersal	5	3.2
Psammogobius biocellatus	Sleepy goby	Gobiidae	benthopelagic	12	3.3
Psammogobius knysnaensis	Knysna sandgoby	Gobiidae	demersal	7	3.3
Psilotris alepis	Scaleless goby	Gobiidae	reef-associated	2.9	3.1
Psilotris batrachodes	Toadfish goby	Gobiidae	reef-associated	2.3	3
Psilotris boehlkei		Gobiidae	demersal	4.9	3.1
Psilotris celsa	Highspine goby	Gobiidae	reef-associated	6.2	3.2
Psilotris kaufmani		Gobiidae	demersal	4.9	3.1
Risor ruber	Tusked goby	Gobiidae	reef-associated	2.5	3
Sicydium plumieri	Sirajo	Gobiidae	benthopelagic	11	2.1
Sicydium punctatum	Spotted algae-eating goby	Gobiidae	demersal	9.8	2.2
Sufflogobius bibarbatus	Pelagic goby	Gobiidae	demersal	17	2.8
Taenioides esquivel	Bulldog eelgoby	Gobiidae	demersal	29.2	3.8
Thorogobius angolensis		Gobiidae	demersal	13.1	3.4
Thorogobius ephippiatus	Leopard-spotted goby	Gobiidae	demersal	13	3
Thorogobius rofeni		Gobiidae	bathydemersal	8.5	3.3
Tigrigobius macrodon	Tiger goby	Gobiidae	reef-associated	5	3.5
Vanneaugobius canariensis		Gobiidae	demersal	4.3	3.2
Vanneaugobius dollfusi		Gobiidae	demersal	4.1	3.1
Vanneaugobius pruvoti		Gobiidae	demersal	3.9	3.1
Varicus imswe	Whiteband goby	Gobiidae	demersal	1.7	3
Varicus marilynae	Orangebelly goby	Gobiidae	demersal	3	3
Vomerogobius flavus	Lemon Goby	Gobiidae	demersal	8	3.3
Wheelerigobius maltzani		Gobiidae	demersal	4.5	3.2
Wheelerigobius wirtzi	Cameroon goby	Gobiidae	demersal	4.3	3.2
Gonorynchus gonorynchus	Beaked salmon	Gonorynchidae	demersal	60	3.3
Bonapartia pedaliota	Longray fangjaw	Gonostomatidae	bathypelagic	8.8	3.4
Cyclothone acclinidens	Benttooth bristlemouth	Gonostomatidae	bathypelagic	7.9	3.5
Cyclothone alba	Bristlemouth	Gonostomatidae	bathypelagic	4.2	3.1
Cyclothone braueri	Garrick	Gonostomatidae	bathypelagic	4.6	3.1
Cyclothone kobayashii	Kobayashi's bristlemouth	Gonostomatidae	bathydemersal	5.1	3.1
Cyclothone livida		Gonostomatidae	bathypelagic	6.1	3.1
Cyclothone microdon	Veiled anglemouth	Gonostomatidae	bathypelagic	7.6	3
Cyclothone obscura	Hidden bristlemouth	Gonostomatidae	bathypelagic	8.1	3.1
Cyclothone pallida	Tan bristlemouth	Gonostomatidae	bathypelagic	9.1	3.2
Cyclothone parapallida	Shadow bristlemouth	Gonostomatidae	bathypelagic	8.1	3.1
Cyclothone pseudopallida	Slender bristlemouth	Gonostomatidae	bathypelagic	7.1	3.1
Diplophos australis		Gonostomatidae	bathypelagic	22	3.3
Diplophos rebainsi	Rebains' portholefish	Gonostomatidae	bathypelagic	25	3.3
Diplophos taenia	Pacific portholefish	Gonostomatidae	bathypelagic	33.7	3.2
Gonostoma atlanticum	Atlantic fangjaw	Gonostomatidae	bathypelagic	8.1	3
Gonostoma denudatum		Gonostomatidae	bathypelagic	17.1	3.3
Gonostoma elongatum	Elongated bristlemouth fish	Gonostomatidae	bathypelagic	27.5	3.3
Manducus maderensis		Gonostomatidae	bathypelagic	34	3.5
Margrethia obtusirostra	Bighead portholefish	Gonostomatidae	bathypelagic	10.1	3.5
Margrethia valentinae		Gonostomatidae	bathypelagic	7.2	3.2
Sigmops bathyphilus	Spark anglemouth	Gonostomatidae	bathypelagic	24.4	3.5
Triplophos hemingi		Gonostomatidae	bathypelagic	43.9	3.4
Gramma brasiliensis	Brazilian basslet	Grammatidae	reef-associated	8	3.4
Gramma linki	Yellowlined basslet	Grammatidae	reef-associated	7	3.4
Gramma loreto	Royal gramma	Grammatidae	reef-associated	8	3.3
Gramma melacara	Blackcap basslet	Grammatidae	reef-associated	10	3.5
Lipogramma anabantoides	Dusky basslet	Grammatidae	reef-associated	1.6	2.9
Lipogramma evides	Banded basslet	Grammatidae	bathydemersal	4	3.2
Lipogramma flavescens	Yellow basslet	Grammatidae	bathydemersal	2.7	3.1
Lipogramma klayi	Bicolor basslet	Grammatidae	reef-associated	4	3.2
Lipogramma regia	Royal basslet	Grammatidae	demersal	2.5	3.1
Lipogramma robinsi	Yellowbar basslet	Grammatidae	bathydemersal	2.7	3.1
Lipogramma rosea	Rosy basslet	Grammatidae	reef-associated	5.9	3.3
Lipogramma trilineata	Threeline basslet	Grammatidae	demersal	3.5	3.2
Grammicolepis brachiusculus	Thorny tinselfish	Grammicolepididae	bathypelagic	64	4.3
Xenolepidichthys dalgleishi	Spotted tinselfish	Grammicolepididae	benthopelagic	15	3.7
Anisotremus moricandi	Brownstriped grunt	Haemulidae	demersal	18.5	3.3
Anisotremus surinamensis	Black margate	Haemulidae	reef-associated	76	3.3
Anisotremus virginicus	Porkfish	Haemulidae	reef-associated	40.6	3.4
Boridia grossidens	Borriqueta porgy	Haemulidae	demersal	47.1	3.5
Brachydeuterus auritus	Bigeye grunt	Haemulidae	benthopelagic	30	3
Conodon nobilis	Barred grunt	Haemulidae	demersal	33.6	3.5
Emmelichthyops atlanticus	Bonnetmouth	Haemulidae	reef-associated	13	3.9
Genyatremus luteus	Torroto grunt	Haemulidae	demersal	37	3.5
Haemulon album	White margate	Haemulidae	reef-associated	79	3.2
Haemulon aurolineatum	Tomtate grunt	Haemulidae	reef-associated	25	3.2
Haemulon bonariense	Black grunt	Haemulidae	reef-associated	40	3.5
Haemulon boschmae	Bronzestripe grunt	Haemulidae	reef-associated	19	3.5
Haemulon carbonarium	Caesar grunt	Haemulidae	reef-associated	36	3.3
Haemulon chrysargyreum	Smallmouth grunt	Haemulidae	reef-associated	23	3.3
Haemulon flavolineatum	French grunt	Haemulidae	reef-associated	30	3.3
Haemulon macrostomum	Spanish grunt	Haemulidae	reef-associated	43	3.3
Haemulon melanurum	Cottonwick grunt	Haemulidae	reef-associated	33	2.2
Haemulon parra	Sailor's grunt	Haemulidae	reef-associated	41.2	3.5
Haemulon plumierii	White grunt	Haemulidae	reef-associated	53	3.6
Haemulon sciurus	Bluestriped grunt	Haemulidae	reef-associated	46	3.4
Haemulon squamipinna		Haemulidae	benthopelagic	14	3.3
Haemulon steindachneri	Chere-chere grunt	Haemulidae	reef-associated	30	3.5
Haemulon striatum	Striped grunt	Haemulidae	reef-associated	28	3.4
Haemulon vittatum	Boga	Haemulidae	reef-associated	23	3.2
Orthopristis chrysoptera	Pigfish	Haemulidae	demersal	56.1	3.4
Orthopristis ruber	Corocoro grunt	Haemulidae	demersal	40	3.5
Parakuhlia macrophthalmus	Dara	Haemulidae	demersal	20	3.4
Parapristipoma humile	Guinean grunt	Haemulidae	demersal	37	3.5
Parapristipoma octolineatum	African striped grunt	Haemulidae	demersal	61	3.5
Plectorhinchus chubbi	Dusky rubberlip	Haemulidae	reef-associated	75	3.8
Plectorhinchus flavomaculatus	Lemonfish	Haemulidae	reef-associated	60	4
Plectorhinchus macrolepis	Biglip grunt	Haemulidae	benthopelagic	45	3.7
Plectorhinchus mediterraneus	Rubberlip grunt	Haemulidae	demersal	97.6	3.5
Plectorhinchus schotaf	Minstrel sweetlips	Haemulidae	reef-associated	80	3.8
Plectorhinchus sordidus	Sordid rubberlip	Haemulidae	reef-associated	60	4
Pomadasys corvinaeformis	Roughneck grunt	Haemulidae	demersal	25	3.4
Pomadasys crocro	Burro grunt	Haemulidae	demersal	38	4
Pomadasys incisus	Bastard grunt	Haemulidae	demersal	50	3.8
Pomadasys jubelini	Sompat grunt	Haemulidae	demersal	60	3.3
Pomadasys kaakan	Javelin grunter	Haemulidae	reef-associated	80	3.5
Pomadasys olivaceus	Olive grunt	Haemulidae	reef-associated	55	2.6
Pomadasys perotaei	Parrot grunt	Haemulidae	benthopelagic	36	3.3
Pomadasys rogerii	Pigsnout grunt	Haemulidae	benthopelagic	60	3.5
Pomadasys striatus	Striped grunter	Haemulidae	benthopelagic	22	3.4
Pomadasys suillus		Haemulidae	reef-associated	40	3.5
Aldrovandia affinis	Gilbert's halosaurid fish	Halosauridae	benthopelagic	55	3.3
Aldrovandia gracilis		Halosauridae	bathypelagic	55	3.3
Aldrovandia oleosa		Halosauridae	bathypelagic	52	3.1
Aldrovandia phalacra	Hawaiian halosaurid fish	Halosauridae	benthopelagic	50	3.2
Aldrovandia rostrata		Halosauridae	bathypelagic	50.8	3.5
Halosauropsis macrochir	Abyssal halosaur	Halosauridae	bathydemersal	90	3.3
Halosaurus attenuatus		Halosauridae	bathypelagic	40.6	3.3
Halosaurus guentheri		Halosauridae	bathypelagic	60	3.4
Halosaurus johnsonianus	Halosaur	Halosauridae	bathydemersal	50	3.1
Halosaurus ovenii		Halosauridae	bathydemersal	60	3.5
Harpagifer antarcticus	Antarctic spiny plunderfish	Harpagiferidae	demersal	11.6	3.3
Harpagifer bispinis	Magellan plunderfish	Harpagiferidae	demersal	8.5	3.3
Harpagifer georgianus	South Georgia spiny plunderfish	Harpagiferidae	demersal	8.5	3.3
Harpagifer palliolatus	Crested spiny plunderfish	Harpagiferidae	demersal	9.3	3.3
Chriodorus atherinoides	Hardhead halfbeak	Hemiramphidae	pelagic-neritic	25	3
Euleptorhamphus velox	Flying halfbeak	Hemiramphidae	pelagic-oceanic	61	3
Euleptorhamphus viridis	Ribbon halfbeak	Hemiramphidae	pelagic-oceanic	53	3.4
Hemiramphus balao	Balao halfbeak	Hemiramphidae	reef-associated	40	3.6
Hemiramphus bermudensis	Bermuda halfbeak	Hemiramphidae	pelagic-neritic	44	3.3
Hemiramphus brasiliensis	Ballyhoo halfbeak	Hemiramphidae	reef-associated	55	2.5
Hemiramphus far	Black-barred halfbeak	Hemiramphidae	reef-associated	45	2.9
Hyporhamphus capensis	Cape halfbeak	Hemiramphidae	pelagic-neritic	16	2.1
Hyporhamphus meeki	American halfbeak	Hemiramphidae	pelagic-neritic	22	2.8
Hyporhamphus picarti	African halfbeak	Hemiramphidae	benthopelagic	20	2
Hyporhamphus roberti hildebrandi	Central American halfbeak	Hemiramphidae	pelagic-neritic	22.7	3
Hyporhamphus roberti roberti	Slender halfbeak	Hemiramphidae	pelagic-neritic	32	3
Hyporhamphus unifasciatus	Common halfbeak	Hemiramphidae	reef-associated	30	2
Oxyporhamphus micropterus micropterus	Bigwing halfbeak	Hemiramphidae	pelagic-oceanic	22.6	3.1
Oxyporhamphus micropterus similis	False halfbeak	Hemiramphidae	pelagic-neritic	22	3
Hemitripterus americanus	Sea raven	Hemitripteridae	demersal	64	4.5
Panturichthys isognathus		Heterenchelyidae	demersal	32.5	3.6
Panturichthys longus	Slender shortfaced eel	Heterenchelyidae	demersal	149	4
Panturichthys mauritanicus	Mauritanian shortface eel	Heterenchelyidae	demersal	84	3.2
Pythonichthys macrurus	Longtailed shortfaced eel	Heterenchelyidae	demersal	80	3.8
Pythonichthys microphthalmus	Shorttailed shortfaced eel	Heterenchelyidae	demersal	50.5	3.7
Pythonichthys sanguineus		Heterenchelyidae	reef-associated	41.9	3.7
Himantolophus albinares		Himantolophidae	bathypelagic	23.2	4.2
Himantolophus compressus		Himantolophidae	bathypelagic	15.9	4.3
Himantolophus crinitus		Himantolophidae	bathypelagic	10.1	4.5
Himantolophus groenlandicus	Atlantic footballfish	Himantolophidae	bathypelagic	73.2	4.3
Himantolophus macroceras		Himantolophidae	bathypelagic	11.2	4.5
Himantolophus macroceratoides		Himantolophidae	bathypelagic	21.4	4.3
Himantolophus mauli		Himantolophidae	bathypelagic	26.2	4.3
Himantolophus paucifilosus		Himantolophidae	bathypelagic	21.4	4.3
Corniger spinosus	Spinycheek soldierfish	Holocentridae	demersal	20	3.6
Holocentrus adscensionis	Squirrelfish	Holocentridae	reef-associated	61	3.5
Holocentrus rufus	Longspine squirrelfish	Holocentridae	reef-associated	35	3.5
Myripristis jacobus	Blackbar soldierfish	Holocentridae	reef-associated	25	3.6
Neoniphon marianus	Longjaw squirrelfish	Holocentridae	reef-associated	18	3.6
Ostichthys trachypoma	Bigeye soldierfish	Holocentridae	demersal	20	3.8
Plectrypops retrospinis	Cardinal soldierfish	Holocentridae	reef-associated	15	3.3
Sargocentron bullisi	Deepwater squirrelfish	Holocentridae	reef-associated	15.9	3.5
Sargocentron coruscum	Reef squirrelfish	Holocentridae	reef-associated	15	3.6
Sargocentron diadema	Crown squirrelfish	Holocentridae	reef-associated	17	3.4
Sargocentron hastatum	Red squirrelfish	Holocentridae	reef-associated	25	3.5
Sargocentron poco	Saddle squirrelfish	Holocentridae	reef-associated	11	3.4
Sargocentron punctatissimum	Speckled squirrelfish	Holocentridae	reef-associated	23	3.4
Sargocentron vexillarium	Dusky squirrelfish	Holocentridae	reef-associated	18	3.5
Howella brodiei	Pelagic basslet	Howellidae	bathypelagic	7.6	3.2
Howella sherborni	Sherborn's pelagic bass	Howellidae	bathypelagic	8	3.1
Bathymicrops regis		Ipnopidae	bathydemersal	14.3	3.5
Bathypterois atricolor	Attenuated spider fish	Ipnopidae	bathydemersal	24.9	3.4
Bathypterois dubius	Mediterranean spiderfish	Ipnopidae	bathydemersal	25	3.2
Bathypterois filiferus		Ipnopidae	bathydemersal	26	3.4
Bathypterois grallator	Tripodfish	Ipnopidae	bathydemersal	44.9	3.1
Bathypterois longipes	Abyssal spiderfish	Ipnopidae	bathydemersal	30.4	3.1
Bathypterois perceptor		Ipnopidae	bathydemersal	16	3.3
Bathypterois phenax	Blackfin spiderfish	Ipnopidae	bathydemersal	22	3.4
Bathypterois quadrifilis		Ipnopidae	bathydemersal	22	3.4
Bathypterois viridensis		Ipnopidae	bathydemersal	27.1	3.4
Bathysauropsis gracilis	Black lizardfish	Ipnopidae	bathydemersal	32	4.1
Bathytyphlops marionae	Marion's spiderfish	Ipnopidae	bathydemersal	46.4	3.3
Bathytyphlops sewelli		Ipnopidae	bathydemersal	35	3.1
Ipnops agassizii	Grideye fish	Ipnopidae	bathydemersal	17.7	3.3
Ipnops murrayi		Ipnopidae	bathydemersal	16.1	3.1
Iso natalensis	Surf sprite	Isonidae	pelagic-neritic	8	3.3
Istiompax indica	Black marlin	Istiophoridae	pelagic-oceanic	516.2	4.5
Istiophorus albicans	Atlantic sailfish	Istiophoridae	pelagic-oceanic	315	4.5
Istiophorus platypterus	Indo-Pacific sailfish	Istiophoridae	pelagic-oceanic	386.3	4.5
Kajikia albida	Atlantic white marlin	Istiophoridae	pelagic-oceanic	300	4.5
Kajikia audax	Striped marlin	Istiophoridae	pelagic-oceanic	420	4.6
Makaira nigricans	Blue marlin	Istiophoridae	pelagic-oceanic	500	4.5
Tetrapturus angustirostris	Shortbill spearfish	Istiophoridae	pelagic-oceanic	230	4.5
Tetrapturus georgii	Roundscale spearfish	Istiophoridae	pelagic-oceanic	204.2	4.4
Tetrapturus pfluegeri	Longbill spearfish	Istiophoridae	pelagic-oceanic	281.9	4.3
Girella stuebeli		Kyphosidae	benthopelagic	24	2
Girella zonata		Kyphosidae	benthopelagic	21	2
Kyphosus incisor	Yellow sea chub	Kyphosidae	reef-associated	109.8	2
Kyphosus sectatrix	Bermuda sea chub	Kyphosidae	reef-associated	76	2
Kyphosus vaigiensis	Brassy chub	Kyphosidae	reef-associated	70	2
Neoscorpis lithophilus	Stone-bream	Kyphosidae	demersal	61	2.8
Acantholabrus palloni	Scale-rayed wrasse	Labridae	reef-associated	25	3.5
Anampses caeruleopunctatus	Bluespotted wrasse	Labridae	reef-associated	42	3.3
Anchichoerops natalensis	Natal wrasse	Labridae	reef-associated	75	3.4
Bodianus insularis	Island hogfish	Labridae	reef-associated	33	3.5
Bodianus pulchellus	Spotfin hogfish	Labridae	reef-associated	28.5	3.5
Bodianus rufus	Spanish hogfish	Labridae	reef-associated	40	3.4
Bodianus scrofa	Barred hogfish	Labridae	reef-associated	43	3.5
Bodianus speciosus	Blackbar hogfish	Labridae	reef-associated	61	3.6
Centrolabrus caeruleus		Labridae	demersal	26.2	3.6
Centrolabrus exoletus	Rock cook	Labridae	reef-associated	18	3.5
Centrolabrus trutta	Emerald wrasse	Labridae	reef-associated	18	3.5
Clepticus brasiliensis		Labridae	demersal	30	3.5
Clepticus parrae	Creole wrasse	Labridae	reef-associated	30	3.3
Coris caudimacula	Spottail coris	Labridae	reef-associated	20	3.4
Coris julis	Mediterranean rainbow wrasse	Labridae	reef-associated	36.6	3.2
Ctenolabrus rupestris	Goldsinny-wrasse	Labridae	reef-associated	18	3.3
Decodon puellaris	Red hogfish	Labridae	reef-associated	30	3.5
Doratonotus megalepis	Dwarf wrasse	Labridae	reef-associated	9.4	3.3
Halichoeres bathyphilus	Greenband wrasse	Labridae	reef-associated	23	3.5
Halichoeres bivittatus	Slippery dick	Labridae	reef-associated	35	3.3
Halichoeres brasiliensis	Brazilian wrasse	Labridae	reef-associated	48.2	3.4
Halichoeres caudalis	Painted wrasse	Labridae	reef-associated	20	3.5
Halichoeres cyanocephalus	Yellowcheek wrasse	Labridae	reef-associated	30	3.6
Halichoeres dimidiatus		Labridae	reef-associated	17	3.4
Halichoeres garnoti	Yellowhead wrasse	Labridae	reef-associated	19.3	3.5
Halichoeres maculipinna	Clown wrasse	Labridae	reef-associated	18	3.3
Halichoeres nebulosus	Nebulous wrasse	Labridae	reef-associated	12	3.4
Halichoeres penrosei		Labridae	reef-associated	6.8	3.3
Halichoeres pictus	Rainbow wrasse	Labridae	reef-associated	13	3.5
Halichoeres poeyi	Blackear wrasse	Labridae	reef-associated	20	3.4
Halichoeres radiatus	Puddingwife wrasse	Labridae	reef-associated	51	3.3
Labroides dimidiatus	Bluestreak cleaner wrasse	Labridae	reef-associated	14	3.5
Labrus bergylta	Ballan wrasse	Labridae	reef-associated	65.9	3.1
Labrus merula	Brown wrasse	Labridae	reef-associated	54.9	3.2
Labrus mixtus	Cuckoo wrasse	Labridae	reef-associated	48.8	3.9
Labrus viridis		Labridae	reef-associated	57.3	3.8
Lachnolaimus maximus	Hogfish	Labridae	reef-associated	91	3.9
Lappanella fasciata		Labridae	reef-associated	18.3	3.3
Lappanella guineensis		Labridae	reef-associated	14.4	3.4
Stethojulis interrupta	Cutribbon wrasse	Labridae	reef-associated	13	3.5
Stethojulis strigiventer	Three-ribbon wrasse	Labridae	reef-associated	15	3.2
Symphodus bailloni	Baillon's wrasse	Labridae	reef-associated	24.4	3.3
Symphodus cinereus	Grey wrasse	Labridae	demersal	16	3.3
Symphodus mediterraneus	Axillary wrasse	Labridae	demersal	22	3.1
Symphodus melops	Corkwing wrasse	Labridae	reef-associated	34.2	3.2
Symphodus ocellatus		Labridae	reef-associated	14.6	3.3
Symphodus roissali	Five-spotted wrasse	Labridae	reef-associated	20.7	3.5
Symphodus tinca	East Atlantic peacock wrasse	Labridae	reef-associated	53.7	3.1
Tautoga onitis	Tautog	Labridae	reef-associated	91	3.3
Tautogolabrus adspersus	Cunner	Labridae	reef-associated	38	3.5
Thalassoma ascensionis	Greenfish	Labridae	reef-associated	12.2	3.3
Thalassoma bifasciatum	Bluehead	Labridae	reef-associated	25	3.3
Thalassoma hebraicum	Goldbar wrasse	Labridae	reef-associated	23	3.5
Thalassoma lunare	Moon wrasse	Labridae	reef-associated	45	3.5
Thalassoma noronhanum	Noronha wrasse	Labridae	reef-associated	16.2	3.4
Thalassoma pavo	Ornate wrasse	Labridae	reef-associated	30.5	3.5
Thalassoma purpureum	Surge wrasse	Labridae	reef-associated	46	3.6
Xyrichtys blanchardi	Marmalade Razorfish	Labridae	demersal	25.9	3.3
Xyrichtys martinicensis	Rosy razorfish	Labridae	reef-associated	15	3.5
Xyrichtys novacula	Pearly razorfish	Labridae	reef-associated	38	3.1
Xyrichtys sanctaehelenae	Yellow razorfish	Labridae	demersal	28.4	3.3
Xyrichtys splendens	Green razorfish	Labridae	reef-associated	17.5	3.1
Labrisomus albigenys	Whitecheek blenny	Labrisomidae	reef-associated	13.4	3.5
Labrisomus bucciferus	Puffcheek blenny	Labrisomidae	reef-associated	9	3.4
Labrisomus filamentosus	Quillfin blenny	Labrisomidae	reef-associated	12	3.5
Labrisomus gobio	Palehead blenny	Labrisomidae	reef-associated	6.5	3.3
Labrisomus guppyi	Mimic blenny	Labrisomidae	reef-associated	11.5	3.5
Labrisomus haitiensis	Longfin blenny	Labrisomidae	demersal	7.5	3.3
Labrisomus kalisherae	Downy blenny	Labrisomidae	reef-associated	7.5	3.4
Labrisomus nigricinctus	Spotcheek blenny	Labrisomidae	reef-associated	8	3.4
Labrisomus nuchipinnis	Hairy blenny	Labrisomidae	reef-associated	23	3.5
Malacoctenus africanus		Labrisomidae	demersal	7.3	3.5
Malacoctenus aurolineatus	Goldline blenny	Labrisomidae	reef-associated	6	3.2
Malacoctenus boehlkei	Diamond blenny	Labrisomidae	reef-associated	6.4	3.4
Malacoctenus delalandii		Labrisomidae	reef-associated	8.2	3.3
Malacoctenus erdmani		Labrisomidae	reef-associated	3.8	3.2
Malacoctenus gilli	Dusky blenny	Labrisomidae	reef-associated	7.6	3.5
Malacoctenus macropus	Rosy blenny	Labrisomidae	reef-associated	5.5	3.3
Malacoctenus triangulatus	Saddled blenny	Labrisomidae	reef-associated	7.5	3.5
Malacoctenus versicolor	Barfin blenny	Labrisomidae	reef-associated	7.6	3.1
Nemaclinus atelestos	Threadfin blenny	Labrisomidae	benthopelagic	7.4	3.5
Paraclinus barbatus	Goatee blenny	Labrisomidae	reef-associated	3.4	3.2
Paraclinus cingulatus	Coral blenny	Labrisomidae	reef-associated	3	3.2
Paraclinus fasciatus	Banded blenny	Labrisomidae	reef-associated	6.5	3.5
Paraclinus grandicomis	Horned blenny	Labrisomidae	reef-associated	4	3.3
Paraclinus infrons	Bald blenny	Labrisomidae	reef-associated	3	3.2
Paraclinus marmoratus	Marbled blenny	Labrisomidae	reef-associated	10	3.7
Paraclinus naeorhegmis	Surf blenny	Labrisomidae	demersal	2.7	3.1
Paraclinus nigripinnis	Blackfin blenny	Labrisomidae	reef-associated	6.5	3.5
Starksia atlantica	Smooth-eye blenny	Labrisomidae	reef-associated	2.5	3.1
Starksia brasiliensis		Labrisomidae	demersal	3.5	3.4
Starksia culebrae		Labrisomidae	demersal	3.3	3.4
Starksia elongata	Elongate blenny	Labrisomidae	reef-associated	2.8	3.2
Starksia fasciata	Blackbar blenny	Labrisomidae	reef-associated	3.3	3.3
Starksia guttata	Spotted blenny	Labrisomidae	reef-associated	5.6	3.6
Starksia hassi	Ringed blenny	Labrisomidae	reef-associated	4	3.4
Starksia lepicoelia	Blackcheek blenny	Labrisomidae	reef-associated	3.4	3.3
Starksia nanodes		Labrisomidae	reef-associated	2.6	3.2
Starksia occidentalis	Occidental blenny	Labrisomidae	reef-associated	3.3	3.4
Starksia ocellata	Checkered blenny	Labrisomidae	reef-associated	6	3.7
Starksia sluiteri	Chessboard blenny	Labrisomidae	reef-associated	3.4	3.3
Starksia starcki	Key blenny	Labrisomidae	reef-associated	4	3.4
Starksia variabilis		Labrisomidae	reef-associated	3.3	3.4
Starksia y-lineata	Forked bar blenny	Labrisomidae	reef-associated	2.3	3.1
Lampris guttatus	Opah	Lampridae	bathypelagic	200	4.2
Lampris immaculatus	Southern opah	Lampridae	pelagic-oceanic	110	4.4
Gazza minuta	Toothpony	Leiognathidae	demersal	23.3	4.2
Secutor insidiator	Pugnose ponyfish	Leiognathidae	demersal	13.8	2.8
Secutor ruconius	Deep pugnose ponyfish	Leiognathidae	demersal	8	3.4
Leptochilichthys agassizii	Agassiz' smooth-head	Leptochilichthyidae	bathypelagic	37.6	3.3
Leptochilichthys pinguis	Vaillant's smooth-head	Leptochilichthyidae	bathypelagic	29.6	3.3
Lethrinus atlanticus	Atlantic emperor	Lethrinidae	reef-associated	50	3.5
Lethrinus nebulosus	Spangled emperor	Lethrinidae	reef-associated	87	3.3
Haplophryne mollis	Soft leafvent angler	Linophrynidae	bathypelagic	19.4	4
Linophryne algibarbata		Linophrynidae	bathypelagic	23.1	4.1
Linophryne arborifera		Linophrynidae	bathypelagic	9.4	3.7
Linophryne arcturi		Linophrynidae	bathypelagic	11.7	3.8
Linophryne brevibarbata		Linophrynidae	bathypelagic	11.7	3.8
Linophryne coronata		Linophrynidae	bathypelagic	22.5	3.8
Linophryne lucifer		Linophrynidae	bathypelagic	33.5	4.1
Linophryne macrodon		Linophrynidae	bathypelagic	11.1	3.8
Linophryne maderensis		Linophrynidae	bathypelagic	11.7	3.8
Linophryne parini		Linophrynidae	bathypelagic	7.8	3.6
Linophryne pennibarbata		Linophrynidae	bathypelagic	11.7	3.8
Linophryne polypogon		Linophrynidae	bathypelagic	4.5	3.4
Linophryne racemifera		Linophrynidae	bathypelagic	11.7	3.8
Linophryne sexfilis		Linophrynidae	bathypelagic	11.7	3.8
Photocorynus spiniceps		Linophrynidae	bathypelagic	12	3.8
Careproctus acaecus	Appendageless snailfish	Liparidae	bathydemersal	6.7	3.1
Careproctus aciculipunctatus		Liparidae	bathydemersal	21	3.3
Careproctus acifer		Liparidae	bathydemersal	13.2	3.3
Careproctus aculeolatus	Small-spine snailfish	Liparidae	bathydemersal	11.4	3.2
Careproctus albescens		Liparidae	bathydemersal	23	3
Careproctus armatus		Liparidae	bathydemersal	21.6	3.3
Careproctus atrans	Black snailfish	Liparidae	bathydemersal	7.5	3.2
Careproctus aureomarginatus	Marginate snailfish	Liparidae	bathydemersal	7.3	3.1
Careproctus cactiformis		Liparidae	bathydemersal	21.6	3.3
Careproctus continentalis		Liparidae	bathydemersal	7.6	3.2
Careproctus credispinulosus		Liparidae	bathydemersal	21.6	3.3
Careproctus dubius		Liparidae	demersal	21.6	3.3
Careproctus falklandicus		Liparidae	demersal	21.6	3.3
Careproctus fedorovi		Liparidae	bathydemersal	21.6	3.3
Careproctus georgianus		Liparidae	demersal	21.6	3.2
Careproctus improvisus		Liparidae	bathydemersal	21.6	3.3
Careproctus lacmi		Liparidae	bathydemersal	21.6	3.3
Careproctus leptorhinus		Liparidae	bathydemersal	21.6	3.3
Careproctus longipectoralis		Liparidae	bathydemersal	20.5	3.3
Careproctus longipinnis	Longfin snailfish	Liparidae	bathydemersal	22.1	3.5
Careproctus macranchus		Liparidae	bathydemersal	21.6	3.3
Careproctus merretti	Merret's snailfish	Liparidae	bathydemersal	25	3.3
Careproctus micropus		Liparidae	bathydemersal	21.6	3.3
Careproctus minimus		Liparidae	demersal	21.6	3.3
Careproctus pallidus		Liparidae	demersal	21.6	3.3
Careproctus parviporatus		Liparidae	bathydemersal	21.6	3.3
Careproctus polarsterni		Liparidae	bathydemersal	21.6	3.3
Careproctus ranula	Scotian snailfish	Liparidae	demersal	9.9	3.2
Careproctus reinhardti	Sea tadpole	Liparidae	bathydemersal	30	3.8
Careproctus rimiventris		Liparidae	bathydemersal	21.6	3.3
Careproctus sandwichensis		Liparidae	bathydemersal	21.6	3.3
Careproctus scaphopterus		Liparidae	bathydemersal	21.6	3.3
Careproctus steini		Liparidae	bathydemersal	21.6	3.3
Careproctus tricapitidens		Liparidae	bathydemersal	21.6	3.3
Careproctus vladibeckeri		Liparidae	bathydemersal	21.6	3.3
Careproctus zispi		Liparidae	bathydemersal	21.6	3.3
Edentoliparis terraenovae		Liparidae	bathypelagic	8.7	3.3
Genioliparis lindbergi		Liparidae	bathydemersal	31	3.5
Liparis antarcticus		Liparidae	demersal	20	3.4
Liparis atlanticus	Atlantic seasnail	Liparidae	demersal	13	3.3
Liparis coheni	Gulf snailfish	Liparidae	demersal	11.8	3.3
Liparis fabricii	Gelatinous snailfish	Liparidae	bathydemersal	20	3.3
Liparis gibbus	Variegated snailfish	Liparidae	demersal	52	3.3
Liparis inquilinus	Inquiline snailfish	Liparidae	demersal	7.1	3.3
Liparis liparis barbatus	Sea-snail	Liparidae	demersal	20	3.4
Liparis liparis liparis	Striped seasnail	Liparidae	demersal	15	3.6
Liparis montagui	Montagus seasnail	Liparidae	demersal	12	3.5
Liparis tunicatus	Kelp snailfish	Liparidae	demersal	16	3.5
Notoliparis kurchatovi	Kurchatov's notoliparis	Liparidae	bathydemersal	13.2	3.3
Paraliparis abyssorum		Liparidae	bathydemersal	13.8	3.5
Paraliparis acutidens		Liparidae	demersal	13.2	3.4
Paraliparis antarcticus		Liparidae	bathydemersal	19.9	3.5
Paraliparis aspersus		Liparidae	bathydemersal	18.1	3.5
Paraliparis australis		Liparidae	bathydemersal	5	3.2
Paraliparis bathybius	Black seasnail	Liparidae	bathydemersal	30.9	3.3
Paraliparis bipolaris		Liparidae	bathydemersal	11.2	3.4
Paraliparis calidus	Lowfin snailfish	Liparidae	bathydemersal	17.3	4
Paraliparis cerasinus		Liparidae	bathydemersal	18.1	3.5
Paraliparis challengeri		Liparidae	bathydemersal	18.1	3.5
Paraliparis copei copei	Blacksnout seasnail	Liparidae	bathydemersal	17	4
Paraliparis copei gibbericeps		Liparidae	bathydemersal	16	3.5
Paraliparis copei wilsoni		Liparidae	bathydemersal	31.7	3.6
Paraliparis diploprora		Liparidae	bathydemersal	18.1	3.5
Paraliparis edwardsi		Liparidae	bathydemersal	10	3.4
Paraliparis garmani	Pouty seasnail	Liparidae	bathydemersal	18.1	3.5
Paraliparis gracilis		Liparidae	bathydemersal	12.5	3.4
Paraliparis hubbsi		Liparidae	bathydemersal	18.1	3.5
Paraliparis hystrix		Liparidae	bathydemersal	18.1	3.5
Paraliparis kocki		Liparidae	demersal	33.8	3.7
Paraliparis kreffti		Liparidae	bathydemersal	18.1	3.5
Paraliparis leucogaster		Liparidae	bathydemersal	11.6	3.4
Paraliparis leucoglossus		Liparidae	bathydemersal	12.1	3.4
Paraliparis mawsoni		Liparidae	bathydemersal	19.4	3.5
Paraliparis meganchus	Slit branchial paraliparis	Liparidae	bathydemersal	26.5	3.3
Paraliparis membranaceus		Liparidae	bathydemersal	7.3	3.3
Paraliparis monoporus		Liparidae	bathydemersal	28.8	3.6
Paraliparis porcus		Liparidae	demersal	10.4	3.4
Paraliparis somovi		Liparidae	bathydemersal	25.3	3.6
Paraliparis stehmanni		Liparidae	bathydemersal	23.8	3.6
Paraliparis tetrapteryx		Liparidae	bathydemersal	17.3	3.5
Paraliparis thalassobathyalis		Liparidae	bathydemersal	16.5	3.5
Paraliparis trilobodon		Liparidae	bathydemersal	12.7	3.4
Paraliparis trunovi		Liparidae	bathydemersal	18.1	3.5
Paraliparis valentinae		Liparidae	bathydemersal	29.3	3.6
Praematoliparis anarthractae		Liparidae	demersal	18.7	3.4
Psednos christinae	European dwarf snailfish	Liparidae	bathydemersal	6.5	3.2
Psednos micrurus	Barnard's dwarf snailfish	Liparidae	bathydemersal	5.5	3.2
Rhodichthys regina	Threadfin seasnail	Liparidae	bathydemersal	37.8	3.5
Volodichthys herwigi		Liparidae	bathydemersal	33.3	3.3
Volodichthys parini		Liparidae	bathydemersal	24.8	3.3
Volodichthys smirnovi		Liparidae	bathydemersal	33.3	3.3
Lobotes surinamensis	Tripletail	Lobotidae	benthopelagic	110	4
Lophiodes beroe		Lophiidae	bathydemersal	48.8	4.5
Lophiodes kempi	Longspine African angler	Lophiidae	demersal	40	4.5
Lophiodes monodi		Lophiidae	bathydemersal	39.7	4.4
Lophiodes reticulatus	Reticulated goosefish	Lophiidae	bathydemersal	25	4.2
Lophiomus setigerus	Blackmouth angler	Lophiidae	demersal	40	4
Lophius americanus	American angler	Lophiidae	demersal	120	4.5
Lophius budegassa	Blackbellied angler	Lophiidae	bathydemersal	122	4.5
Lophius gastrophysus	Blackfin goosefish	Lophiidae	bathydemersal	60	4.5
Lophius piscatorius	Angler	Lophiidae	bathydemersal	244	4.4
Lophius vaillanti	Shortspine African angler	Lophiidae	bathydemersal	50	4.5
Lophius vomerinus	Devil anglerfish	Lophiidae	bathydemersal	100	4.5
Eumecichthys fiski	Unicorn crestfish	Lophotidae	bathypelagic	150	4.2
Lophotus capellei	Unicornfish	Lophotidae	bathypelagic	244	4.3
Lophotus lacepede	Crested oarfish	Lophotidae	bathypelagic	200	4.5
Brosme brosme	Tusk	Lotidae	demersal	120	4
Ciliata mustela	Fivebeard rockling	Lotidae	demersal	25	3.5
Ciliata septentrionalis	Northern rockling	Lotidae	demersal	20	3.5
Enchelyopus cimbrius	Fourbeard rockling	Lotidae	demersal	41	3.5
Gaidropsarus argentatus	Arctic rockling	Lotidae	bathydemersal	42.7	3.4
Gaidropsarus biscayensis	Mediterranean bigeye rockling	Lotidae	benthopelagic	40	3.6
Gaidropsarus capensis	Cape rockling	Lotidae	benthopelagic	20	3.4
Gaidropsarus ensis	Threadfin rockling	Lotidae	benthopelagic	40	3.4
Gaidropsarus granti	Azores rockling	Lotidae	demersal	43.9	3.6
Gaidropsarus guttatus		Lotidae	demersal	31.7	2.8
Gaidropsarus insularum	Comb rockling	Lotidae	demersal	34	3.5
Gaidropsarus macrophthalmus	Bigeye rockling	Lotidae	demersal	25	3.5
Gaidropsarus mediterraneus	Shore rockling	Lotidae	demersal	50	3.4
Gaidropsarus parini	Parin rockling	Lotidae	demersal	37.7	3.5
Gaidropsarus vulgaris	Three-bearded rockling	Lotidae	demersal	60	3.3
Lota lota	Burbot	Lotidae	demersal	152	4
Molva dypterygia	Blue ling	Lotidae	demersal	155	4.5
Molva macrophthalma	Spanish ling	Lotidae	demersal	108	4.5
Molva molva	Ling	Lotidae	demersal	200	4.3
Aphareus rutilans	Rusty jobfish	Lutjanidae	reef-associated	110	4.1
Aprion virescens	Green jobfish	Lutjanidae	reef-associated	112	4
Apsilus dentatus	Black snapper	Lutjanidae	reef-associated	65	4.1
Apsilus fuscus	African forktail snapper	Lutjanidae	demersal	75	4
Etelis oculatus	Queen snapper	Lutjanidae	bathydemersal	100	4.2
Lutjanus agennes	African red snapper	Lutjanidae	reef-associated	139	4
Lutjanus ambiguus	Ambiguous snapper	Lutjanidae	reef-associated	40	3.9
Lutjanus analis	Mutton snapper	Lutjanidae	reef-associated	94	3.9
Lutjanus apodus	Schoolmaster snapper	Lutjanidae	reef-associated	67.2	4.2
Lutjanus argentimaculatus	Mangrove red snapper	Lutjanidae	reef-associated	150	3.6
Lutjanus buccanella	Blackfin snapper	Lutjanidae	reef-associated	75	3.9
Lutjanus campechanus	Northern red snapper	Lutjanidae	reef-associated	100	4
Lutjanus cyanopterus	Cubera snapper	Lutjanidae	reef-associated	160	4.2
Lutjanus dentatus	African brown snapper	Lutjanidae	reef-associated	150	4
Lutjanus endecacanthus	Guinea snapper	Lutjanidae	reef-associated	85	4.1
Lutjanus fulgens	Golden African snapper	Lutjanidae	demersal	60	4
Lutjanus fulvus	Blacktail snapper	Lutjanidae	reef-associated	40	4.1
Lutjanus goreensis	Gorean snapper	Lutjanidae	reef-associated	80	4
Lutjanus griseus	Grey snapper	Lutjanidae	reef-associated	89	4.3
Lutjanus jocu	Dog snapper	Lutjanidae	reef-associated	128	4.3
Lutjanus kasmira	Common bluestripe snapper	Lutjanidae	reef-associated	40	3.6
Lutjanus mahogoni	Mahogany snapper	Lutjanidae	reef-associated	48	4.4
Lutjanus purpureus	Southern red snapper	Lutjanidae	demersal	100	3.6
Lutjanus synagris	Lane snapper	Lutjanidae	reef-associated	60	3.8
Lutjanus vivanus	Silk snapper	Lutjanidae	reef-associated	83	3.1
Ocyurus chrysurus	Yellowtail snapper	Lutjanidae	reef-associated	86.3	4
Pristipomoides aquilonaris	Wenchman	Lutjanidae	demersal	56	3.9
Pristipomoides filamentosus	Crimson jobfish	Lutjanidae	benthopelagic	100	3.6
Pristipomoides freemani	Slender wenchman	Lutjanidae	demersal	23.3	3.6
Pristipomoides macrophthalmus	Cardinal snapper	Lutjanidae	benthopelagic	50	3.9
Pristipomoides sieboldii	Lavender jobfish	Lutjanidae	benthopelagic	79	3.9
Rhomboplites aurorubens	Vermilion snapper	Lutjanidae	demersal	60	4.3
Luvarus imperialis	Luvar	Luvaridae	pelagic-oceanic	200	3.8
Asthenomacrurus victoris	Victory whiptail	Macrouridae	bathydemersal	24.9	3.5
Bathygadus cottoides	Codheaded rattail	Macrouridae	bathydemersal	24	3.2
Bathygadus favosus		Macrouridae	bathydemersal	46.5	3.2
Bathygadus macrops	Bullseye grenadier	Macrouridae	bathypelagic	50	3.2
Bathygadus melanobranchus	Vaillant's grenadier	Macrouridae	bathydemersal	50	3.3
Cetonurus globiceps	Globehead grenadier	Macrouridae	bathypelagic	50	3.8
Coelorinchus acanthiger	Surgeon grenadier	Macrouridae	bathydemersal	50	3.6
Coelorinchus aconcagua	Aconcagua grenadier	Macrouridae	benthopelagic	39	3.4
Coelorinchus braueri	Shovelnose grenadier	Macrouridae	bathydemersal	40	3.6
Coelorinchus caelorhincus	Hollowsnout grenadier	Macrouridae	benthopelagic	48	3.6
Coelorinchus caribbaeus	Blackfin grenadier	Macrouridae	bathydemersal	45	3.6
Coelorinchus caudani		Macrouridae	bathydemersal	36	3.5
Coelorinchus fasciatus	Banded whiptail	Macrouridae	bathydemersal	50	3.7
Coelorinchus geronimo		Macrouridae	benthopelagic	26.5	3.5
Coelorinchus kaiyomaru	Campbell whiptail	Macrouridae	bathydemersal	43	3.3
Coelorinchus karrerae	Karrer's whiptail	Macrouridae	bathydemersal	35	3.5
Coelorinchus labiatus	Spearsnouted grenadier	Macrouridae	bathydemersal	50	4
Coelorinchus marinii	Marini's grenadier	Macrouridae	benthopelagic	38	4.2
Coelorinchus matamua	Mahia whiptail	Macrouridae	bathydemersal	65	3.5
Coelorinchus occa	Swordsnout grenadier	Macrouridae	bathydemersal	50	3.6
Coelorinchus polli		Macrouridae	benthopelagic	30	3.5
Coelorinchus simorhynchus		Macrouridae	bathydemersal	40.5	3.3
Coelorinchus ventrilux	Firebelly grenadier	Macrouridae	bathydemersal	30	3.5
Coryphaenoides armatus	Abyssal grenadier	Macrouridae	bathypelagic	102	3.6
Coryphaenoides brevibarbis		Macrouridae	bathypelagic	35	3.5
Coryphaenoides carapinus	Carapine grenadier	Macrouridae	bathydemersal	45	3.5
Coryphaenoides ferrieri		Macrouridae	benthopelagic	60	3.6
Coryphaenoides filicauda	Grenadier	Macrouridae	bathypelagic	40	3.5
Coryphaenoides grahami	Graham's whiptail	Macrouridae	bathypelagic	40	3.5
Coryphaenoides guentheri	Günther's grenadier	Macrouridae	bathydemersal	50	3.3
Coryphaenoides lecointei		Macrouridae	bathydemersal	60	3.6
Coryphaenoides leptolepis	Ghostly grenadier	Macrouridae	bathydemersal	62	3.7
Coryphaenoides marshalli		Macrouridae	bathydemersal	50	3.6
Coryphaenoides mcmillani	McMillan's whiptail	Macrouridae	bathypelagic	34	3.5
Coryphaenoides mediterraneus	Mediterranean grenadier	Macrouridae	bathypelagic	73	3.4
Coryphaenoides mexicanus	Mexican grenadier	Macrouridae	bathydemersal	40	3.5
Coryphaenoides profundicolus	Deepwater grenadier	Macrouridae	benthopelagic	52.5	3.6
Coryphaenoides rudis	Rudis rattail	Macrouridae	bathypelagic	111	4.5
Coryphaenoides rupestris	Roundnose grenadier	Macrouridae	bathypelagic	110	3.5
Coryphaenoides striaturus	Striate whiptail	Macrouridae	bathypelagic	54	3.6
Coryphaenoides subserrulatus	Longrayed whiptail	Macrouridae	bathydemersal	37	3.5
Coryphaenoides thelestomus	Roughlip grenadier	Macrouridae	benthopelagic	65	3.6
Coryphaenoides zaniophorus	Thickbeard grenadier	Macrouridae	bathydemersal	40	3.2
Cynomacrurus piriei	Dogtooth grenadier	Macrouridae	bathypelagic	50	3.4
Echinomacrurus mollis		Macrouridae	bathypelagic	46.5	3.2
Gadomus arcuatus	Doublethread grenadier	Macrouridae	bathypelagic	58	3.1
Gadomus capensis		Macrouridae	bathypelagic	46	3.1
Gadomus dispar		Macrouridae	bathydemersal	39.2	3
Gadomus longifilis	Treadfin grenadier	Macrouridae	bathypelagic	30	3.2
Haplomacrourus nudirostris	Naked snout rattail	Macrouridae	bathypelagic	57.5	3.6
Hymenocephalus aterrimus	Blackest whiptail	Macrouridae	bathypelagic	20	3.3
Hymenocephalus billsam		Macrouridae	bathydemersal	15	3.3
Hymenocephalus gracilis	Graceful grenadier	Macrouridae	bathypelagic	13	3.1
Hymenocephalus italicus	Glasshead grenadier	Macrouridae	benthopelagic	25	3.4
Kumba calvifrons		Macrouridae	bathypelagic	37	3.5
Kumba dentoni		Macrouridae	bathydemersal	22	3.5
Kumba maculisquama		Macrouridae	bathypelagic	26.7	3.5
Kuronezumia bubonis	Bulbous rattail	Macrouridae	benthopelagic	60	3.6
Kuronezumia leonis	Snubnose whiptail	Macrouridae	benthopelagic	50	3.6
Lucigadus ori	Bronze whiptail	Macrouridae	bathydemersal	22	3.5
Macrouroides inflaticeps	Inflated whiptail	Macrouridae	bathypelagic	48	3.6
Macrourus berglax	Roughhead grenadier	Macrouridae	benthopelagic	110	4.5
Macrourus carinatus	Ridge scaled rattail	Macrouridae	bathydemersal	100	3.8
Macrourus holotrachys	Bigeye grenadier	Macrouridae	bathydemersal	80	3.7
Macrourus whitsoni	Whitson's grenadier	Macrouridae	bathypelagic	75	3.5
Malacocephalus laevis	Softhead grenadier	Macrouridae	bathydemersal	60	4.2
Malacocephalus occidentalis	Western softhead grenadier	Macrouridae	bathydemersal	45	3.7
Malacocephalus okamurai		Macrouridae	bathydemersal	28	3.8
Mesobius antipodum	Bathypelagic rattail	Macrouridae	bathypelagic	66	3.7
Nezumia aequalis	Common Atlantic grenadier	Macrouridae	benthopelagic	36	3.3
Nezumia africana		Macrouridae	benthopelagic	29.5	3.3
Nezumia atlantica	Western Atlantic grenadier	Macrouridae	bathydemersal	45	3.4
Nezumia bairdii	Marlin-spike grenadier	Macrouridae	benthopelagic	40	3.6
Nezumia brevibarbata	Shortbeard grenadier	Macrouridae	bathydemersal	26	3.3
Nezumia cyrano		Macrouridae	bathypelagic	33	3.3
Nezumia duodecim	Twelve-rayed grenadier	Macrouridae	bathydemersal	25	3.5
Nezumia longebarbata	Bluntnose grenadier	Macrouridae	bathypelagic	40.5	3.4
Nezumia micronychodon	Smalltooth grenadier	Macrouridae	bathydemersal	34	3.2
Nezumia milleri	Miller's grenadier	Macrouridae	bathydemersal	38	3.3
Nezumia sclerorhynchus	Roughtip grenadier	Macrouridae	bathypelagic	36	3.2
Nezumia suilla		Macrouridae	bathydemersal	25.2	3.3
Nezumia umbracincta		Macrouridae	bathydemersal	38.5	3.3
Odontomacrurus murrayi	Roundhead grenadier	Macrouridae	bathypelagic	64	4.5
Paracetonurus flagellicauda		Macrouridae	bathydemersal	39.3	3.6
Sphagemacrurus grenadae	Pugnose grenadier	Macrouridae	bathypelagic	25	3.5
Sphagemacrurus hirundo	Swallow grenadier	Macrouridae	bathydemersal	21	3.4
Squalogadus modificatus	Tadpole whiptail	Macrouridae	bathypelagic	35	3.5
Trachonurus sulcatus	Bristly grenadier	Macrouridae	bathypelagic	50	3.6
Trachonurus villosus	Furry whiptail	Macrouridae	bathypelagic	60	3.6
Trachyrincus murrayi	Roughnose grenadier	Macrouridae	benthopelagic	37	3.5
Trachyrincus scabrus	Roughsnout grenadier	Macrouridae	bathydemersal	60	3.5
Ventrifossa divergens	Plainfin grenadier	Macrouridae	bathydemersal	30	3.7
Ventrifossa macropogon	Longbeard grenadier	Macrouridae	bathydemersal	45	3.8
Ventrifossa mucocephalus	Slimehead grenadier	Macrouridae	bathydemersal	40	3.8
Ventrifossa mystax		Macrouridae	bathydemersal	30	3.7
Branchiostegus semifasciatus	Zebra tilefish	Malacanthidae	demersal	60	3.6
Caulolatilus bermudensis	Bermuda tilefish	Malacanthidae	bathydemersal	40.7	3.7
Caulolatilus chrysops	Atlantic goldeneye tilefish	Malacanthidae	demersal	60	3.6
Caulolatilus cyanops	Blackline tilefish	Malacanthidae	demersal	60	4
Caulolatilus dooleyi	Bankslope tilefish	Malacanthidae	bathydemersal	35	3.7
Caulolatilus guppyi	Reticulated tilefish	Malacanthidae	demersal	35	3.7
Caulolatilus intermedius	Gulf bareye tilefish	Malacanthidae	demersal	60	3.8
Caulolatilus microps	Grey tilefish	Malacanthidae	demersal	90	3.8
Caulolatilus williamsi	Yellowbar tilefish	Malacanthidae	demersal	46.9	3.7
Lopholatilus chamaeleonticeps	Great northern tilefish	Malacanthidae	demersal	125	3.5
Lopholatilus villarii	Tile fish	Malacanthidae	demersal	107	3.7
Malacanthus plumieri	Sand tilefish	Malacanthidae	reef-associated	85.4	3.6
Megalops atlanticus	Tarpon	Megalopidae	reef-associated	250	4.5
Megalops cyprinoides	Indo-Pacific tarpon	Megalopidae	benthopelagic	150	3.3
Melamphaes eulepis		Melamphaidae	bathypelagic	5.6	3.5
Melamphaes hubbsi		Melamphaidae	bathypelagic	3	3.2
Melamphaes leprus		Melamphaidae	bathypelagic	13.7	3.7
Melamphaes longivelis	Eyebrow bigscale	Melamphaidae	bathypelagic	12.9	3.9
Melamphaes microps		Melamphaidae	bathypelagic	11.7	3.8
Melamphaes polylepis		Melamphaidae	bathypelagic	8.3	3.6
Melamphaes pumilus		Melamphaidae	bathypelagic	2.8	3.2
Melamphaes simus	Ridgehead	Melamphaidae	bathypelagic	3.5	3
Melamphaes suborbitalis	Shoulderspine bigscale	Melamphaidae	bathypelagic	12.2	3.8
Melamphaes typhlops		Melamphaidae	bathypelagic	9.5	3.7
Poromitra capito		Melamphaidae	bathypelagic	12.2	3.4
Poromitra crassiceps	Crested bigscale	Melamphaidae	bathypelagic	18.1	3.1
[truncated: 2,007 more rows]

## Sheet: Table 7
Data from FishBase (version (06/2014). www.fishbase.org
Mediterranee
Species	Name	Family	Habitat	Length (cm)	Trophic Level
Acanthurus monroviae	Monrovia doctorfish	Acanthuridae	demersal	54.9	2.5
Acipenser naccarii	Adriatic sturgeon	Acipenseridae	demersal	200	3.3
Acipenser stellatus	Starry sturgeon	Acipenseridae	demersal	220	3.1
Acipenser sturio	Sturgeon	Acipenseridae	demersal	600	3.5
Huso huso	Beluga	Acipenseridae	demersal	800	4.1
Synagrops japonicus	Blackmouth splitfin	Acropomatidae	benthopelagic	42.7	4.3
Alepisaurus ferox	Long snouted lancetfish	Alepisauridae	bathypelagic	215	4.1
Alepocephalus rostratus	Risso's smooth-head	Alepocephalidae	bathydemersal	61	3.5
Alopias superciliosus	Bigeye thresher	Alopiidae	pelagic-oceanic	488	4.5
Alopias vulpinus	Thresher	Alopiidae	pelagic-oceanic	760	4.5
Ammodytes tobianus	Small sandeel	Ammodytidae	demersal	24.4	3.1
Gymnammodytes cicerelus	Mediterranean sand eel	Ammodytidae	demersal	17	3.4
Gymnammodytes semisquamatus	Smooth sandeel	Ammodytidae	demersal	36.6	2.7
Anguilla anguilla	European eel	Anguillidae	demersal	133	3.5
Anguilla japonica	Japanese eel	Anguillidae	demersal	150	3.5
Apogon imberbis	Cardinal fish	Apogonidae	reef-associated	18.3	3.9
Apogon queketti	Spotfin cardinal	Apogonidae	benthopelagic	8	3.4
Apogon smithi	Smith's cardinalfish	Apogonidae	demersal	12.2	3.6
Apogonichthyoides nigripinnis	Bullseye	Apogonidae	reef-associated	10	3.4
Apogonichthyoides pharaonis		Apogonidae	demersal	9.1	3.5
Apogonichthyoides taeniatus	Twobelt cardinal	Apogonidae	reef-associated	17	3.5
Ostorhinchus fasciatus	Broadbanded cardinalfish	Apogonidae	reef-associated	10.3	3.6
Argentina sphyraena	Argentine	Argentinidae	bathydemersal	42.7	3.6
Glossanodon leioglossus	Smalltoothed argentine	Argentinidae	bathydemersal	20	3.5
Arius parkii	Guinean sea catfish	Ariidae	demersal	75	4.1
Netuma thalassina	Giant catfish	Ariidae	demersal	185	3.1
Atherina boyeri	Big-scale sand smelt	Atherinidae	demersal	20	2.3
Atherina hepsetus	Mediterranean sand smelt	Atherinidae	pelagic-neritic	20	3.2
Atherina presbyter	Sand smelt	Atherinidae	pelagic-neritic	20	3.7
Atherinomorus forskalii	Red Sea hardyhead silverside	Atherinidae	reef-associated	16.2
Aulopus filamentosus	Royal flagfin	Aulopidae	demersal	53.7	4.2
Balistes capriscus	Grey triggerfish	Balistidae	reef-associated	60	3.5
Bathysaurus mollis	Highfin lizardfish	Bathysauridae	bathydemersal	95.2	4.5
Halobatrachus didactylus	Lusitanian toadfish	Batrachoididae	demersal	50	4
Belone belone	Garfish	Belonidae	pelagic-oceanic	93	4.2
Belone svetovidovi		Belonidae	pelagic-oceanic	93	4.3
Tylosurus acus acus	Agujon needlefish	Belonidae	reef-associated	153	4.5
Tylosurus acus imperialis		Belonidae	pelagic-oceanic	170.8	4.5
Tylosurus choram	Red Sea houndfish	Belonidae	pelagic-oceanic	120	4.4
Beryx decadactylus	Alfonsino	Berycidae	bathydemersal	100	4.1
Beryx splendens	Splendid alfonsino	Berycidae	benthopelagic	70	4.4
Aidablennius sphynx		Blenniidae	demersal	8	2.5
Blennius ocellaris	Butterfly blenny	Blenniidae	demersal	20	3.5
Coryphoblennius galerita	Montagu's blenny	Blenniidae	demersal	9.3	2.2
Hypleurochilus bananensis		Blenniidae	demersal	12.8	3.2
Lipophrys pholis	Shanny	Blenniidae	demersal	30	3.1
Lipophrys trigloides		Blenniidae	demersal	13	3.5
Microlipophrys adriaticus		Blenniidae	demersal	4	2.9
Microlipophrys canevae		Blenniidae	demersal	7.5	2.1
Microlipophrys dalmatinus		Blenniidae	demersal	4.1	3.2
Microlipophrys nigriceps	Black-headed blenny	Blenniidae	demersal	4.3	2.7
Parablennius gattorugine	Tompot blenny	Blenniidae	demersal	30	2.9
Parablennius incognitus		Blenniidae	demersal	7.1	2.4
Parablennius pilicornis	Ringneck blenny	Blenniidae	demersal	15.5	3.2
Parablennius rouxi		Blenniidae	demersal	8	2.6
Parablennius sanguinolentus	Rusty blenny	Blenniidae	demersal	20	2.1
Parablennius tentacularis	Tentacled blenny	Blenniidae	demersal	15	3.1
Parablennius zvonimiri		Blenniidae	demersal	7	2.4
Petroscirtes ancylodon	Arabian fangblenny	Blenniidae	demersal	11.5	2.1
Salaria basilisca		Blenniidae	demersal	18	3.2
Salaria pavo	Peacock blenny	Blenniidae	demersal	13	2.9
Scartella cristata	Molly miller	Blenniidae	reef-associated	12	2
Arnoglossus grohmanni		Bothidae	demersal	18.9	3.6
Arnoglossus imperialis	Imperial scaldfish	Bothidae	demersal	25	3.8
Arnoglossus kessleri	Scaldback	Bothidae	demersal	10	4.1
Arnoglossus laterna	Mediterranean scaldfish	Bothidae	demersal	30.5	3.6
Arnoglossus rueppelii	Rüppell's scaldback	Bothidae	demersal	18.3	4
Arnoglossus thori	Thor's scaldfish	Bothidae	demersal	22	3.3
Bothus podas	Wide-eyed flounder	Bothidae	demersal	45	3.4
Brama brama	Atlantic pomfret	Bramidae	bathypelagic	100	4.1
Bregmaceros atlanticus	Antenna codlet	Bregmacerotidae	pelagic-oceanic	6.7	2.8
Bellottia apoda		Bythitidae	bathydemersal	7.9	3.4
Cataetyx alleni		Bythitidae	bathydemersal	12	3.4
Cataetyx laticeps		Bythitidae	bathydemersal	65	3.8
Grammonus ater		Bythitidae	reef-associated	14.6	3.5
Callanthias ruber	Parrot seaperch	Callanthiidae	demersal	60	3.8
Callionymus fasciatus		Callionymidae	demersal	12	3.3
Callionymus filamentosus	Blotchfin dragonet	Callionymidae	demersal	20	3.3
Callionymus lyra	Dragonet	Callionymidae	demersal	30	3.3
Callionymus maculatus		Callionymidae	demersal	16	3.3
Callionymus pusillus		Callionymidae	demersal	14	3.3
Callionymus reticulatus	Reticulated dragonet	Callionymidae	demersal	11	3.3
Callionymus risso		Callionymidae	demersal	11	3
Synchiropus phaeton	Phaeton dragonet	Callionymidae	demersal	18	3.4
Capros aper	Boarfish	Caproidae	demersal	30	3.1
Alectis alexandrina	Alexandria pompano	Carangidae	pelagic-neritic	100	3.6
Alepes djedaba	Shrimp scad	Carangidae	reef-associated	40	3.3
Campogramma glaycos	Vadigo	Carangidae	benthopelagic	66.6	4.5
Caranx crysos	Blue runner	Carangidae	reef-associated	70	4.4
Caranx hippos	Crevalle jack	Carangidae	reef-associated	124	3.5
Caranx rhonchus	False scad	Carangidae	benthopelagic	60	3.6
Decapterus macarellus	Mackerel scad	Carangidae	pelagic-oceanic	46	3.4
Decapterus punctatus	Round scad	Carangidae	reef-associated	36.6	4.3
Decapterus russelli	Indian scad	Carangidae	benthopelagic	45	3.7
Elagatis bipinnulata	Rainbow runner	Carangidae	reef-associated	180	3.6
Lichia amia	Leerfish	Carangidae	pelagic-neritic	200	4.5
Naucrates ductor	Pilotfish	Carangidae	reef-associated	70	4
Pseudocaranx dentex	White trevally	Carangidae	reef-associated	122	3.9
Seriola carpenteri	Guinean amberjack	Carangidae	benthopelagic	72.5	4.5
Seriola dumerili	Greater amberjack	Carangidae	reef-associated	190	4.5
Seriola fasciata	Lesser amberjack	Carangidae	benthopelagic	74.9	4.5
Trachinotus ovatus	Pompano	Carangidae	pelagic-neritic	70	3.7
Trachurus mediterraneus	Mediterranean horse mackerel	Carangidae	pelagic-oceanic	66.6	3.6
Trachurus picturatus	Blue jack mackerel	Carangidae	benthopelagic	60	3.3
Trachurus trachurus	Atlantic horse mackerel	Carangidae	pelagic-neritic	70	3.6
Carapus acus	Pearl fish	Carapidae	demersal	20.8	4
Echiodon dentatus		Carapidae	demersal	17	3.7
Echiodon drummondii		Carapidae	bathydemersal	30	4
Centracanthus cirrus	Curled picarel	Centracanthidae	benthopelagic	34	3.3
Spicara maena	Blotched picarel	Centracanthidae	pelagic-neritic	30.5	4.2
Spicara smaris	Picarel	Centracanthidae	pelagic-oceanic	20	3
Macroramphosus scolopax	Longspine snipefish	Centriscidae	demersal	20	3.5
Centrolophus niger	Rudderfish	Centrolophidae	bathypelagic	183	3.9
Hyperoglyphe perciformis	Barrelfish	Centrolophidae	pelagic-oceanic	91	3.9
Schedophilus medusophagus	Cornish blackfish	Centrolophidae	pelagic-oceanic	51	4
Schedophilus ovalis	Imperial blackfish	Centrolophidae	benthopelagic	100	3.5
Cepola macrophthalma	Red bandfish	Cepolidae	demersal	80	3.1
Chaetodon hoefleri	Four-banded butterflyfish	Chaetodontidae	reef-associated	27	3.5
Chaetodon melannotus	Blackback butterflyfish	Chaetodontidae	reef-associated	18	3.3
Champsodon nudivittis		Champsodontidae	pelagic-oceanic	13.4	4.2
Champsodon vorax		Champsodontidae	demersal	10	4
Chaunax pictus	Pink frogmouth	Chaunacidae	bathydemersal	40	4.3
Chaunax suttkusi		Chaunacidae	bathydemersal	27.8	4.2
Chimaera monstrosa	Rabbit fish	Chimaeridae	bathydemersal	150	3.5
Chlopsis bicolor	Bicoloured false moray	Chlopsidae	demersal	42	3.7
Chlorophthalmus agassizi	Shortnose greeneye	Chlorophthalmidae	bathydemersal	40	3.7
Citharus linguatula	Spotted flounder	Citharidae	demersal	30	4
Clinitrachus argentatus	Cline	Clinidae	demersal	10	3.5
Alosa agone	Agone	Clupeidae	pelagic	39	3.6
Alosa algeriensis	North African shad	Clupeidae	pelagic-neritic	52.5
Alosa alosa	Allis shad	Clupeidae	pelagic-neritic	83	3.6
Alosa fallax	Twaite shad	Clupeidae	pelagic-neritic	73.2	3.6
Herklotsichthys punctatus	Spotback herring	Clupeidae	pelagic-neritic	10.4	3.2
Sardina pilchardus	European pilchard	Clupeidae	pelagic-neritic	33.5	3
Sardinella aurita	Round sardinella	Clupeidae	reef-associated	31	3.4
Sardinella maderensis	Madeiran sardinella	Clupeidae	pelagic-neritic	41.4	3.2
Spratelloides delicatulus	Delicate round herring	Clupeidae	reef-associated	8.5	3.1
Sprattus sprattus	European sprat	Clupeidae	pelagic-neritic	19.5	3
Ariosoma balearicum	Bandtooth conger	Congridae	reef-associated	35	3.9
Conger conger	European conger	Congridae	demersal	300	4.3
Gnathophis mystax	Thinlip conger	Congridae	demersal	60	3.6
Rhynchoconger trewavasae		Congridae	bathydemersal	57	3.9
Coryphaena equiselis	Pompano dolphinfish	Coryphaenidae	pelagic-oceanic	127	4.5
Coryphaena hippurus	Common dolphinfish	Coryphaenidae	pelagic-neritic	210	4.4
Taurulus bubalis	Longspined bullhead	Cottidae	demersal	25	3.6
Cynoglossus sinusarabici		Cynoglossidae	demersal	12.1	3.3
Symphurus ligulatus	Elongate tonguesole	Cynoglossidae	demersal	13.7	3.5
Symphurus nigrescens	Tonguesole	Cynoglossidae	demersal	14.6	3.3
Aphanius dispar dispar		Cyprinodontidae	demersal	7	2
Aphanius fasciatus		Cyprinodontidae	demersal	6	2.7
Aphanius iberus	Spanish toothcarp	Cyprinodontidae	benthopelagic	5.5	3.4
Dactylopterus volitans	Flying gurnard	Dactylopteridae	reef-associated	61	3.6
Cyclichthys spilostylus	Spotbase burrfish	Diodontidae	reef-associated	34	3.5
Diodon hystrix	Spot-fin porcupinefish	Diodontidae	reef-associated	91	3.4
Dussumieria acuta	Rainbow sardine	Dussumieriidae	pelagic-neritic	24.4	3.4
Dussumieria elopsoides	Slender rainbow sardine	Dussumieriidae	pelagic-neritic	24.4	3.4
Etrumeus golanii		Dussumieriidae	pelagic-neritic	25.4
Echeneis naucrates	Live sharksucker	Echeneidae	reef-associated	110	3.4
Remora australis	Whalesucker	Echeneidae	pelagic-oceanic	76	3.3
Remora brachyptera	Spearfish remora	Echeneidae	pelagic-oceanic	50	3.3
Remora osteochir	Marlin sucker	Echeneidae	pelagic-oceanic	48.8	3.5
Remora remora	Shark sucker	Echeneidae	reef-associated	86.4	3.1
Engraulis albidus		Engraulidae	pelagic-neritic	11.5	2.9
Engraulis encrasicolus	European anchovy	Engraulidae	pelagic-neritic	24.4	3.1
Epigonus constanciae		Epigonidae	bathydemersal	24	3.4
Epigonus denticulatus	Pencil cardinal	Epigonidae	bathydemersal	20	3.3
Epigonus telescopus	Black cardinal fish	Epigonidae	bathydemersal	75	3.3
Microichthys coccoi		Epigonidae	demersal	3	3.1
Microichthys sanzoi		Epigonidae	demersal	6	3.2
Etmopterus spinax	Velvet belly	Etmopteridae	bathydemersal	60	3.8
Evermannella balbo	Balbo sabretooth	Evermannellidae	bathypelagic	20.6	4.2
Cheilopogon exsiliens	Bandwing flyingfish	Exocoetidae	pelagic-oceanic	30	3
Cheilopogon heterurus	Mediterranean flyingfish	Exocoetidae	pelagic-neritic	40	3.4
Exocoetus obtusirostris	Oceanic two-wing flyingfish	Exocoetidae	pelagic-neritic	24	3
Exocoetus volitans	Tropical two-wing flyingfish	Exocoetidae	pelagic-neritic	30	3
Hirundichthys rondeletii	Black wing flyingfish	Exocoetidae	pelagic-oceanic	30	3
Hirundichthys speculiger	Mirrorwing flyingfish	Exocoetidae	pelagic-oceanic	30	3
Parexocoetus mento	African sailfin flyingfish	Exocoetidae	pelagic-neritic	13.4	3.3
Fistularia commersonii	Bluespotted cornetfish	Fistulariidae	reef-associated	160	4.3
Fistularia petimba	Red cornetfish	Fistulariidae	reef-associated	200	4.5
Gadiculus argenteus	Silvery pout	Gadidae	pelagic-oceanic	15	3.5
Merlangius merlangus	Whiting	Gadidae	benthopelagic	70	4.4
Micromesistius poutassou	Blue whiting	Gadidae	bathypelagic	50	4
Trisopterus capelanus		Gadidae	benthopelagic	40.3
Trisopterus luscus	Pouting	Gadidae	benthopelagic	46	3.7
Trisopterus minutus	Poor cod	Gadidae	benthopelagic	40	3.8
Gasterosteus aculeatus	Three-spined stickleback	Gasterosteidae	benthopelagic	11	3.5
Ruvettus pretiosus	Oilfish	Gempylidae	benthopelagic	300	4.2
Apletodon dentatus	Small-headed clingfish	Gobiesocidae	demersal	4.9	3.1
Apletodon incognitus		Gobiesocidae	demersal	3.3	3.2
Diplecogaster bimaculata bimaculata	Two-spotted clingfish	Gobiesocidae	demersal	7.3	3.3
Gouania willdenowi	Blunt-snouted clingfish	Gobiesocidae	demersal	5	3.2
Lepadogaster candolii	Connemarra clingfish	Gobiesocidae	demersal	9.1	2.8
Lepadogaster lepadogaster	Shore clingfish	Gobiesocidae	demersal	7.9	3.3
Lepadogaster purpurea	Cornish sucker	Gobiesocidae	demersal	9.1	3.3
Opeatogenys gracilis		Gobiesocidae	demersal	3	3.1
Aphia minuta	Transparent goby	Gobiidae	pelagic-neritic	7.9	3.1
Bathygobius soporator	Frillfin goby	Gobiidae	demersal	15	3.5
Benthophilus stellatus	Stellate tadpole-goby	Gobiidae	demersal	13.5	3.1
Buenia affinis	De Buen's goby	Gobiidae	demersal	4.1	3.1
Buenia jeffreysii	Jeffrey's goby	Gobiidae	demersal	6	3.6
Chromogobius quadrivittatus	Chestnut goby	Gobiidae	demersal	8	3.4
Chromogobius zebratus	Kolombatovic's goby	Gobiidae	demersal	6.5	3.2
Corcyrogobius liechtensteini	Liechtenstein's goby	Gobiidae	demersal	2.5	3
Coryogalops ocheticus		Gobiidae	demersal	6.2	3.2
Crystallogobius linearis	Crystal goby	Gobiidae	demersal	5.7	3.4
Deltentosteus collonianus	Toothed goby	Gobiidae	demersal	7	3.5
Deltentosteus quadrimaculatus	Four-spotted goby	Gobiidae	demersal	8	3.1
Didogobius bentuvii	Ben-Tuvia's goby	Gobiidae	demersal	4.5	3.2
Didogobius schlieweni		Gobiidae	demersal	4.5	3.2
Didogobius splechtnai		Gobiidae	demersal	3.4	3.1
Favonigobius melanobranchus	Blackthroat goby	Gobiidae	demersal	5.5	3.3
Gammogobius steinitzi	Steinitz's goby	Gobiidae	demersal	4.6	3.2
Gobius ater	Bellotti's goby	Gobiidae	demersal	8.7	3.1
Gobius auratus	Golden goby	Gobiidae	demersal	10	3
Gobius bucchichi	Bucchich's goby	Gobiidae	demersal	10	3.1
Gobius cobitis	Giant goby	Gobiidae	demersal	27	3
Gobius couchi	Couch's goby	Gobiidae	demersal	7.7	2.9
Gobius cruentatus	Red-mouthed goby	Gobiidae	demersal	18	3.1
Gobius fallax	Sarato's goby	Gobiidae	demersal	9	3.3
Gobius gasteveni	Steven's goby	Gobiidae	demersal	12	3.1
Gobius geniporus	Slender goby	Gobiidae	demersal	16	3.3
Gobius kolombatovici		Gobiidae	demersal	11.2	3.1
Gobius niger	Black goby	Gobiidae	demersal	18	3.2
Gobius paganellus	Rock goby	Gobiidae	demersal	12	3.3
Gobius roulei	Roule's goby	Gobiidae	bathydemersal	8	3.1
Gobius strictus	Schmidt's goby	Gobiidae	demersal	7.9	3.1
Gobius vittatus	Striped goby	Gobiidae	demersal	7.1	2.9
Gobius xanthocephalus		Gobiidae	demersal	10	3.1
Gobiusculus flavescens	Two-spotted goby	Gobiidae	demersal	6	3.2
Knipowitschia caucasica	Caucasian dwarf goby	Gobiidae	demersal	5	3.3
Knipowitschia panizzae	Adriatic dwarf goby	Gobiidae	demersal	5.5	3.5
Lebetus guilleti	Guillet's goby	Gobiidae	reef-associated	3	3.1
Lesueurigobius friesii	Fries's goby	Gobiidae	demersal	13	3.2
Lesueurigobius sanzi	Sanzo's goby	Gobiidae	demersal	11	3.6
Lesueurigobius suerii	Lesueur's goby	Gobiidae	demersal	5	3.5
Millerigobius macrocephalus		Gobiidae	demersal	5.3	3.2
Odondebuenia balearica	Coralline goby	Gobiidae	demersal	3.2	3.1
Oxyurichthys papuensis	Frogface goby	Gobiidae	reef-associated	24.4	3.5
Pomatoschistus bathi		Gobiidae	demersal	3	3.3
Pomatoschistus canestrinii	Canestrini's Goby	Gobiidae	demersal	5.5	3.2
Pomatoschistus knerii	Kner's goby	Gobiidae	demersal	7.2	3.3
Pomatoschistus marmoratus	Marbled goby	Gobiidae	demersal	8	3.3
Pomatoschistus microps	Common goby	Gobiidae	demersal	9	3.3
Pomatoschistus minutus	Sand goby	Gobiidae	demersal	11	3.2
Pomatoschistus norvegicus	Norway goby	Gobiidae	demersal	8	3.5
Pomatoschistus pictus	Painted goby	Gobiidae	demersal	6	3.1
Pomatoschistus quagga	Quagga goby	Gobiidae	demersal	6	3.3
Pomatoschistus tortonesei	Tortonese's goby	Gobiidae	demersal	7.2	3.4
Pseudaphya ferreri	Ferrer's goby	Gobiidae	benthopelagic	3.5	3.1
Silhouettea aegyptia	Red Sea goby	Gobiidae	demersal	5.3	3.3
Speleogobius trigloides	Grotto goby	Gobiidae	demersal	2.1	3
Thorogobius ephippiatus	Leopard-spotted goby	Gobiidae	demersal	13	3
Thorogobius macrolepis	Large-scaled goby	Gobiidae	demersal	6.5	3.2
Trypauchen vagina		Gobiidae	demersal	22	3.5
Vanneaugobius dollfusi		Gobiidae	demersal	4.1	3.1
Vanneaugobius pruvoti		Gobiidae	demersal	3.9	3.1
Zebrus zebrus		Gobiidae	demersal	5.5	3.2
Zosterisessor ophiocephalus	Grass goby	Gobiidae	demersal	25	3.1
Cyclothone braueri	Garrick	Gonostomatidae	bathypelagic	4.6	3.1
Cyclothone microdon	Veiled anglemouth	Gonostomatidae	bathypelagic	7.6	3
Cyclothone pygmaea		Gonostomatidae	bathypelagic	3.5	3.4
Gonostoma denudatum		Gonostomatidae	bathypelagic	17.1	3.3
Parapristipoma humile	Guinean grunt	Haemulidae	demersal	37	3.5
Parapristipoma octolineatum	African striped grunt	Haemulidae	demersal	61	3.5
Plectorhinchus mediterraneus	Rubberlip grunt	Haemulidae	demersal	97.6	3.5
Pomadasys incisus	Bastard grunt	Haemulidae	demersal	50	3.8
Pomadasys stridens	Striped piggy	Haemulidae	reef-associated	20	4
Halosaurus ovenii		Halosauridae	bathydemersal	60	3.5
Hemiramphus far	Black-barred halfbeak	Hemiramphidae	reef-associated	45	2.9
Hyporhamphus affinis	Tropical halfbeak	Hemiramphidae	reef-associated	46.4	3.5
Hyporhamphus picarti	African halfbeak	Hemiramphidae	benthopelagic	20	2
Panturichthys fowleri		Heterenchelyidae	demersal	88.5	3.9
Sargocentron praslin	Dark-striped squirrelfish	Holocentridae	reef-associated	32	3.6
Sargocentron rubrum	Redcoat	Holocentridae	reef-associated	32	3.5
Bathypterois dubius	Mediterranean spiderfish	Ipnopidae	bathydemersal	25	3.2
Bathypterois grallator	Tripodfish	Ipnopidae	bathydemersal	44.9	3.1
Istiompax indica	Black marlin	Istiophoridae	pelagic-oceanic	516.2	4.5
Istiophorus albicans	Atlantic sailfish	Istiophoridae	pelagic-oceanic	315	4.5
Istiophorus platypterus	Indo-Pacific sailfish	Istiophoridae	pelagic-oceanic	386.3	4.5
Kajikia albida	Atlantic white marlin	Istiophoridae	pelagic-oceanic	300	4.5
Makaira nigricans	Blue marlin	Istiophoridae	pelagic-oceanic	500	4.5
Tetrapturus belone	Mediterranean spearfish	Istiophoridae	pelagic-oceanic	240	4.5
Tetrapturus georgii	Roundscale spearfish	Istiophoridae	pelagic-oceanic	204.2	4.4
Kyphosus sectatrix	Bermuda sea chub	Kyphosidae	reef-associated	76	2
Acantholabrus palloni	Scale-rayed wrasse	Labridae	reef-associated	25	3.5
Centrolabrus exoletus	Rock cook	Labridae	reef-associated	18	3.5
Centrolabrus trutta	Emerald wrasse	Labridae	reef-associated	18	3.5
Coris julis	Mediterranean rainbow wrasse	Labridae	reef-associated	36.6	3.2
Ctenolabrus rupestris	Goldsinny-wrasse	Labridae	reef-associated	18	3.3
Iniistius pavo	Peacock wrasse	Labridae	reef-associated	41	3.5
Labrus bergylta	Ballan wrasse	Labridae	reef-associated	65.9	3.1
Labrus merula	Brown wrasse	Labridae	reef-associated	54.9	3.2
Labrus mixtus	Cuckoo wrasse	Labridae	reef-associated	48.8	3.9
Labrus viridis		Labridae	reef-associated	57.3	3.8
Lappanella fasciata		Labridae	reef-associated	18.3	3.3
Pteragogus pelycus	Sideburn wrasse	Labridae	demersal	15	3.5
Pteragogus trispilus		Labridae	reef-associated	9.6
Symphodus bailloni	Baillon's wrasse	Labridae	reef-associated	24.4	3.3
Symphodus cinereus	Grey wrasse	Labridae	demersal	16	3.3
Symphodus doderleini		Labridae	demersal	12.2	3.4
Symphodus mediterraneus	Axillary wrasse	Labridae	demersal	22	3.1
Symphodus melanocercus		Labridae	reef-associated	14	3
Symphodus melops	Corkwing wrasse	Labridae	reef-associated	34.2	3.2
Symphodus ocellatus		Labridae	reef-associated	14.6	3.3
Symphodus roissali	Five-spotted wrasse	Labridae	reef-associated	20.7	3.5
Symphodus rostratus		Labridae	reef-associated	15.9	3.5
Symphodus tinca	East Atlantic peacock wrasse	Labridae	reef-associated	53.7	3.1
Thalassoma pavo	Ornate wrasse	Labridae	reef-associated	30.5	3.5
Xyrichtys novacula	Pearly razorfish	Labridae	reef-associated	38	3.1
Lampris guttatus	Opah	Lampridae	bathypelagic	200	4.2
Equulites klunzingeri		Leiognathidae	demersal	13.4	3.5
Monotaxis grandoculis	Humpnose big-eye bream	Lethrinidae	reef-associated	60	3.2
Eutelichthys leptochirus		Liparidae	bathydemersal	6.2	3.2
Paraliparis murieli		Liparidae	bathydemersal	18.1	3.5
Lobotes surinamensis	Tripletail	Lobotidae	benthopelagic	110	4
Lophius budegassa	Blackbellied angler	Lophiidae	bathydemersal	122	4.5
Lophius piscatorius	Angler	Lophiidae	bathydemersal	244	4.4
Lophotus lacepede	Crested oarfish	Lophotidae	bathypelagic	200	4.5
Gaidropsarus biscayensis	Mediterranean bigeye rockling	Lotidae	benthopelagic	40	3.6
Gaidropsarus mediterraneus	Shore rockling	Lotidae	demersal	50	3.4
Gaidropsarus vulgaris	Three-bearded rockling	Lotidae	demersal	60	3.3
Molva dypterygia	Blue ling	Lotidae	demersal	155	4.5
Molva macrophthalma	Spanish ling	Lotidae	demersal	108	4.5
Molva molva	Ling	Lotidae	demersal	200	4.3
Lutjanus argentimaculatus	Mangrove red snapper	Lutjanidae	reef-associated	150	3.6
Lutjanus jocu	Dog snapper	Lutjanidae	reef-associated	128	4.3
Luvarus imperialis	Luvar	Luvaridae	pelagic-oceanic	200	3.8
Coelorinchus caelorhincus	Hollowsnout grenadier	Macrouridae	benthopelagic	48	3.6
Coelorinchus occa	Swordsnout grenadier	Macrouridae	bathydemersal	50	3.6
Coryphaenoides guentheri	Günther's grenadier	Macrouridae	bathydemersal	50	3.3
Coryphaenoides mediterraneus	Mediterranean grenadier	Macrouridae	bathypelagic	73	3.4
Hymenocephalus italicus	Glasshead grenadier	Macrouridae	benthopelagic	25	3.4
Nezumia aequalis	Common Atlantic grenadier	Macrouridae	benthopelagic	36	3.3
Nezumia sclerorhynchus	Roughtip grenadier	Macrouridae	bathypelagic	36	3.2
Trachyrincus scabrus	Roughsnout grenadier	Macrouridae	bathydemersal	60	3.5
Merluccius merluccius	European hake	Merlucciidae	demersal	140	4.4
Microstoma microstoma	Slender argentine	Microstomatidae	bathypelagic	21	3.4
Nansenia iberica		Microstomatidae	bathypelagic	30.5	3.3
Nansenia oblita		Microstomatidae	pelagic-oceanic	22	3.2
Mola mola	Ocean sunfish	Molidae	pelagic-oceanic	333	4
Ranzania laevis	Slender sunfish	Molidae	pelagic-oceanic	100	4
Aluterus monoceros	Unicorn leatherjacket filefish	Monacanthidae	reef-associated	76.2	3.5
Stephanolepis diaspros	Reticulated leatherjacket	Monacanthidae	demersal	25	2.8
Eretmophorus kleinenbergi		Moridae	benthopelagic	10.9	3.4
Gadella maraldi	Gadella	Moridae	benthopelagic	30	3.5
Guttigadus latifrons		Moridae	bathydemersal	22.2	3.4
Lepidion guentheri		Moridae	benthopelagic	98.8	3.6
Lepidion lepidion	Mediterranean codling	Moridae	bathypelagic	34	3.6
Mora moro	Common mora	Moridae	bathypelagic	80	3.8
Physiculus dalwigki	Black codling	Moridae	benthopelagic	30	3.4
Rhynchogadus hepaticus		Moridae	bathypelagic	12.2	3.3
Dicentrarchus labrax	European seabass	Moronidae	demersal	103	3.8
Dicentrarchus punctatus	Spotted seabass	Moronidae	pelagic-neritic	70	3.9
Chelon labrosus	Thicklip grey mullet	Mugilidae	demersal	91.5	2.6
Liza aurata	Golden grey mullet	Mugilidae	pelagic-neritic	59	2.5
Liza carinata	Keeled mullet	Mugilidae	pelagic-neritic	18	2.6
Liza haematocheila	So-iny mullet	Mugilidae	pelagic-neritic	80	2.5
Liza ramada	Thinlip grey mullet	Mugilidae	pelagic-neritic	70	2.2
Liza saliens	Leaping mullet	Mugilidae	demersal	48.8	3
Mugil cephalus	Flathead grey mullet	Mugilidae	benthopelagic	122	2.1
Oedalechilus labeo	Boxlip mullet	Mugilidae	demersal	25	2.5
Mullus barbatus barbatus	Red mullet	Mullidae	demersal	40.5	3.2
Mullus surmuletus	Surmullet	Mullidae	demersal	48.8	3.4
Parupeneus forsskali	Red Sea goatfish	Mullidae	reef-associated	28	3.3
Pseudupeneus prayensis	West African goatfish	Mullidae	demersal	67.1	3.2
Upeneus asymmetricus	Asymmetrical goatfish	Mullidae	demersal	30	3.5
Upeneus moluccensis	Goldband goatfish	Mullidae	reef-associated	22	3.6
Upeneus pori	Por's goatfish	Mullidae	demersal	19	3.3
Cynoponticus ferox	Guinean pike conger	Muraenesocidae	demersal	200	3.6
Muraenesox cinereus	Daggertooth pike conger	Muraenesocidae	demersal	220	4.1
Anarchias euryurus		Muraenidae	demersal	25	3.5
Enchelycore anatina	Fangtooth moray	Muraenidae	demersal	120	4
Gymnothorax reticularis		Muraenidae	demersal	60	4
Gymnothorax unicolor	Brown moray	Muraenidae	demersal	100	3.4
Muraena helena	Mediterranean moray	Muraenidae	reef-associated	150	4.2
Benthosema glaciale	Glacier lantern fish	Myctophidae	pelagic-oceanic	12.6	3
Ceratoscopelus maderensis	Madeira lantern fish	Myctophidae	bathypelagic	9.9	3
Diaphus holti	Small lantern fish	Myctophidae	bathypelagic	8.5	3.1
Diaphus metopoclampus	Spothead lantern fish	Myctophidae	bathypelagic	9.1	3.3
Diaphus rafinesquii	White-spotted lantern fish	Myctophidae	bathypelagic	11	3.4
Diogenichthys atlanticus	Longfin lanternfish	Myctophidae	bathypelagic	3.5	3.1
Electrona risso	Electric lantern fish	Myctophidae	bathypelagic	10	3.4
Gonichthys cocco	Cocco’s lanternfish	Myctophidae	bathypelagic	7.3	3.2
Hygophum benoiti	Benoit's lanternfish	Myctophidae	bathypelagic	6.7	3
Hygophum hygomii	Bermuda lantern fish	Myctophidae	bathypelagic	8.3	3
Lampanyctus crocodilus	Jewel lanternfish	Myctophidae	bathypelagic	36.6	3.2
Lampanyctus pusillus	Pygmy lanternfish	Myctophidae	bathypelagic	5.3	3.4
Lobianchia dofleini	Dofleini's lantern fish	Myctophidae	bathypelagic	6.1	3
Lobianchia gemellarii	Cocco's lantern fish	Myctophidae	bathypelagic	7.3	3
Myctophum punctatum	Spotted lanternfish	Myctophidae	bathypelagic	13.4	3.4
Notoscopelus bolini		Myctophidae	pelagic-oceanic	12.4	3.2
Notoscopelus elongatus		Myctophidae	pelagic-oceanic	12.9	3.4
Notoscopelus kroyeri	Lancet fish	Myctophidae	pelagic-oceanic	17.5	3.2
Symbolophorus veranyi	Large-scale lantern fish	Myctophidae	bathypelagic	14.6	3.3
Myxine glutinosa	Hagfish	Myxinidae	demersal	80	3.5
Nemichthys scolopaceus	Slender snipe eel	Nemichthyidae	bathypelagic	130	3.5
Nemipterus japonicus	Japanese threadfin bream	Nemipteridae	demersal	32	3.8
Facciolella oxyrhyncha	Facciola's sorcerer	Nettastomatidae	demersal	79.2	3.5
Nettastoma melanurum	Blackfin sorcerer	Nettastomatidae	bathydemersal	77.3	3.5
Saurenchelys cancrivora	Slender sorcerer	Nettastomatidae	demersal	65	3.4
Cubiceps capensis	Cape fathead	Nomeidae	pelagic-oceanic	101	3.5
Cubiceps gracilis	Driftfish	Nomeidae	pelagic-oceanic	107	3.6
Psenes pellucidus	Bluefin driftfish	Nomeidae	bathypelagic	80	3.8
Notacanthus bonaparte	Shortfin spiny eel	Notacanthidae	bathypelagic	26	3.3
Polyacanthonotus rissoanus	Smallmouth spiny eel	Notacanthidae	bathydemersal	55	3.5
Apterichtus anguiformis	Slender finless eel	Ophichthidae	demersal	49.3	4
Apterichtus caecus	European finless eel	Ophichthidae	demersal	60	4.1
Dalophis imberbis	Armless snake eel	Ophichthidae	demersal	150	4
Echelus myrus	Painted eel	Ophichthidae	demersal	100	4.3
Myrichthys colubrinus	Harlequin snake eel	Ophichthidae	reef-associated	97	3.6
Mystriophis crosnieri		Ophichthidae	demersal	96.5	3.5
Ophichthus ophis	Spotted snake eel	Ophichthidae	demersal	210	4.3
Ophichthus rufus	Rufus snake-eel	Ophichthidae	demersal	60	4
Ophisurus serpens	Serpent eel	Ophichthidae	demersal	250	4.1
Pisodonophis semicinctus		Ophichthidae	demersal	80	3.5
Benthocometes robustus		Ophidiidae	bathydemersal	15	3.1
Ophidion barbatum	Snake blenny	Ophidiidae	demersal	30.5	3.6
Ophidion rochei		Ophidiidae	demersal	29.3	3.5
Parophidion vassali		Ophidiidae	demersal	30.5	3.3
Acanthostracion notacanthus	Island cowfish	Ostraciidae	demersal	50	2.5
Acanthostracion quadricornis	Scrawled cowfish	Ostraciidae	reef-associated	55	3
Lactophrys trigonus	Buffalo trunkfish	Ostraciidae	reef-associated	55	3.1
Tetrosomus gibbosus	Humpback turretfish	Ostraciidae	reef-associated	30	3.5
Arctozenus risso	Spotted barracudina	Paralepididae	bathypelagic	36.6	3.2
Lestidiops jayakari jayakari	Pacific barracudina	Paralepididae	bathypelagic	20	4.2
Lestidiops jayakari pseudosphyraenoides		Paralepididae	pelagic-oceanic	11.6	3.9
Lestidiops sphyrenoides		Paralepididae	bathypelagic	32.9	4.5
Lestidium atlanticum	Atlantic barracudina	Paralepididae	bathypelagic	25	3.7
Paralepis coregonoides	Sharpchin barracudina	Paralepididae	bathypelagic	61	4.1
Paralepis speciosa		Paralepididae	bathypelagic	37.2	3.2
Sudis hyalina		Paralepididae	bathypelagic	100	4.1
Pempheris vanicolensis	Vanikoro sweeper	Pempheridae	reef-associated	20	3.5
Peristedion cataphractum	African armoured searobin	Peristediidae	demersal	40	3.5
Lampetra fluviatilis	River lamprey	Petromyzontidae	demersal	50	4.5
Petromyzon marinus	Sea lamprey	Petromyzontidae	demersal	120	4.4
Ichthyococcus ovatus	Lightfish	Phosichthyidae	bathypelagic	6.7	3.4
Vinciguerria attenuata	Slender lightfish	Phosichthyidae	bathypelagic	4.5	3
Vinciguerria poweriae	Power's deep-water bristle-mouth fish	Phosichthyidae	bathypelagic	4.3	3.1
Phycis blennoides	Greater forkbeard	Phycidae	benthopelagic	110	3.7
Phycis phycis	Forkbeard	Phycidae	benthopelagic	65	4.3
Papilloculiceps longiceps	Tentacled flathead	Platycephalidae	reef-associated	70	4.1
Platycephalus indicus	Bartail flathead	Platycephalidae	reef-associated	100	3.6
Sorsogona prionota	Halfspined flathead	Platycephalidae	demersal	22	3.7
Platichthys flesus	European flounder	Pleuronectidae	demersal	60	3.2
Pleuronectes platessa	European plaice	Pleuronectidae	demersal	122	3.3
Plotosus lineatus	Striped eel catfish	Plotosidae	reef-associated	32	3.5
Galeoides decadactylus	Lesser African threadfin	Polynemidae	demersal	50	3.6
Polyprion americanus	Wreckfish	Polyprionidae	demersal	210	4.1
Abudefduf saxatilis	Sergeant-major	Pomacentridae	reef-associated	22.9	3.4
Abudefduf vaigiensis	Indo-Pacific sergeant	Pomacentridae	reef-associated	20	2.6
Chromis chromis	Damselfish	Pomacentridae	reef-associated	25	3
Chromis viridis	Blue green damselfish	Pomacentridae	reef-associated	10	2.5
Pomatomus saltatrix	Bluefish	Pomatomidae	pelagic-oceanic	130	4.5
Priacanthus arenatus	Atlantic bigeye	Priacanthidae	reef-associated	50	4
Priacanthus hamrur	Moontail bullseye	Priacanthidae	reef-associated	45	3.6
Pristis pectinata	Smalltooth sawfish	Pristidae	demersal	760	4.5
Pristis pristis	Common sawfish	Pristidae	demersal	750	4
Mycteroperca rubra	Mottled grouper	Psychrolutidae	demersal	144	4.1
Rachycentron canadum	Cobia	Rachycentridae	reef-associated	200	4
Regalecus glesne	King of herrings	Regalecidae	pelagic-oceanic	1100	3.2
Coregonus lavaretus	European whitefish	Salmonidae	demersal	73	3.1
Salmo salar	Atlantic salmon	Salmonidae	benthopelagic	150	4.4
Salmo trutta	Sea trout	Salmonidae	pelagic-neritic	170.8	3.2
Salvelinus alpinus alpinus	Arctic char	Salmonidae	benthopelagic	107	4.3
Salvelinus fontinalis	Brook trout	Salmonidae	demersal	104.9	3.1
Thymallus thymallus	Grayling	Salmonidae	benthopelagic	60	3.1
Scarus ghobban	Blue-barred parrotfish	Scaridae	reef-associated	90	2
Sparisoma cretense	Parrotfish	Scaridae	reef-associated	50	2.9
Argyrosomus regius	Meagre	Sciaenidae	benthopelagic	230	4.3
Sciaena umbra	Brown meagre	Sciaenidae	demersal	70	3.7
Sciaenops ocellatus	Red drum	Sciaenidae	demersal	155	4.1
Umbrina canariensis	Canary drum	Sciaenidae	demersal	80	3.4
Umbrina cirrosa	Shi drum	Sciaenidae	demersal	73	3.5
Umbrina ronchus	Fusca drum	Sciaenidae	demersal	100	3.4
Scomberesox saurus saurus	Atlantic saury	Scomberesocidae	pelagic-oceanic	50	3.6
Acanthocybium solandri	Wahoo	Scombridae	pelagic-oceanic	250	4.4
Auxis rochei rochei	Bullet tuna	Scombridae	pelagic-neritic	55.5	4.1
Auxis thazard thazard	Frigate tuna	Scombridae	pelagic-neritic	72.2	4.3
Euthynnus alletteratus	Little tunny	Scombridae	reef-associated	122	4.5
Katsuwonus pelamis	Skipjack tuna	Scombridae	pelagic-oceanic	122.1	4.3
Orcynopsis unicolor	Plain bonito	Scombridae	pelagic-neritic	144.3	4.5
Rastrelliger kanagurta	Indian mackerel	Scombridae	pelagic-neritic	38	3.2
Sarda sarda	Atlantic bonito	Scombridae	pelagic-neritic	101.4	4.5
Scomber colias	Atlantic chub mackerel	Scombridae	pelagic-neritic	59.8	3.9
Scomber japonicus	Chub mackerel	Scombridae	pelagic-neritic	64	3.1
Scomber scombrus	Atlantic mackerel	Scombridae	pelagic-neritic	66.6	3.7
Scomberomorus commerson	Narrow-barred Spanish mackerel	Scombridae	pelagic-neritic	266.4	4.5
Scomberomorus tritor	West African Spanish mackerel	Scombridae	pelagic-neritic	100	4.3
Thunnus alalunga	Albacore	Scombridae	pelagic-oceanic	155.4	4.3
Thunnus thynnus	Atlantic bluefin tuna	Scombridae	pelagic-oceanic	458	4.4
Lepidorhombus boscii	Four-spot megrim	Scophthalmidae	demersal	48.8	3.7
Lepidorhombus whiffiagonis	Megrim	Scophthalmidae	bathydemersal	60	4.2
Scophthalmus maeoticus		Scophthalmidae	demersal	45	3.7
Scophthalmus maximus	Turbot	Scophthalmidae	demersal	122	4
Scophthalmus rhombus	Brill	Scophthalmidae	demersal	75	3.8
Zeugopterus punctatus	Topknot	Scophthalmidae	demersal	30.5	4
Zeugopterus regius	Eckström's topknot	Scophthalmidae	demersal	20	3.4
Pontinus kuhlii	Offshore rockfish	Scorpaenidae	bathydemersal	52	4.1
Pterois miles	Devil firefish	Scorpaenidae	reef-associated	42.7	3.7
Scorpaena azorica		Scorpaenidae	demersal	12	3.5
Scorpaena elongata	Slender rockfish	Scorpaenidae	demersal	50	3.9
Scorpaena loppei	Cadenat's rockfish	Scorpaenidae	demersal	15	3.5
Scorpaena maderensis	Madeira rockfish	Scorpaenidae	demersal	14	4.1
Scorpaena notata	Small red scorpionfish	Scorpaenidae	demersal	24	3.5
Scorpaena porcus	Black scorpionfish	Scorpaenidae	demersal	37	3.9
Scorpaena scrofa	Red scorpionfish	Scorpaenidae	demersal	50	4.3
Scorpaena stephanica	Spotted-fin rockfish	Scorpaenidae	demersal	40	4
Scorpaenodes arenai	Messina rockfish	Scorpaenidae	demersal	11	3.5
Sebastapistes mauritiana	Spineblotch scorpionfish	Scorpaenidae	reef-associated	9.5	3.7
Helicolenus dactylopterus	Blackbelly rosefish	Sebastidae	bathydemersal	47	3.8
Trachyscorpia cristulata echinata	Spiny scorpionfish	Sebastidae	bathydemersal	50	4.2
Anthias anthias	Swallowtail seaperch	Serranidae	reef-associated	32.9	3.8
Cephalopholis taeniops	Bluespotted seabass	Serranidae	demersal	70	4.4
Epinephelus aeneus	White grouper	Serranidae	demersal	120	4
Epinephelus caninus	Dogtooth grouper	Serranidae	demersal	164	3.8
Epinephelus coioides	Orange-spotted grouper	Serranidae	reef-associated	120	3.9
Epinephelus costae	Goldblotch grouper	Serranidae	demersal	170.8	3.9
Epinephelus malabaricus	Malabar grouper	Serranidae	reef-associated	234	3.8
Epinephelus marginatus	Dusky grouper	Serranidae	reef-associated	150	3.7
Epinephelus tauvina	Greasy grouper	Serranidae	reef-associated	90	4.1
Hyporthodus haifensis	Haifa grouper	Serranidae	demersal	110	4
Mycteroperca fusca	Island grouper	Serranidae	demersal	80	4.3
Serranus atricauda	Blacktail comber	Serranidae	demersal	43.2	4.3
Serranus cabrilla	Comber	Serranidae	demersal	48.8	3.3
Serranus hepatus	Brown comber	Serranidae	demersal	25	3.5
Serranus scriba	Painted comber	Serranidae	demersal	43.9	3.8
Serrivomer lanceolatoides	Short-tooth sawpalate	Serrivomeridae	bathypelagic	65	3.5
Siganus luridus	Dusky spinefoot	Siganidae	reef-associated	30	2
Siganus rivulatus	Marbled spinefoot	Siganidae	reef-associated	27	2
Sillago sihama	Silver sillago	Sillaginidae	reef-associated	37.8	3.4
Bathysolea profundicola	Deepwater sole	Soleidae	bathypelagic	25.6	3.2
Buglossidium luteum	Solenette	Soleidae	demersal	15	3.3
Dicologlossa cuneata	Wedge sole	Soleidae	demersal	36.6	3.3
Dicologlossa hexophthalma	Ocellated wedge sole	Soleidae	demersal	20	3.4
Microchirus azevia		Soleidae	demersal	48.8	3.2
Microchirus boscanion	Lusitanian sole	Soleidae	demersal	20	3.2
Microchirus ocellatus	Foureyed sole	Soleidae	demersal	20	3.2
Microchirus variegatus	Thickback sole	Soleidae	demersal	42.7	3.3
Monochirus hispidus	Whiskered sole	Soleidae	demersal	24.4	3.2
Pegusa impar	Adriatic sole	Soleidae	demersal	35	3.2
Pegusa lascaris	Sand sole	Soleidae	demersal	48.8	3.2
Solea aegyptiaca	Egyptian sole	Soleidae	demersal	65	3.2
Solea senegalensis	Senegalese sole	Soleidae	demersal	73.2	3.1
Solea solea	Common sole	Soleidae	demersal	85.4	3.1
Synaptura lusitanica lusitanica	Portuguese sole	Soleidae	demersal	40	3.8
Synapturichthys kleinii	Klein's sole	Soleidae	demersal	40	3.5
Boops boops	Bogue	Sparidae	demersal	36	3
Crenidens crenidens	Karanteen seabream	Sparidae	demersal	30	2.8
Dentex dentex	Common dentex	Sparidae	benthopelagic	100	4.5
Dentex gibbosus	Pink dentex	Sparidae	benthopelagic	117.7	4.1
Dentex macrophthalmus	Large-eye dentex	Sparidae	benthopelagic	65	3.4
Dentex maroccanus	Morocco dentex	Sparidae	demersal	45	3.8
Diplodus annularis	Annular seabream	Sparidae	benthopelagic	24	3.4
Diplodus bellottii	Senegal seabream	Sparidae	benthopelagic	36.6	3.5
Diplodus cervinus cervinus	Zebra seabream	Sparidae	reef-associated	55	3
Diplodus puntazzo	Sharpsnout seabream	Sparidae	benthopelagic	60	2.9
Diplodus sargus sargus	White seabream	Sparidae	demersal	45	3
Diplodus vulgaris	Common two-banded seabream	Sparidae	benthopelagic	45	3.2
Evynnis ehrenbergii		Sparidae	benthopelagic	43
Lithognathus mormyrus	Sand steenbras	Sparidae	demersal	55	3.4
Oblada melanura	Saddled seabream	Sparidae	benthopelagic	34	3
Pagellus acarne	Axillary seabream	Sparidae	benthopelagic	43.9	3.5
Pagellus bellottii	Red pandora	Sparidae	demersal	51.2	3.6
Pagellus bogaraveo	Blackspot seabream	Sparidae	benthopelagic	85.4	3.7
Pagellus erythrinus	Common pandora	Sparidae	benthopelagic	73.2	3.4
Pagrus auriga	Redbanded seabream	Sparidae	benthopelagic	97.6	3.4
Pagrus caeruleostictus	Bluespotted seabream	Sparidae	benthopelagic	109.8	3.8
Pagrus major	Red seabream	Sparidae	demersal	122	3.7
Pagrus pagrus	Red porgy	Sparidae	benthopelagic	91	3.7
Rhabdosargus haffara	Haffara seabream	Sparidae	reef-associated	35	3.5
Sarpa salpa	Salema	Sparidae	benthopelagic	62.2	2
Sparus aurata	Gilthead seabream	Sparidae	demersal	70	3.3
Spondyliosoma cantharus	Black seabream	Sparidae	benthopelagic	73.2	3.3
Argyropelecus hemigymnus	Half-naked hatchetfish	Sternoptychidae	bathypelagic	4.8	3.3
Argyropelecus olfersii		Sternoptychidae	bathypelagic	9	3.4
Maurolicus muelleri	Silvery lightfish	Sternoptychidae	bathypelagic	8	3
Valenciennellus tripunctulatus	Constellationfish	Sternoptychidae	bathypelagic	3.8	3.1
Bathophilus nigerrimus	Scaleless dragonfish	Stomiidae	bathypelagic	14.9	4.2
Bathophilus vaillanti		Stomiidae	bathypelagic	22	4.4
Borostomias antarcticus	Snaggletooth	Stomiidae	bathydemersal	36.6	3.6
Chauliodus sloani	Sloane's viperfish	Stomiidae	bathypelagic	42.7	4.2
Stomias boa boa	Boa dragonfish	Stomiidae	bathypelagic	39.3	4
Pampus argenteus	Silver pomfret	Stromateidae	benthopelagic	73.2	3.1
Stromateus fiatola	Blue butterfish	Stromateidae	benthopelagic	61	4
Dysomma brevirostre	Pignosed arrowtooth eel	Synaphobranchidae	benthopelagic	30	3.6
Entelurus aequoreus	Snake pipefish	Syngnathidae	demersal	60	3.5
Hippocampus fuscus	Sea pony	Syngnathidae	demersal	12.5	3.4
Hippocampus guttulatus	Long-snouted seahorse	Syngnathidae	demersal	26.2	3.5
Hippocampus hippocampus	Short snouted seahorse	Syngnathidae	demersal	15	3.2
Minyichthys sentus		Syngnathidae	demersal	6	3.2
Nerophis lumbriciformis	Worm pipefish	Syngnathidae	demersal	17	4
Nerophis maculatus		Syngnathidae	demersal	30	3.4
Nerophis ophidion	Straightnose pipefish	Syngnathidae	demersal	30	4
Syngnathus abaster	Black-striped pipefish	Syngnathidae	demersal	21	3.2
Syngnathus acus	Greater pipefish	Syngnathidae	demersal	50	3.4
Syngnathus phlegon		Syngnathidae	pelagic-neritic	20	3.5
Syngnathus rostellatus	Nilsson's pipefish	Syngnathidae	demersal	17	3.7
Syngnathus taenionotus		Syngnathidae	demersal	19	3.4
Syngnathus tenuirostris	Narrow-snouted pipefish	Syngnathidae	demersal	26.6	3.3
Syngnathus typhle	Broadnosed pipefish	Syngnathidae	demersal	35	4.3
Saurida undosquamis	Brushtooth lizardfish	Synodontidae	reef-associated	61	4.5
Synodus saurus	Atlantic lizardfish	Synodontidae	demersal	48.8	4.5
Pelates quadrilineatus	Fourlined terapon	Terapontidae	reef-associated	30	3.5
Terapon jarbua	Jarbua terapon	Terapontidae	demersal	36	3.9
Terapon puta	Small-scaled terapon	Terapontidae	benthopelagic	16	3.1
Tetragonurus cuvieri	Smalleye squaretail	Tetragonuridae	bathypelagic	70	3.8
Arothron hispidus	White-spotted puffer	Tetraodontidae	reef-associated	50	3.1
Ephippion guttifer	Prickly puffer	Tetraodontidae	demersal	80	3.5
Lagocephalus lagocephalus lagocephalus	Oceanic puffer	Tetraodontidae	benthopelagic	61	3.7
Lagocephalus sceleratus	Silver-cheeked toadfish	Tetraodontidae	reef-associated	134.2	3.6
Lagocephalus spadiceus	Half-smooth golden pufferfish	Tetraodontidae	demersal	25	3.5
Lagocephalus suezensis		Tetraodontidae	demersal	18	3.5
Sphoeroides marmoratus	Guinean puffer	Tetraodontidae	demersal	20	3.2
Sphoeroides pachygaster	Blunthead puffer	Tetraodontidae	benthopelagic	49.4	4.2
Torquigener flavimaculosus		Tetraodontidae	reef-associated	13	3.2
Aulotrachichthys sajademalensis	Saya de Malha luminous roughy	Trachichthyidae	bathypelagic	11.7	4
Gephyroberyx darwinii	Darwin's slimehead	Trachichthyidae	benthopelagic	60	3.9
Hoplostethus mediterraneus mediterraneus	Mediterranean slimehead	Trachichthyidae	benthopelagic	51.2	3.5
Echiichthys vipera	Lesser weever	Trachinidae	demersal	18.3	4.4
Trachinus araneus	Spotted weever	Trachinidae	demersal	54.9	4
Trachinus draco	Greater weever	Trachinidae	demersal	53	4.2
Trachinus radiatus	Starry weever	Trachinidae	demersal	50	4
Trachipterus arcticus	Dealfish	Trachipteridae	bathypelagic	300	4.5
Trachipterus trachypterus	Mediterranean dealfish	Trachipteridae	bathypelagic	300	4.5
Zu cristatus	Scalloped ribbonfish	Trachipteridae	bathypelagic	144	4.5
Lepidopus caudatus	Silver scabbardfish	Trichiuridae	benthopelagic	210	3.8
Trichiurus lepturus	Largehead hairtail	Trichiuridae	benthopelagic	234	4.4
Chelidonichthys cuculus	Red gurnard	Triglidae	demersal	50	3.8
Chelidonichthys lucerna	Tub gurnard	Triglidae	demersal	75	3.7
Chelidonichthys obscurus	Longfin gurnard	Triglidae	demersal	34	3.4
Eutrigla gurnardus	Grey gurnard	Triglidae	demersal	60	3.6
Lepidotrigla cavillone	Large-scaled gurnard	Triglidae	demersal	20	3.2
Lepidotrigla dieuzeidei	Spiny gurnard	Triglidae	demersal	20	3.7
Trigla lyra	Piper gurnard	Triglidae	bathydemersal	60	3.5
Trigloporus lastoviza	Streaked gurnard	Triglidae	demersal	40	3.4
Tripterygion delaisi	Black-faced blenny	Tripterygiidae	demersal	8.9	3.4
Tripterygion melanurum		Tripterygiidae	demersal	5.3	3.5
Tripterygion tripteronotum		Tripterygiidae	demersal	8	3.4
Uranoscopus scaber	Stargazer	Uranoscopidae	demersal	40	4.4
Xiphias gladius	Swordfish	Xiphiidae	pelagic-oceanic	505	4.5
Zenopsis conchifer	Silvery John dory	Zeidae	benthopelagic	80	4.5
Zeus faber	John dory	Zeidae	benthopelagic	90	4.5
Melanostigma atlanticum	Atlantic soft pout	Zoarcidae	bathypelagic	15	3
			Means	65.0877	3.52539

## Sheet: Table 8
Data from FishBase (version (06/2014). www.fishbase.org
Mississippi complex
Species	Name	Family	Habitat	Length (cm)	Trophic Level
Acipenser fulvescens	Lake sturgeon	Acipenseridae	demersal	274	3.3
Scaphirhynchus albus	Pallid sturgeon	Acipenseridae	demersal	200	3.9
Scaphirhynchus suttkusi	Alabama sturgeon	Acipenseridae	demersal	154	3.5
Amblyopsis rosae	Ozark cavefish	Amblyopsidae	demersal	6.2	3.5
Amblyopsis spelaea	Northern cavefish	Amblyopsidae	demersal	11	3.4
Forbesichthys agassizii	Spring cavefish	Amblyopsidae	demersal	9	3.3
Speoplatyrhinus poulsoni	Alabama cavefish	Amblyopsidae	demersal	7.2	3.3
Typhlichthys subterraneus	Southern cavefish	Amblyopsidae	demersal	9	3.3
Cycleptus elongatus	Blue sucker	Catostomidae	benthopelagic	93	3.1
Cycleptus meridionalis	Southeastern blue sucker	Catostomidae	benthopelagic	70.2	3
Moxostoma congestum	Gray redhorse	Catostomidae	demersal	65	3.1
Moxostoma lacerum	Harelip sucker	Catostomidae	demersal	38.2	3.1
Moxostoma valenciennesi	Greater redhorse	Catostomidae	demersal	80	3.3
Thoburnia atripinnis	Blackfin sucker	Catostomidae	demersal	17	3
Micropterus cataractae	Shoal bass	Centrarchidae	benthopelagic	61	3.7
Micropterus treculii	Guadalupe bass	Centrarchidae	demersal	46.4	3.6
Alosa alabamae	Alabama shad	Clupeidae	pelagic-neritic	62.2	2.7
Cottus paulus	Pygmy sculpin	Cottidae	demersal	4.5	3.1
Chrosomus cumberlandensis	Blackside dace	Cyprinidae	demersal	7.6	2.6
Chrosomus erythrogaster	Southern redbelly dace	Cyprinidae	demersal	9.1	2.6
Chrosomus tennesseensis	Tennessee dace	Cyprinidae	demersal	7.2	2.7
Clinostomus elongatus	Redside dace	Cyprinidae	demersal	12	3.2
Cyprinella caerulea	Blue shiner	Cyprinidae	benthopelagic	10	3.1
Cyprinella callitaenia	Bluestripe shiner	Cyprinidae	benthopelagic	9	3.1
Cyprinella lepida	Plateau shiner	Cyprinidae	benthopelagic	7.5	3.1
Cyprinella monacha	Spotfin chub	Cyprinidae	benthopelagic	11	2.9
Erimystax cahni	Slender chub	Cyprinidae	demersal	9.4	2.9
Erimystax harryi	Ozark chub	Cyprinidae	benthopelagic	11.1	2.9
Hemitremia flammea	Flame chub	Cyprinidae	demersal	7.8	3.2
Hybognathus argyritis	Western silvery minnow	Cyprinidae	demersal	12	2
Hybognathus placitus	Plains minnow	Cyprinidae	demersal	13	2
Hybopsis amnis	Pallid shiner	Cyprinidae	benthopelagic	8.4	2.9
Hybopsis lineapunctata	Lined chub	Cyprinidae	benthopelagic	8.5	2.9
Lythrurus snelsoni	Ouachita shiner	Cyprinidae	benthopelagic	5.3	3.1
Macrhybopsis australis	Prairie chub	Cyprinidae	benthopelagic	12.5	3.4
Macrhybopsis gelida	Sturgeon chub	Cyprinidae	demersal	8.4	3.3
Macrhybopsis meeki	Sicklefin chub	Cyprinidae	demersal	11	3.3
Macrhybopsis tetranema	Peppered chub	Cyprinidae	benthopelagic	12.5	3.4
Notropis albizonatus	Palezone shiner	Cyprinidae	benthopelagic	6.9	2.8
Notropis anogenus	Pugnose shiner	Cyprinidae	benthopelagic	5.8	2.7
Notropis ariommus	Popeye shiner	Cyprinidae	benthopelagic	9.5	2.8
Notropis buccula	Smalleye shiner	Cyprinidae	benthopelagic	7.1	2.8
Notropis cahabae	Cahaba shiner	Cyprinidae	benthopelagic	7.5	2.8
Notropis chalybaeus	Ironcolor shiner	Cyprinidae	benthopelagic	6.5	2.8
Notropis girardi	Arkansas River shiner	Cyprinidae	benthopelagic	8	2.8
Notropis hypsilepis	Highscale shiner	Cyprinidae	benthopelagic	6.2	2.8
Notropis melanostomus	Blackmouth shiner	Cyprinidae	benthopelagic	3.8	2.9
Notropis ortenburgeri	Kiamichi shiner	Cyprinidae	benthopelagic	5.5	2.8
Notropis oxyrhynchus	Sharpnose shiner	Cyprinidae	benthopelagic	11.6	2.7
Notropis ozarcanus	Ozark shiner	Cyprinidae	benthopelagic	7.5	2.8
Notropis perpallidus	Peppered shiner	Cyprinidae	benthopelagic	5	2.9
Notropis rupestris	Bedrock shiner	Cyprinidae	benthopelagic	7	2.8
Notropis suttkusi	Rocky shiner	Cyprinidae	benthopelagic	5.4	2.8
Notropis topeka	Topeka shiner	Cyprinidae	benthopelagic	7.6	2.8
Phoxinus saylori	Laurel dace	Cyprinidae	benthopelagic	9.2	2.6
Pteronotropis hubbsi	Bluehead shiner	Cyprinidae	benthopelagic	6	2.9
Pteronotropis merlini	Orangetail shiner	Cyprinidae	pelagic	6.6	2.9
Pteronotropis welaka	Bluenose shiner	Cyprinidae	benthopelagic	6	2.9
Elassoma alabamae	Spring pygmy sunfish	Elassomatidae	benthopelagic	3.5	3.5
Fundulus albolineatus	Whiteline topminnow	Fundulidae	benthopelagic	9	3.1
Fundulus bifax	Stippled studfish	Fundulidae	benthopelagic	12	3.1
Fundulus euryzonus	Broadstripe topminnow	Fundulidae	benthopelagic	9	3.1
Fundulus julisia	Barrens topminnow	Fundulidae	benthopelagic	7	3.1
Ameiurus brunneus	Snail bullhead	Ictaluridae	demersal	29	3.4
Ameiurus serracanthus	Spotted bullhead	Ictaluridae	demersal	28	3.4
Ictalurus lupus	Headwater catfish	Ictaluridae	demersal	48	3.5
Noturus baileyi	Smoky madtom	Ictaluridae	demersal	7.3	3.2
Noturus crypticus	Chucky madtom	Ictaluridae	benthopelagic	7.9	3.3
Noturus fasciatus	Saddled madtom	Ictaluridae	benthopelagic	7.6	3.2
Noturus flavater	Checkered madtom	Ictaluridae	demersal	18	3.4
Noturus flavipinnis	Yellowfin madtom	Ictaluridae	demersal	15	3.4
Noturus gladiator	Piebald madtom	Ictaluridae	demersal	13	3.3
Noturus lachneri	Ouachita madtom	Ictaluridae	demersal	10	3.3
Noturus munitus	Frecklebelly madtom	Ictaluridae	demersal	9.5	3.3
Noturus placidus	Neosho madtom	Ictaluridae	demersal	8.7	3.3
Noturus stanauli	Pygmy madtom	Ictaluridae	demersal	4.2	3.1
Noturus stigmosus	Northern madtom	Ictaluridae	demersal	13	3.7
Noturus taylori	Caddo madtom	Ictaluridae	demersal	7.7	3.2
Noturus trautmani	Scioto madtom	Ictaluridae	demersal	6.1	3.2
Satan eurystomus	Widemouth blindcat	Ictaluridae	bathydemersal	13.7	3.3
Trogloglanis pattersoni	Toothless blindcat	Ictaluridae	bathydemersal	10.4	3.3
Atractosteus spatula	Alligator gar	Lepisosteidae	demersal	162.5	4
Morone saxatilis	Striped bass	Moronidae	demersal	200	4.5
Ammocrypta clara	Western sand darter	Percidae	demersal	7.1	3.3
Ammocrypta pellucida	Eastern sand darter	Percidae	demersal	8.4	3.6
Crystallaria asprella	Crystal darter	Percidae	demersal	16	3.5
Crystallaria cincotta	Diamond darter	Percidae	benthopelagic	9.4	3.3
Etheostoma acuticeps	Sharphead darter	Percidae	benthopelagic	8.4	3.2
Etheostoma bellator	Warrior darter	Percidae	benthopelagic	7.5	3.2
Etheostoma boschungi	Slackwater darter	Percidae	benthopelagic	7.8	3.2
Etheostoma brevirostrum	Holiday darter	Percidae	benthopelagic	5.8	3.2
Etheostoma cervus	Chickasaw darter	Percidae	benthopelagic	6.4	3.2
Etheostoma chermocki	Vermilion darter	Percidae	benthopelagic	7.5	3.2
Etheostoma chienense	Relict darter	Percidae	benthopelagic	8.7	3.3
Etheostoma chuckwachatte	Lipstick darter	Percidae	benthopelagic	7.5	3.2
Etheostoma cinereum	Ashy darter	Percidae	benthopelagic	12	3.3
Etheostoma corona	Crown darter	Percidae	benthopelagic	7.8	3.2
Etheostoma cragini	Arkansas darter	Percidae	benthopelagic	6	3.2
Etheostoma denoncourti	Golden darter	Percidae	benthopelagic	3.5	3.1
Etheostoma ditrema	Coldwater darter	Percidae	benthopelagic	5.4	3.2
Etheostoma etowahae	Etowah darter	Percidae	benthopelagic	7.5	3.2
Etheostoma fonticola	Fountain darter	Percidae	benthopelagic	4.3	3.1
Etheostoma forbesi	Barrens darter	Percidae	benthopelagic	9.1	3.3
Etheostoma gutselli	Tuckasegee darter	Percidae	benthopelagic	7.5	3.2
Etheostoma lepidum	Greenthroat darter	Percidae	benthopelagic	6.6	3.2
Etheostoma maculatum	Spotted darter	Percidae	benthopelagic	9	3.3
Etheostoma moorei	Yellowcheek darter	Percidae	benthopelagic	7.2	3.2
Etheostoma neopterum	Lollipop darter	Percidae	benthopelagic	8.9	3.3
Etheostoma nianguae	Niangua darter	Percidae	benthopelagic	13	3.3
Etheostoma nuchale	Watercress darter	Percidae	benthopelagic	5.4	3.2
Etheostoma okaloosae	Okaloosa darter	Percidae	benthopelagic	5.3	3.2
Etheostoma olivaceum	Sooty darter	Percidae	benthopelagic	8	3.2
Etheostoma osburni	Candy darter	Percidae	benthopelagic	10	3.3
Etheostoma pallididorsum	Paleback darter	Percidae	benthopelagic	6	3.2
Etheostoma percnurum	Duskytail darter	Percidae	benthopelagic	7.5	3.2
Etheostoma phytophilum	Rush darter	Percidae	benthopelagic	7.5	3.2
Etheostoma pseudovulatum	Egg-mimic darter	Percidae	benthopelagic	7.5	3.2
Etheostoma pyrrhogaster	Firebelly darter	Percidae	benthopelagic	7	3.2
Etheostoma raneyi	Yazoo darter	Percidae	benthopelagic	7.5	3.2
Etheostoma rufilineatum	Redline darter	Percidae	benthopelagic	8.4	3.2
Etheostoma sagitta	Arrow darter	Percidae	benthopelagic	12	3.3
Etheostoma scotti	Cherokee darter	Percidae	benthopelagic	7.5	3.2
Etheostoma sequatchiense	Sequatchie darter	Percidae	benthopelagic	7.5	3.2
Etheostoma striatulum	Striated darter	Percidae	benthopelagic	5.6	3.2
Etheostoma susanae	Cumberland darter	Percidae	benthopelagic	7.5	3.2
Etheostoma tecumsehi	Shawnee darter	Percidae	benthopelagic	6.6	3.2
Etheostoma tippecanoe	Tippecanoe darter	Percidae	benthopelagic	4.3	3.1
Etheostoma trisella	Trispot darter	Percidae	benthopelagic	5.9	3.2
Etheostoma tuscumbia	Tuscumbia darter	Percidae	benthopelagic	6.1	3.2
Etheostoma vulneratum	Wounded darter	Percidae	benthopelagic	8	3.2
Etheostoma wapiti	Boulder darter	Percidae	benthopelagic	8.5	3.2
Nothonotus aquali	Coppercheek darter	Percidae	benthopelagic	8	3.2
Nothonotus microlepidus	Smallscale darter	Percidae	benthopelagic	7.2	3.2
Percina antesella	Amber darter	Percidae	benthopelagic	7.2	3.3
Percina aurolineata	Goldline darter	Percidae	benthopelagic	9	3.3
Percina aurora	Pearl darter	Percidae	benthopelagic	10.7	3.4
Percina austroperca	Southern logperch	Percidae	benthopelagic	10.7	3.4
Percina brevicauda	Coal darter	Percidae	benthopelagic	10.7	3.4
Percina burtoni	Blotchside darter	Percidae	benthopelagic	16	3.5
Percina cymatotaenia	Bluestripe darter	Percidae	benthopelagic	9	3.3
Percina jenkinsi	Conasauga logperch	Percidae	benthopelagic	14	3.5
Percina kusha	Bridled darter	Percidae	benthopelagic	7.9	3.3
Percina lenticula	Freckled darter	Percidae	benthopelagic	20	3.5
Percina macrocephala	Longhead darter	Percidae	benthopelagic	12	3.4
Percina nasuta	Longnose darter	Percidae	benthopelagic	11	3.4
Percina pantherina	Leopard darter	Percidae	benthopelagic	9.2	3.3
Percina sipsi	Bankhead darter	Percidae	benthopelagic	6.1	3.3
Percina smithvanizi	Muscadine Darter	Percidae	benthopelagic	7.7	3.3
Percina squamata	Olive darter	Percidae	benthopelagic	13	3.4
Percina tanasi	Snail darter	Percidae	benthopelagic	9	3.3
Percina uranidea	Stargazing darter	Percidae	benthopelagic	7.8	3.3
Percina williamsi	Sickle darter	Percidae	benthopelagic	11	3.4
Gambusia clarkhubbsi	San Felipe gambusia	Poeciliidae	benthopelagic	7.1	3.2
Gambusia georgei	San Marcos gambusia	Poeciliidae	benthopelagic	4.9	3.2
Gambusia heterochir	Clear Creek gambusia	Poeciliidae	benthopelagic	5.4	3.2
Gambusia speciosa	Tex-Mex gambusia	Poeciliidae	benthopelagic	5	3.2
Polyodon spathula	Mississippi paddlefish	Polyodontidae	demersal	221	3
Thymallus arcticus	Arctic grayling	Salmonidae	benthopelagic	76	3.3
Microphis lineatus	Opossum pipefish	Syngnathidae	pelagic-neritic	95	3.6
			Means	20.1226	3.18365

## Sheet: Table 9
This study
Kem Kem
Species	Name	Family	Habitat	Length (cm)	Trophic Level
Ceratodus humei		Ceratodontidae	NA	9	3.2
Arganodus tiguidiensis		Arganodontidae	NA	9	3.2
Neoceratodus africanus		Neoceratodontidae	NA	70	3.2
Mawsonia lavocati		Mawsoniidae	NA	350	4.4
cf. Axelrodichthys		Mawsoniidae	NA	76.5	4.4
cf. Bawitius		Polypteridae	NA	250	3
Bartschichthys sp.		Polypteridae	NA		3
Sudania sp.		Polypteridae	NA		3
?Lepidotes pankowskii		Family indet.	NA	250	3.2
Obaichthys africanus		Obaichthyidae	NA	30	3
?Dentilepisosteus kemkemensis		Obaichthyidae	NA		3
Oniichthys falipoui		Lepisosteidae	NA	40	4
Calamopleurus africanus		Amiidae	NA	50	4
Aidachar pankowskii		Cladocyclidae	NA	100	4.2
Palaeonotopterus greenwoodi		Notopteridae	NA	85	3.2
Concavotectum moroccensis		Plethodidae	NA	150	2.5
Erfoudichthys rosae		Teleostei i.s.	NA	45	2
		Means		108.179	3.32353

## Sheet: Table 10
	Summary (tables 1-9)
		mean TL	Trophic level
	Mediterranee	65.0877	3.52539
	Atlantic	41.1028	3.50692
	Paraguay basin	19.7077	2.97381
	Gange	41.4789	3.19341
	Congo basin	20.5373	3.05703
	Okawango	25.8288	3.19192
	Amazone	19.3245	3.04435
	Mississippi complex	20.1226	3.18365
	Kem Kem	108.179	3.32353
